# Supplementary material for: Design and synthesis of novel quinazolinone–chalcone hybrids as potential apoptotic candidates targeting caspase-3 and PARP-1:in vitro, molecular docking, and SAR studies
Source: Royal Society of Chemistry journal article supplement (doi:10.1039/d2nj04053k), 2022-01-01
Supplement: d2nj04053k1.pdf [file d2nj04053k1.pdf]

**Design and Synthesis of Novel Quinazolinone-Chalcone Hybrids as Potential Apoptotic Candidates Targeting Caspase-3 and PARP-1: *In Vitro*, Molecular Docking, and SAR Studies**

Eman A. Madbouly<sup>1</sup>, El-Sayed M. Lashine<sup>1</sup>, Ahmed A. Al-Karmalawy<sup>2,\*</sup>, Mahmoud M Sebaiy<sup>1</sup>, Harris Pratsinis<sup>3</sup>, Dimitris Kletsas<sup>3</sup>, and Kamel Metwally<sup>4</sup>

<sup>1</sup> Department of Medicinal Chemistry, Faculty of Pharmacy, Zagazig University, Zagazig, Egypt.

<sup>2</sup> Pharmaceutical Chemistry Department, Faculty of Pharmacy, Ahram Canadian University, 6th of October City, Giza 12566, Egypt.

<sup>3</sup> Laboratory of Cell Proliferation and Ageing, Institute of Biosciences and Applications, National Centre of Scientific Research "Demokritos", Athens, Greece.

<sup>4</sup> Department of Pharmaceutical Chemistry, Faculty of Pharmacy, University of Tabuk, Tabuk, KSA.

**Corresponding author:**

Ahmed A. Al-Karmalawy: [akarmalawy@acu.edu.eg](mailto:akarmalawy@acu.edu.eg)

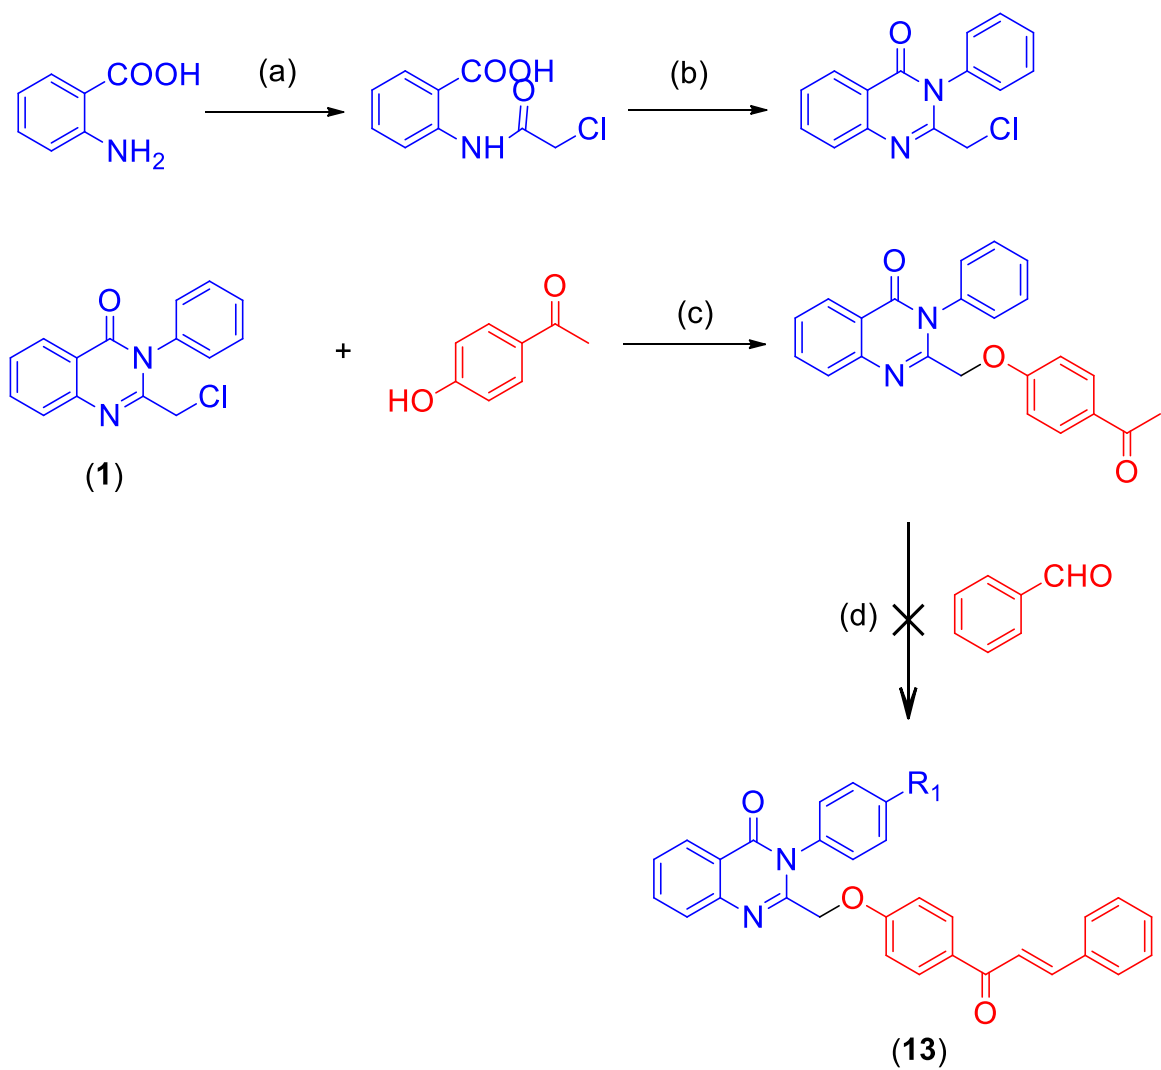

**Scheme SI 1.** Reagents and conditions: (a) Chloroacetylchloride, dry benzene, reflux. (b) Anilines, POCl<sub>3</sub>, dry toluene, reflux. (c) K<sub>2</sub>CO<sub>3</sub>, KI, acetonitrile, reflux. (d) NaOH, EtOH, room temperature.



**Cairo University  
Micro Analytical Center**

*DI Analysis  
Shimadzu Qp-2010 Plus*

Sample Information  
 Analyzed by : Dr. Mai Younis  
 Analyzed : 21/01/2007 12:39:38  
 Sample Name : 3A  
 Sample ID :  
 Customer Name : Dr. Eman Ashraf - Pharmacy - Zagazik  
 Data File : C:\GCMSolution\Data\Project1\3A.QGD  
 Org Data File : C:\GCMSolution\Data\Project1\3A.QGD  
 Method File : C:\GCMSolution\Data\Project1\High Temperature Op  
 Org Method File : C:\GCMSolution\Data\Project1\High Temperature Op  
 Report File :  
 Tuning File : C:\GCMSolution\System1\Tune1\_default.qgt  
 \$End1\$Modified by : Dr. Mai Younis  
 Modified : 21/01/2007 12:44:09

Method  
 Analytical Line 1  
 IonSourceTemp : 250.00  
 [MS Table]  
 --Group 1 - Event 1--  
 Start Time : 0.00min  
 End Time : 10.00min  
 ACQ Mode : Scan  
 Event Time : 0.50sec  
 Scan Speed : 1250  
 Start m/z : 50.00  
 End m/z : 600.00  
 Electron Voltage : 70 eV  
 Ionization Mode : EI

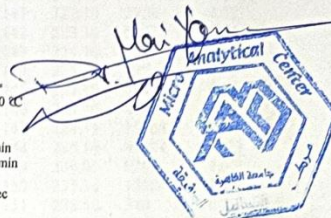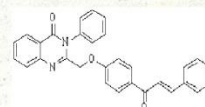

C:\GCMSolution\Data\Project1\3A.QGD

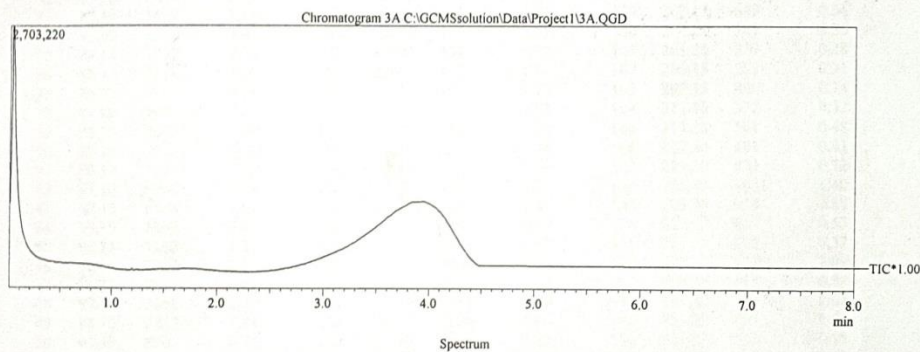

Line#:1 R.Time:4.0(Scan#:477)  
 MassPeaks:197  
 RawMode:Single 4.0(477) BasePeak:132(116167)  
 BG Mode:None Group 1 - Event 1

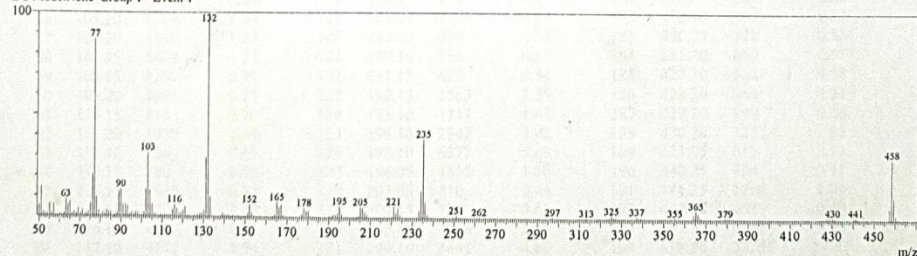

Mass Table  
 Line#:1 R.Time:4.0(Scan#:477)  
 MassPeaks:197  
 RawMode:Single 4.0(477) BasePeak:132(116167)  
 BG Mode:None Group 1 - Event 1

| # | m/z   | Abs. In | Rel. Int. | # | m/z   | Abs. In | Rel. Int. | # | m/z   | Abs. In | Rel. Int. |
|---|-------|---------|-----------|---|-------|---------|-----------|---|-------|---------|-----------|
| 1 | 50.05 | 6425    | 5.53      | 4 | 53.00 | 1905    | 1.64      | 7 | 56.15 | 1883    | 1.62      |
| 2 | 51.00 | 16610   | 14.30     | 5 | 54.05 | 1411    | 1.21      | 8 | 57.10 | 6607    | 5.69      |
| 3 | 52.05 | 2472    | 2.13      | 6 | 55.05 | 6715    | 5.78      | 9 | 58.05 | 725     | 0.62      |

**(E)-2-((4-(3-(4-chlorophenyl)acryloyl)phenoxy)methyl)-3-phenylquinazolin-4(3H)-one (14).**

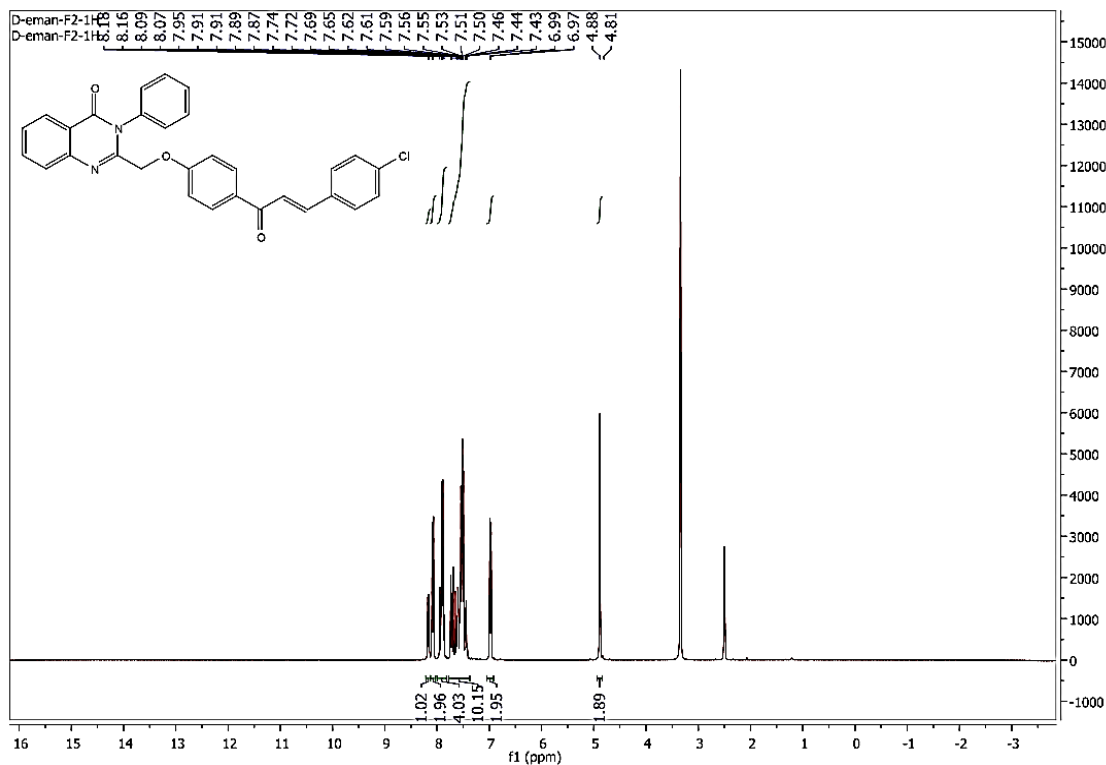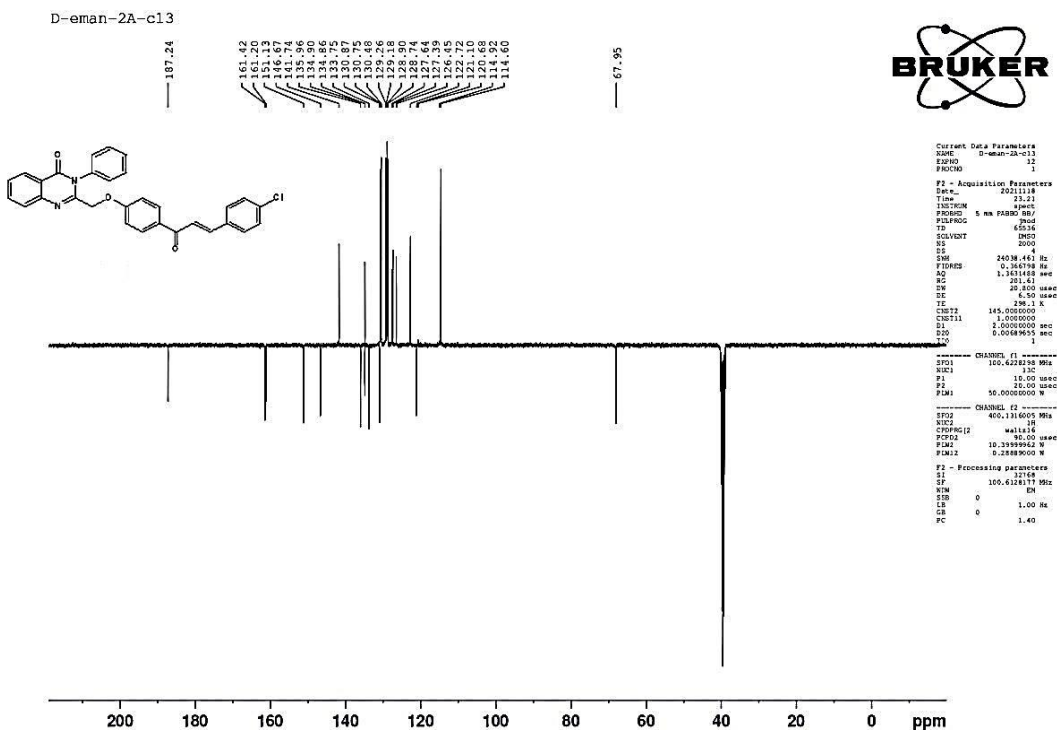

**(E)-2-((4-(3-(4-Nitrophenyl)acryloyl)phenoxy)methyl)-3-phenylquinazolin-4-(3H)-one (15).**

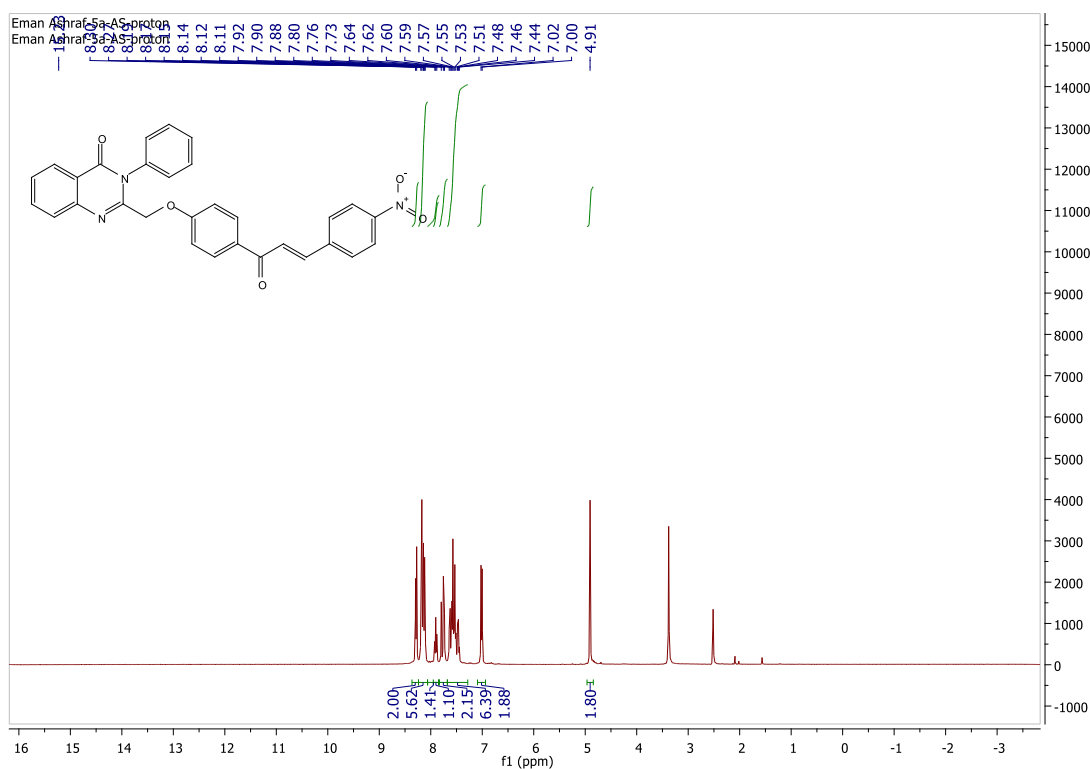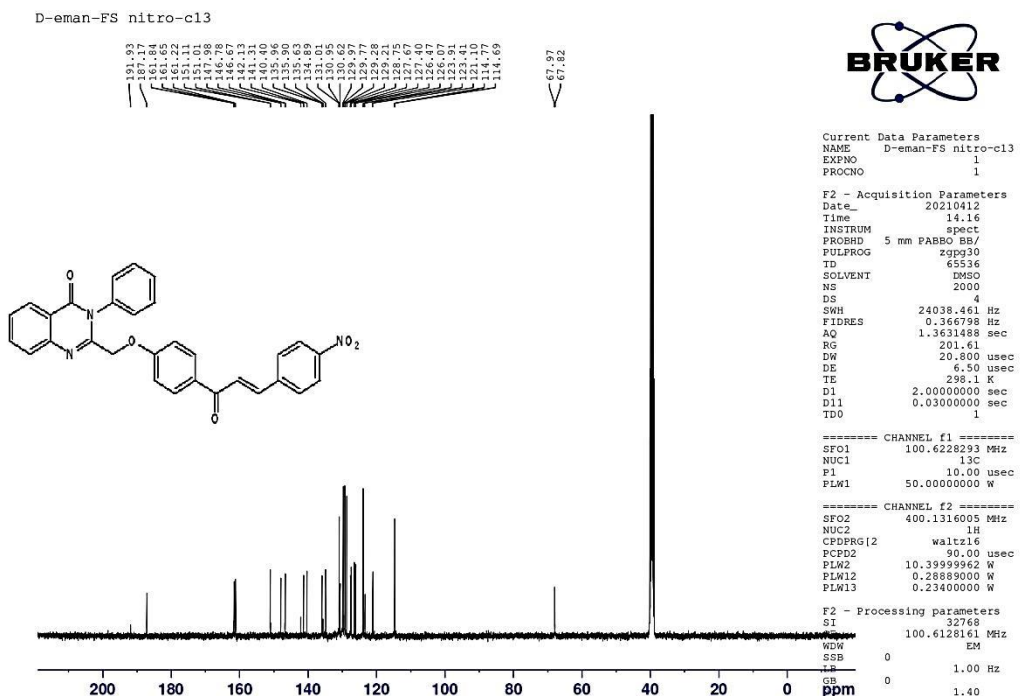

**Cairo University  
Micro Analytical Center**

**DI Analysis  
Shimadzu Qp-2010 Plus**

Sample Information  
 Analyzed by : Dr. Mai Younis  
 Analyzed : 21/01/2007 12:53:56  
 Sample Name : 5A  
 Sample ID :  
 Customer Name : Dr. Eman Ashraf - Pharmacy - Zagazig  
 Data File : C:\GCMSolution\Data\Project1\5A.QGD  
 Orig Data File : C:\GCMSolution\Data\Project1\5A.QGD  
 Method File : C:\GCMSolution\Data\Project1\High Temperature Op  
 Orig Method File : C:\GCMSolution\Data\Project1\High Temperature Op  
 Report File :  
 Tuning File : C:\GCMSolution\System1\Tune1\\_default.qgt  
 \$End1\$Modified by : Dr. Mai Younis  
 Modified : 21/01/2007 12:57:35

Method

Analytical Line 1  
 IonSourceTemp : 250.00 °C  
 [MS Table]  
 --Group 1 - Event 1--  
 Start Time : 0.00min  
 End Time : 10.00min  
 ACQ Mode : Scan  
 Event Time : 0.50sec  
 Scan Speed : 1250  
 Start m/z : 50.00  
 End m/z : 600.00  
 Electron Voltage : 70 eV  
 Ionization Mode : EI

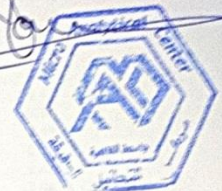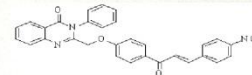

C:\GCMSolution\Data\Project1\5A.QGD

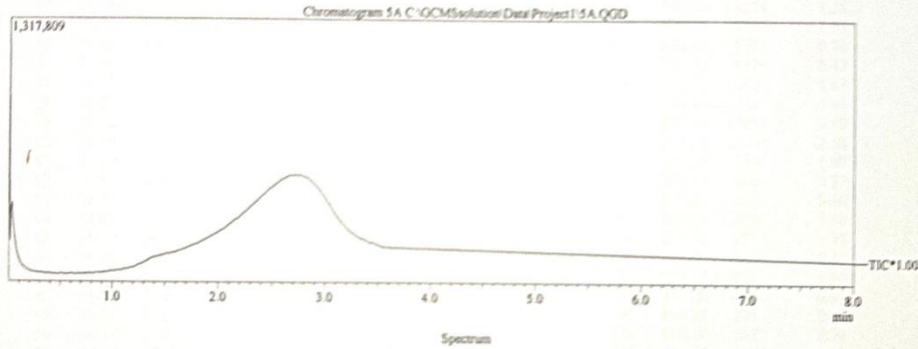

Line# 1 R.Time:2.7(Scan#:322)  
 MassPeaks:165  
 RawMode:Single 2.7(322) BasePeak:132(82366)  
 BG Mode:None Group 1 - Event 1

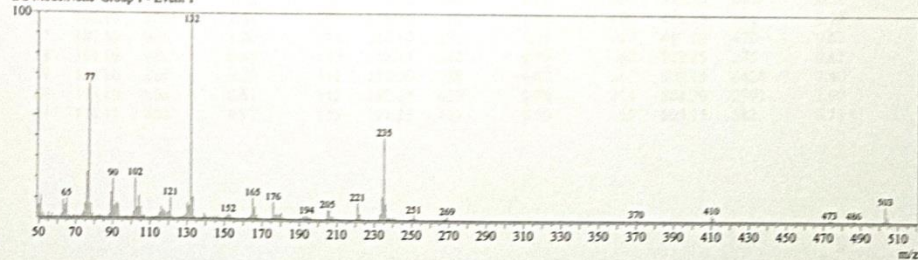

Mass Table

Line#1 R.Time:2.7(Scan#:322)

MassPeaks:165

RawMode:Single 2.7(322) BasePeak:132(82366)

BG Mode:None Group 1 - Event 1

| # | m/z   | Abs. In | Rel. Int. | # | m/z   | Abs. In | Rel. Int. |
|---|-------|---------|-----------|---|-------|---------|-----------|
| 1 | 50.05 | 5458    | 6.63      | 4 | 53.00 | 1209    | 1.47      |
| 2 | 51.00 | 8967    | 10.89     | 5 | 54.15 | 562     | 0.68      |
| 3 | 52.05 | 2105    | 2.56      | 6 | 55.05 | 2085    | 2.53      |
|   |       |         |           | 7 | 56.05 | 663     | 0.80      |
|   |       |         |           | 8 | 57.05 | 1739    | 2.11      |
|   |       |         |           | 9 | 58.10 | 354     | 0.43      |

**(E)-2-((4-(3-(4-Bromophenyl)acryloyl)phenoxy)methyl)-3-phenylquinazolin-4(3H)-one (16).**

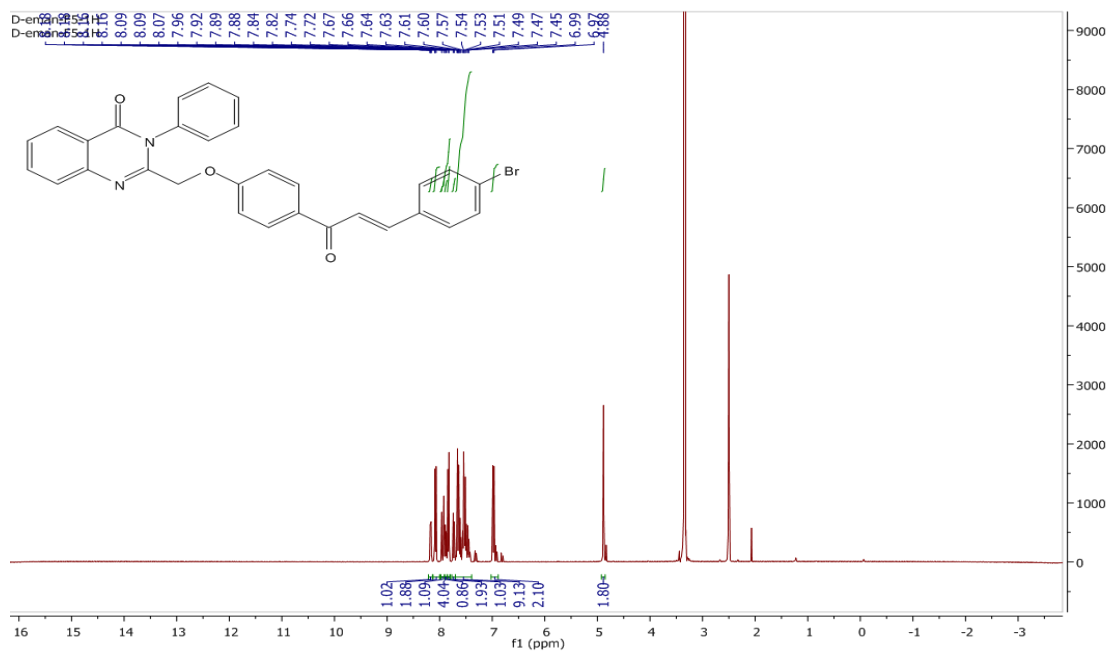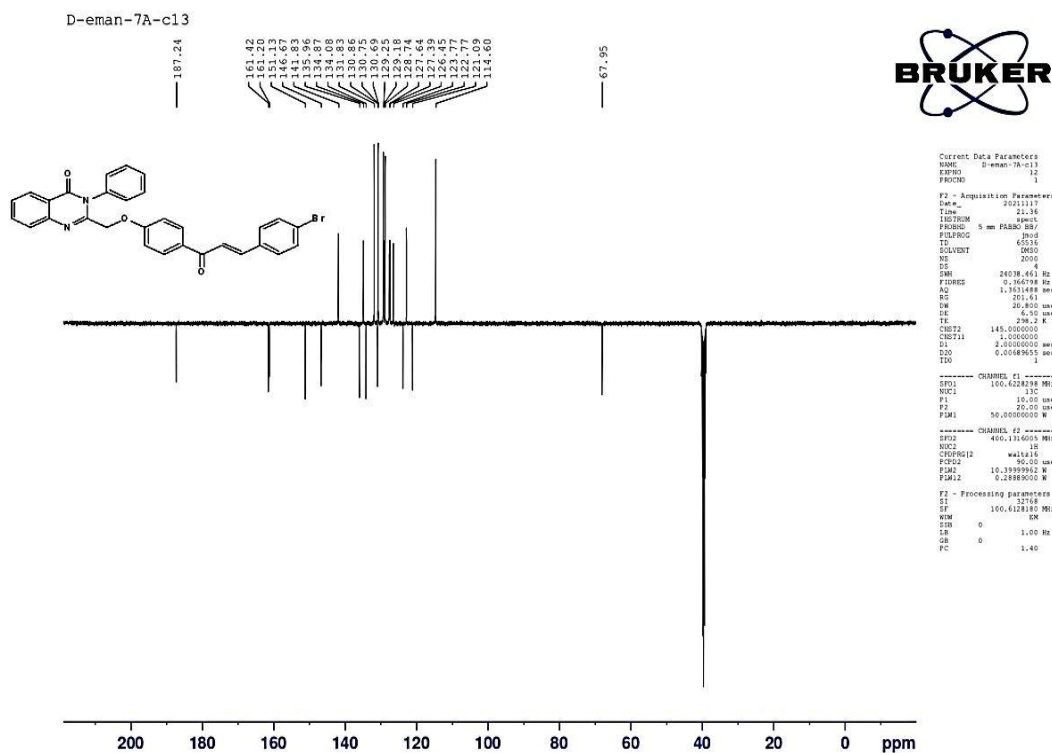

```

Current Data Parameters
NAME: D-eman-7A-c13
EXPNO: 12
PROCNO: 1

F2 - Acquisition Parameters
Date_: 20211117
Time: 23.36
INSTRUM: spect
PROBHD: 5 mm PABBO 1H/
PULPROG: zgpg30
TE: 300.2
SOLVENT: DMSO
NS: 2000
DS: 4
SFO: 240.8463 Hz
FIDRES: 0.364788 Hz
AQ: 1.303488 sec
RG: 201.61
SW: 20.800 usec
DE: 6.30 usec
TE: 298.2 K
CHST2: 149.000000
CHST1: 1.000000
D1: 2.00000000 sec
D2: 0.00000000 sec
T1: 1
----- CHANNEL f1 -----
NUC1: 13C
P1: 18.00 usec
F1: 25.00 usec
PM1: 50.00000000 W
----- CHANNEL f2 -----
NUC2: 13C
P2: 18.00 usec
F2: 25.00 usec
PM2: 50.00000000 W
----- CHANNEL f3 -----
NUC3: 13C
P3: 18.00 usec
F3: 25.00 usec
PM3: 50.00000000 W

F2 - Processing parameters
SI: 32768
SF: 100.628180 MHz
WDW: EM
SSB: 0
GB: 0
PC: 1.40
    
```



**Cairo University  
Micro Analytical Center**

**DI Analysis  
Shimadzu Qp-2010 Plus**

Sample Information  
 Analyzed by : Dr. Mai Younis  
 Analyzed : 21/01/2007 01:00:06  
 Sample Name : 7A  
 Sample ID :  
 Customer Name : Dr. Eman Ashraf - Pharmacy - Zagazik  
 Data File : C:\GCMSolution\Data\Project1\7A.QGD  
 Org. Data File : C:\GCMSolution\Data\Project1\7A.QGD  
 Method File : C:\GCMSolution\Data\Project1\High Temperature Op  
 Org. Method File : C:\GCMSolution\Data\Project1\High Temperature Op  
 Report File :  
 Tuning File : C:\GCMSolution\System\Tune1\\_default.qgt  
 \$End!\$ Modified by : Dr. Mai Younis  
 Modified : 21/01/2007 01:04:31

Method  
 Analytical Line 1  
 IonSourceTemp : 250.00 °C  
 [MS Table]  
 --Group 1 - Event 1--  
 Start Time : 0:00min  
 End Time : 10:00min  
 ACQ Mode : Scan  
 Event Time : 0:50sec  
 Scan Speed : 1250  
 Start m/z : 50.00  
 End m/z : 600.00  
 Electron Voltage : 70 eV  
 Ionization Mode : EI

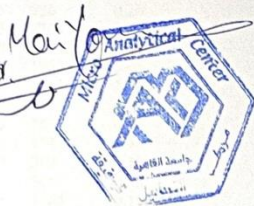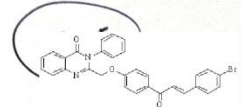

C:\GCMSolution\Data\Project1\7A.QGD

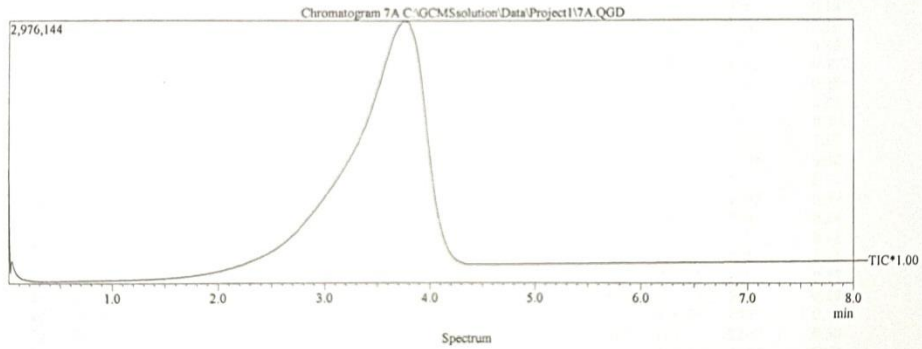

Line#:1 R.Time:3.8(Scan#:452)  
 MassPeaks:312  
 RawMode:Single 3.8(452) BasePeak:132(377270)  
 BG Mode:None Group 1 - Event 1

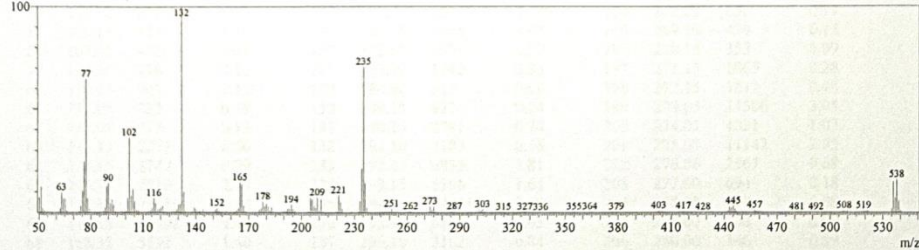

Mass Table  
 Line#:1 R.Time:3.8(Scan#:452)  
 MassPeaks:312  
 RawMode:Single 3.8(452) BasePeak:132(377270)  
 BG Mode:None Group 1 - Event 1

| # | m/z   | Abs. In | Rel. Int. | # | m/z   | Abs. In | Rel. Int. | # | m/z   | Abs. In | Rel. Int. |
|---|-------|---------|-----------|---|-------|---------|-----------|---|-------|---------|-----------|
| 1 | 50.05 | 27620   | 7.32      | 4 | 53.05 | 3678    | 0.97      | 7 | 56.15 | 717     | 0.19      |
| 2 | 51.05 | 47358   | 12.55     | 5 | 54.05 | 965     | 0.26      | 8 | 57.10 | 1671    | 0.44      |
| 3 | 52.05 | 8408    | 2.23      | 6 | 55.05 | 2650    | 0.70      | 9 | 58.10 | 434     | 0.12      |

**(E)-3-Phenyl-2-((4-(3-(p-tolyl)acryloyl)phenoxy)methyl)quinazolin-4(3H)-one (17).**

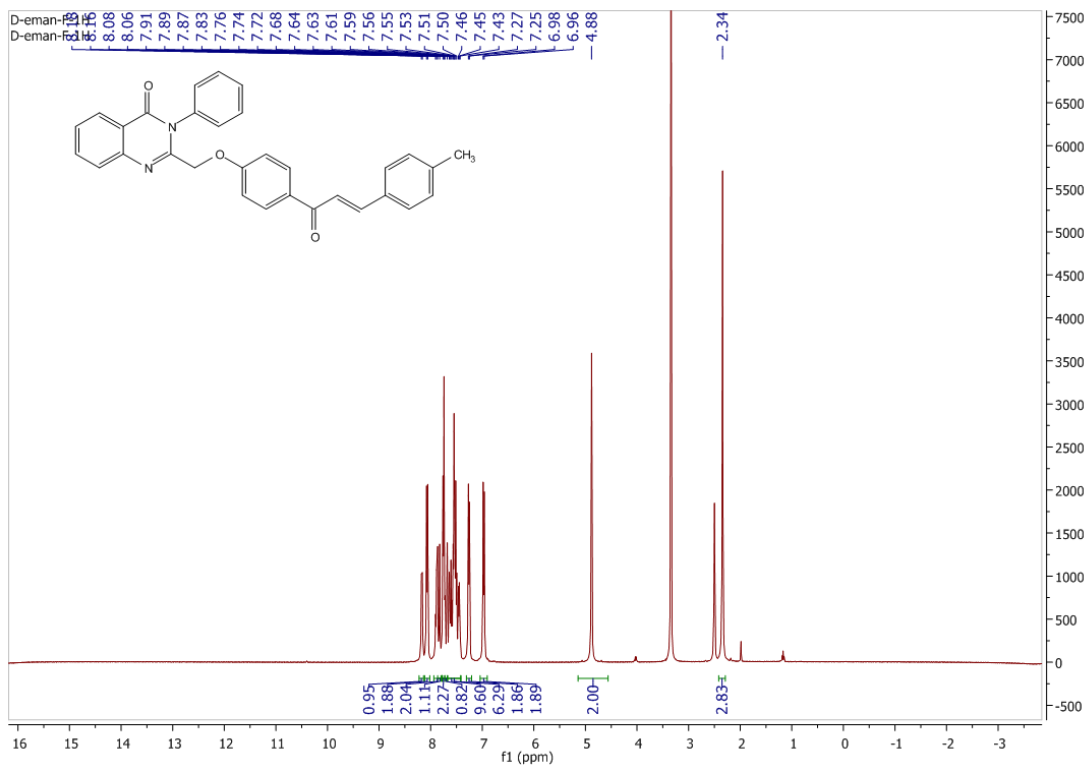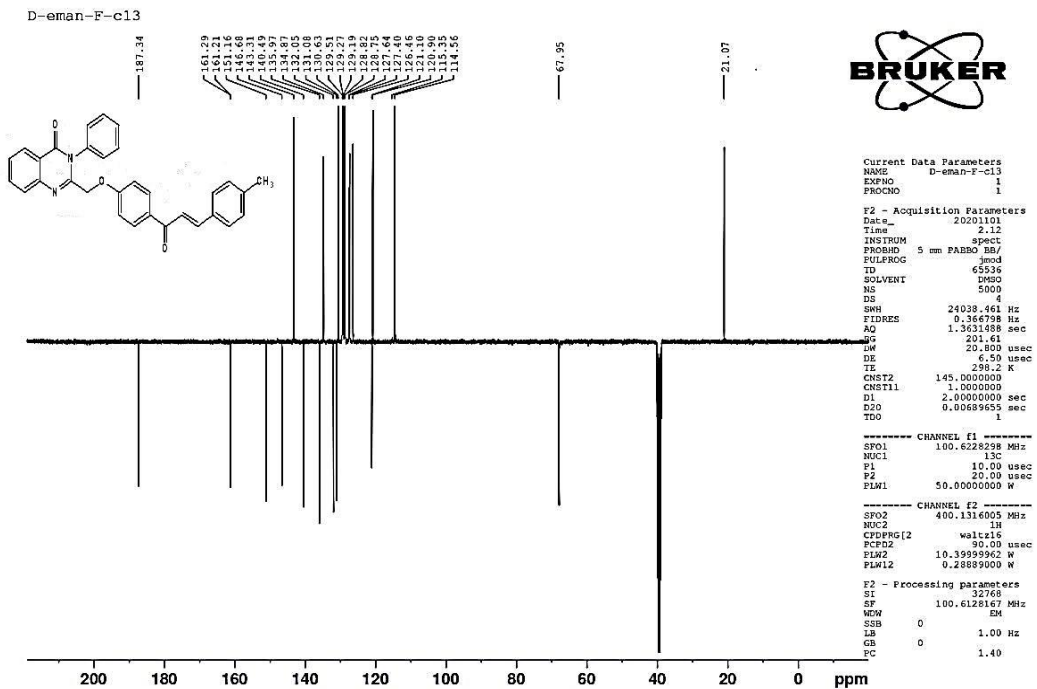

15n

**Cairo University  
Micro Analytical Center**

**DI Analysis  
Shimadzu Qp-2010 Plus**

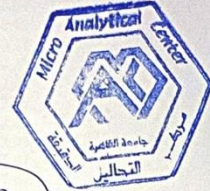

Sample Information  
 Analyzed by : Dr. Mai Younis  
 Analyzed : 27/01/2021 08:42:08  
 Sample Name : F1  
 Sample ID :  
 Customer Name : Dr. Eman Ashraf - Pharmacy - Zagazik  
 Data File : C:\GCMSsolution\Data\Project1\F1.QGD  
 Org. Data File : C:\GCMSsolution\Data\Project1\F1.QGD  
 Method File : C:\GCMSsolution\Data\Project1\High Temperature Op  
 Org. Method File : C:\GCMSsolution\Data\Project1\High Temperature Op  
 Report File :  
 Tuning File : C:\GCMSsolution\System\Tune1\\_default.qgt  
 SEnd!\S Modified by : Dr. Mai Younis  
 Modified : 27/01/2021 08:48:01

Method  
 Analytical Line 1  
 IonSourceTemp :250.00 °C  
 [MS Table]  
 -Group 1 - Event 1-  
 Start Time :0.00min  
 End Time :10.00min  
 ACQ Mode :Scan  
 Event Time :0.50sec  
 Scan Speed :1250  
 Start m/z :50.00  
 End m/z :600.00  
 Electron Voltage :70 eV  
 Ionization Mode :EI

Handwritten notes: 27.01, 20.49

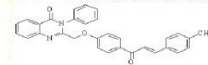

C:\GCMSsolution\Data\Project1\F1.QGD

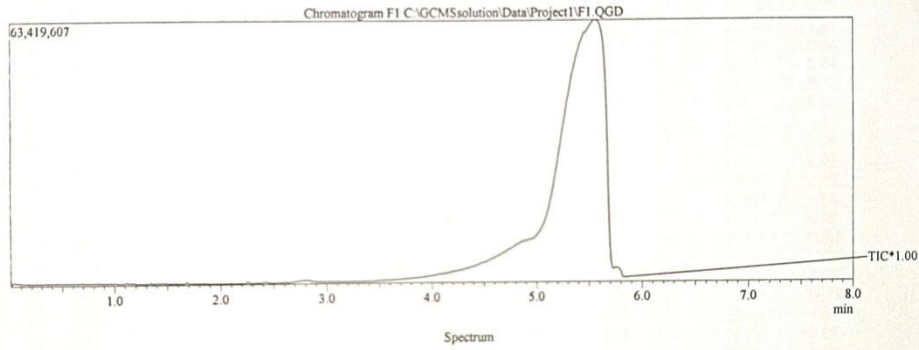

Line#:1 R.Time:5.5(Scan#:667)  
 MassPeaks:418  
 RawMode:Single 5.5(667) BasePeak:132(6712038)  
 BG Mode:None Group 1 - Event 1

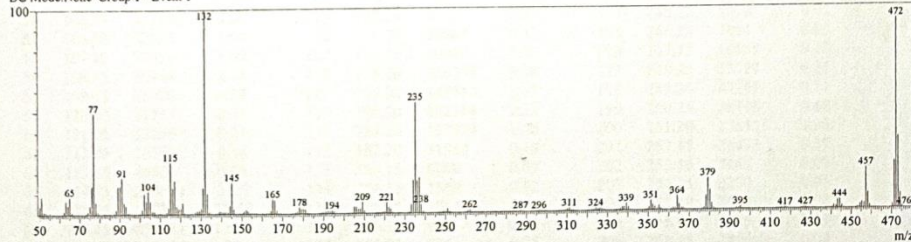

Mass Table  
 Line#:1 R.Time:5.5(Scan#:667)  
 MassPeaks:418  
 RawMode:Single 5.5(667) BasePeak:132(6712038)  
 BG Mode:None Group 1 - Event 1

| # | m/z   | Abs. In | Rel. Int. | # | m/z   | Abs. In | Rel. Int. | # | m/z   | Abs. In | Rel. Int. |
|---|-------|---------|-----------|---|-------|---------|-----------|---|-------|---------|-----------|
| 1 | 50.10 | 257380  | 3.83      | 4 | 53.05 | 66694   | 0.99      | 7 | 56.05 | 6438    | 0.10      |
| 2 | 51.05 | 573714  | 8.55      | 5 | 54.05 | 9568    | 0.14      | 8 | 57.10 | 12190   | 0.18      |
| 3 | 52.05 | 86208   | 1.28      | 6 | 55.05 | 44224   | 0.66      | 9 | 58.10 | 4007    | 0.06      |

**(E)-2-((4-(3-(4-Methoxyphenyl)acryloyl)phenoxy)methyl)-3-phenylquinazolin-4(3H)-one (18).**

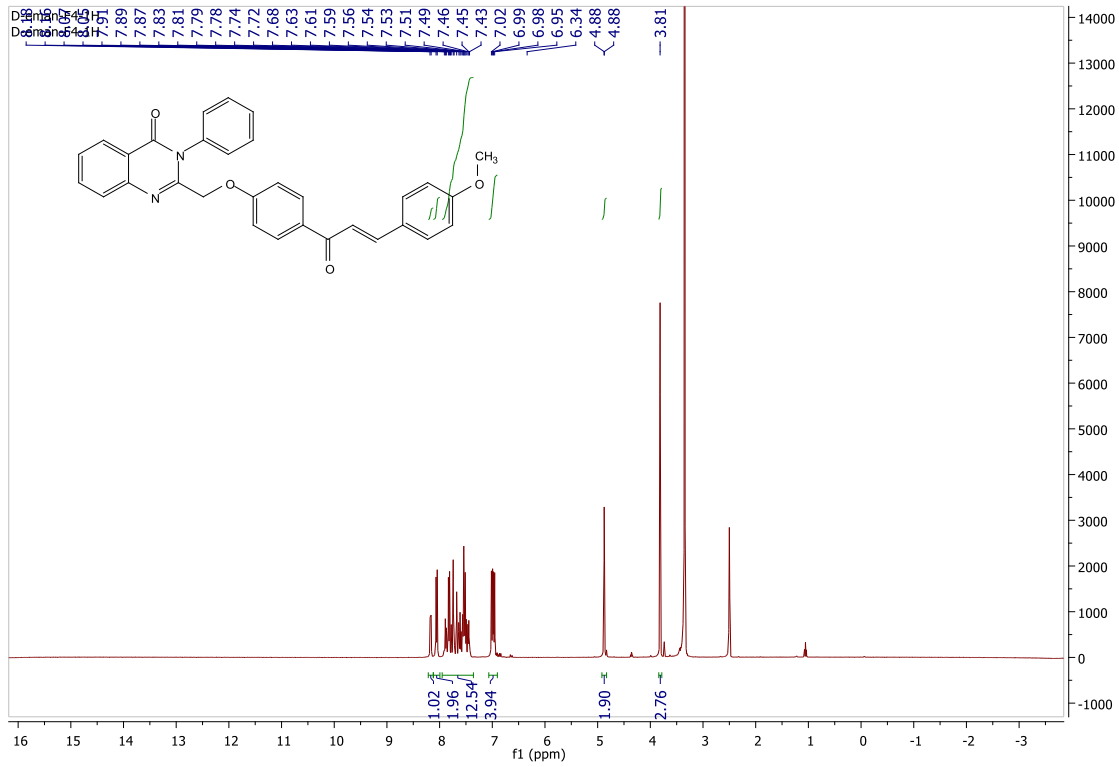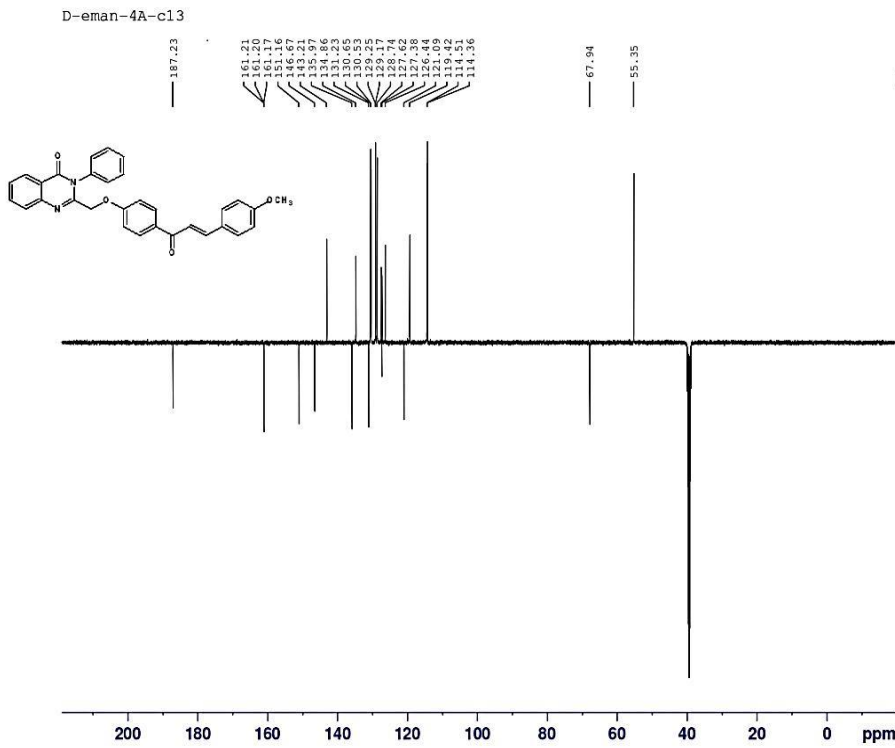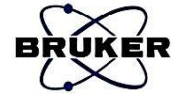

Current Data Parameters  
 NAME: D-eman-4A-c13  
 EXPNO: 10  
 PROCNO: 1  
 F2 - Acquisition Parameters  
 Date\_: 2021117  
 Time: 9:11  
 INSTRUM: spect  
 PROBHD: 5 mm PABBO MMJ  
 PULPROG: zgpg30  
 TD: 65536  
 SOLVENT: DMSO  
 NS: 4  
 DS: 4  
 SFO1: 240.861 Hz  
 FIDRES: 0.166798 Hz  
 AQ: 1.161688 sec  
 PC: 201.61  
 RM: 0.50 usec  
 RG: 4.00 usec  
 WC: 288.2 K  
 CBST1: 140.000000 Hz  
 CNST11: 1.000000  
 EX: 2.000000 sec  
 ED0: 0.0048950 sec  
 TD0: 1

----- CHANNEL f1 -----  
 SF01: 100.628288 MHz  
 NUQ1: 120  
 P1: 10.00 usec  
 PC: 30.00 usec  
 PLW1: 50.000000 W  
 ----- CHANNEL f2 -----  
 SF02: 400.141800 MHz  
 NUQ2: 16  
 CDEPRG2: waltz16  
 PCP02: 50.00 usec  
 PLW2: 10.39999999 W  
 PLW12: 0.2888000 W  
 F2 - Processing parameters  
 SI: 32768  
 SF: 100.6128183 MHz  
 WF: 6M  
 GB: 0  
 LB: 1.00 Hz  
 GB: 0  
 PC: 1.40

**Cairo University  
Micro Analytical Center**

**DI Analysis  
Shimadzu Qp-2010 Plus**

Sample Information  
 Analyzed by : Dr. Mai Younis  
 Analyzed : 21/01/2007 12:47:09  
 Sample Name : 4A  
 Sample ID :  
 Customer Name : Dr. Eman Ashraf - Pharmacy - Zagazik  
 Data File : C:\GCMSsolution\Data\Project1\4A.QGD  
 Org Data File : C:\GCMSsolution\Data\Project1\4A.QGD  
 Method File : C:\GCMSsolution\Data\Project1\High Temperature Op  
 Org Method File : C:\GCMSsolution\Data\Project1\High Temperature Op  
 Report File :  
 Tuning File : C:\GCMSsolution\System\Tune1\_default.qgt  
 \$EndIf\$Modified by : Dr. Mai Younis  
 Modified : 21/01/2007 12:51:38

Method  
 Analytical Line 1  
 IonSourceTemp : 250.00 °C  
 [MS Table]  
 -Group 1 - Event 1-  
 Start Time : 0.00min  
 End Time : 10.00min  
 ACQ Mode : Scan  
 Event Time : 0.50sec  
 Scan Speed : 1250  
 Start m/z : 50.00  
 End m/z : 600.00  
 Electron Voltage : 70 eV  
 Ionization Mode : EI

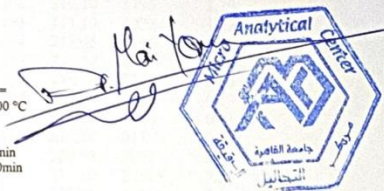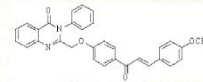

C:\GCMSsolution\Data\Project1\4A.QGD

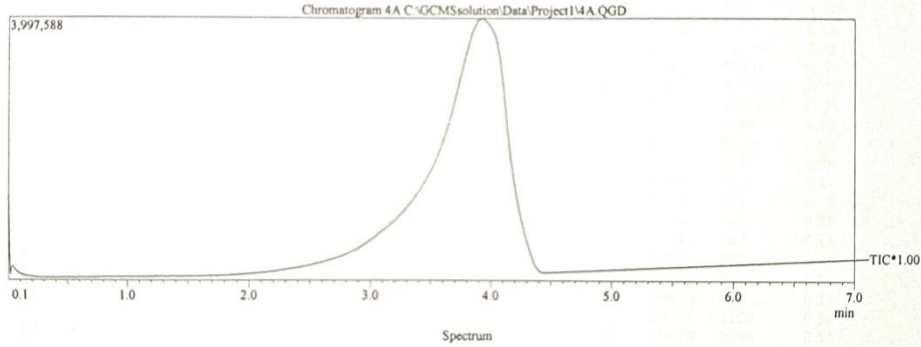

Line#:1 RTime:3.9(Scan#:472)  
 MassPeaks:308  
 RawMode:Single 3.9(472) BasePeak:132(438128)  
 BG Mode:None Group 1 - Event 1

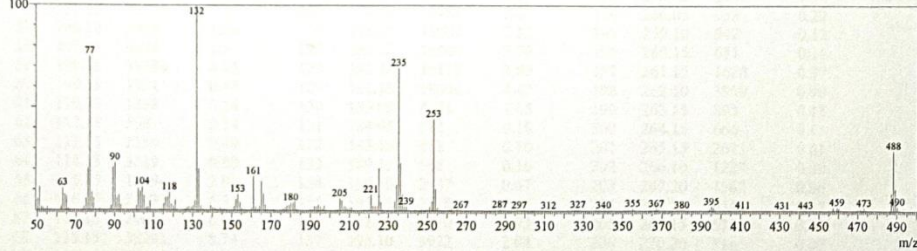

Mass Table  
 Line#:1 RTime:3.9(Scan#:472)  
 MassPeaks:308  
 RawMode:Single 3.9(472) BasePeak:132(438128)  
 BG Mode:None Group 1 - Event 1

| # | m/z   | Abs. In | Rel. Int. | # | m/z   | Abs. In | Rel. Int. | # | m/z   | Abs. In | Rel. Int. |
|---|-------|---------|-----------|---|-------|---------|-----------|---|-------|---------|-----------|
| 1 | 50.05 | 24148   | 5.51      | 4 | 53.05 | 6330    | 1.44      | 7 | 56.15 | 1173    | 0.27      |
| 2 | 51.05 | 50083   | 11.43     | 5 | 54.05 | 1519    | 0.35      | 8 | 57.10 | 2364    | 0.54      |
| 3 | 52.05 | 7691    | 1.76      | 6 | 55.05 | 6951    | 1.59      | 9 | 58.15 | 482     | 0.11      |

**(E)-2-((4-(3-(3,4-Dimethoxyphenyl)acryloyl)phenoxy)methyl)-3-phenylquinazolin-4(3H)-one (19).**

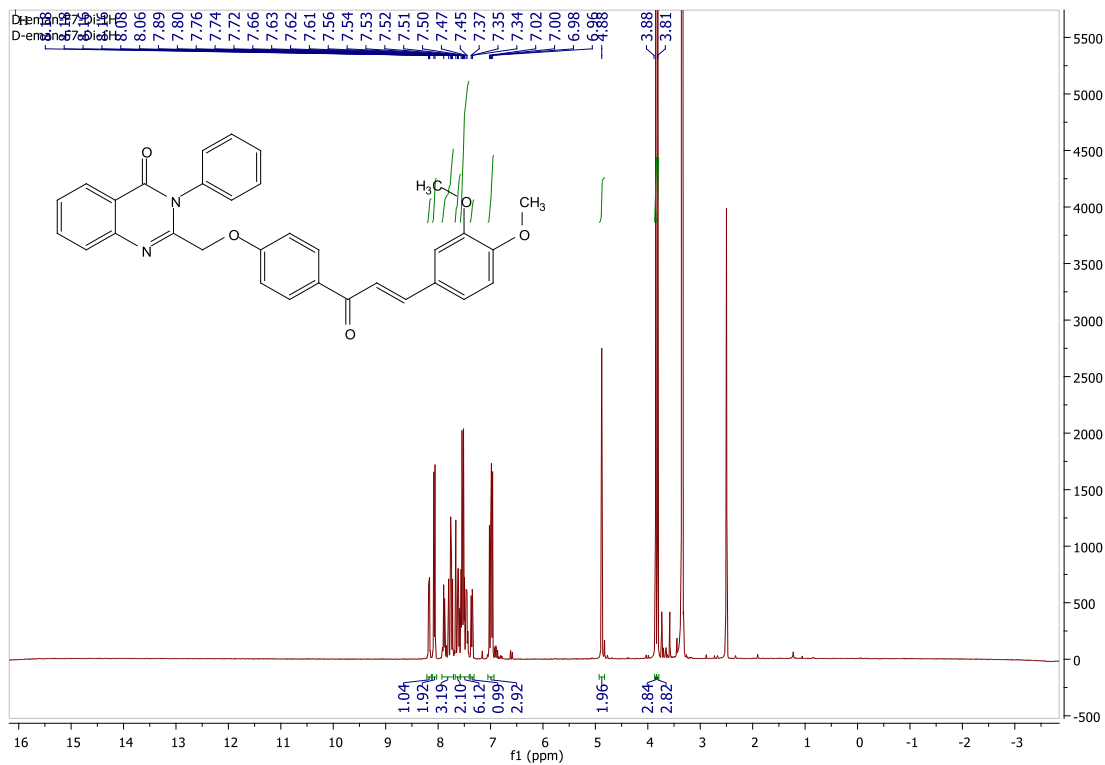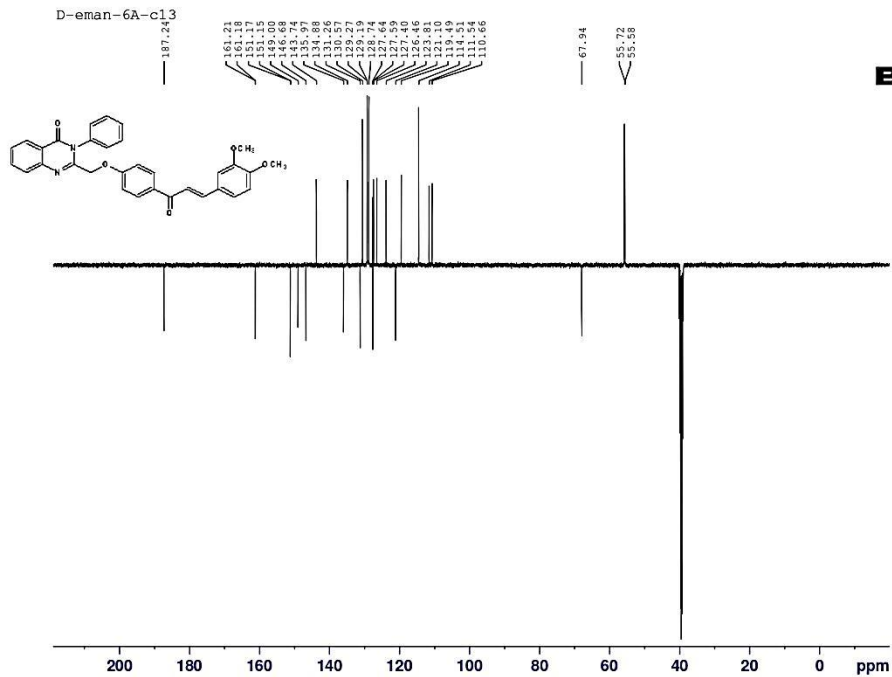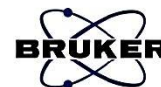

Current Data Parameters  
 NAME D-eman-6A-c13  
 EXPNO 11  
 PROCNO 1  
 F2 - Acquisition Parameters  
 Date\_ 2011118  
 Time 1.11  
 INSTRUM spect  
 PROBD 5 mm PABBO 50/  
 PULPROG smol  
 SOLVENT dmsd  
 NS 2000  
 DS 4  
 SWS 24038.461 Hz  
 FIDRES 0.356798 Hz  
 AQ 1.3631498 sec  
 RG 200.63  
 DW 20.800 usec  
 DE 6.50 usec  
 TE 298.1 K  
 CNST2 145.000000  
 CNST1 1.000000  
 DI 2.0000000 sec  
 DQ 0.00689653 sec  
 TD 1  
 ===== CHANNEL f1 =====  
 SF01 100.628208 MHz  
 NU1 13C  
 P1 10.00 usec  
 F2 20.00 usec  
 PL1 50.0000000 W  
 ===== CHANNEL f2 =====  
 SF02 400.1316000 MHz  
 NU2 1H  
 CPDPRG2 waltz16  
 PCPD2 50.00 usec  
 PL12 10.3999962 W  
 PL12 0.28889000 W  
 F2 - Processing parameters  
 SI 32768  
 SF 100.6128169 MHz  
 NH 512  
 SSB 0  
 LB 1.00 Hz  
 GB 0  
 PC 1.40

**Cairo University  
Micro Analytical Center**

**DI Analysis  
Shimadzu Qp-2010 Plus**

*Dr. Mai Younis*  
*MS*

Sample Information  
 Analyzed by : Dr. Mai Younis  
 Analyzed : 11/01/2007 03:54:59  
 Sample Name : 15  
 Sample ID :  
 Customer Name : Dr. Eman Ashraf - Pharmacy Zagazik  
 Data File : C:\GCMSolution\Data\Project1\15 QGD  
 Org. Data File : C:\GCMSolution\Data\Project1\15 QGD  
 Method File : C:\GCMSolution\Data\Project1\High Temperature Op  
 Org. Method File : C:\GCMSolution\Data\Project1\High Temperature Op  
 Report File :  
 Tuning File : C:\GCMSolution\System\Tune1\default.qgt  
 SEndIfS Modified by : Dr. Mai Younis  
 Modified : 11/01/2007 04:02:40

Method  
 Analytical Line 1  
 IonSourceTemp : 250.00 °C  
 [MS Table]  
 --Group 1 - Event 1--  
 Start Time : 0.00min  
 End Time : 10.00min  
 ACQ Mode : Scan  
 Event Time : 0.50sec  
 Scan Speed : 1250  
 Start m/z : 50.00  
 End m/z : 600.00  
 Electron Voltage : 70 eV  
 Ionization Mode : EI

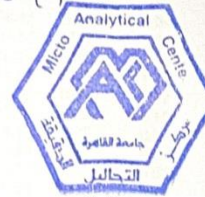

C:\GCMSolution\Data\Project1\15 QGD

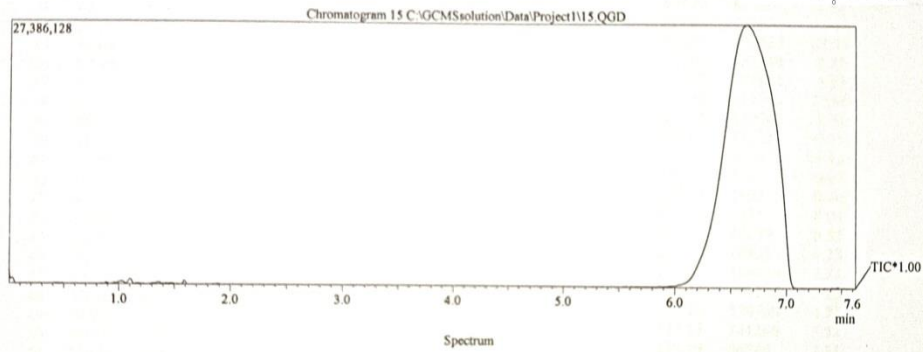

Line#:1 R.Time 6.6(Scan#:797)  
 MassPeaks:463  
 RawMode:Single 6.6(797) BasePeak:265(2560666)  
 BG Mode:None Group 1 - Event 1

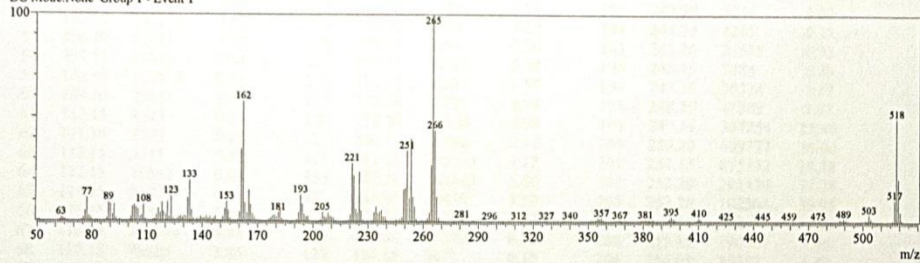

Mass Table  
 Line#:1 R.Time:6.6(Scan#:797)  
 MassPeaks:463  
 RawMode:Single 6.6(797) BasePeak:265(2560666)  
 BG Mode:None Group 1 - Event 1

| # | m/z   | Abs. In | Rel. Int. | # | m/z   | Abs. In | Rel. Int. | # | m/z   | Abs. In | Rel. Int. |
|---|-------|---------|-----------|---|-------|---------|-----------|---|-------|---------|-----------|
| 1 | 50.00 | 17425   | 0.68      | 4 | 53.00 | 6142    | 0.24      | 7 | 56.00 | 586     | 0.02      |
| 2 | 51.00 | 19146   | 0.75      | 5 | 54.05 | 1690    | 0.07      | 8 | 57.00 | 545     | 0.02      |
| 3 | 52.00 | 7697    | 0.30      | 6 | 55.05 | 3764    | 0.15      | 9 | 58.00 | 318     | 0.01      |

**(E)-2-((4-Cinnamoylphenoxy)methyl)-3-(4-fluorophenyl)quinazolin-4(3H)-one (20).**

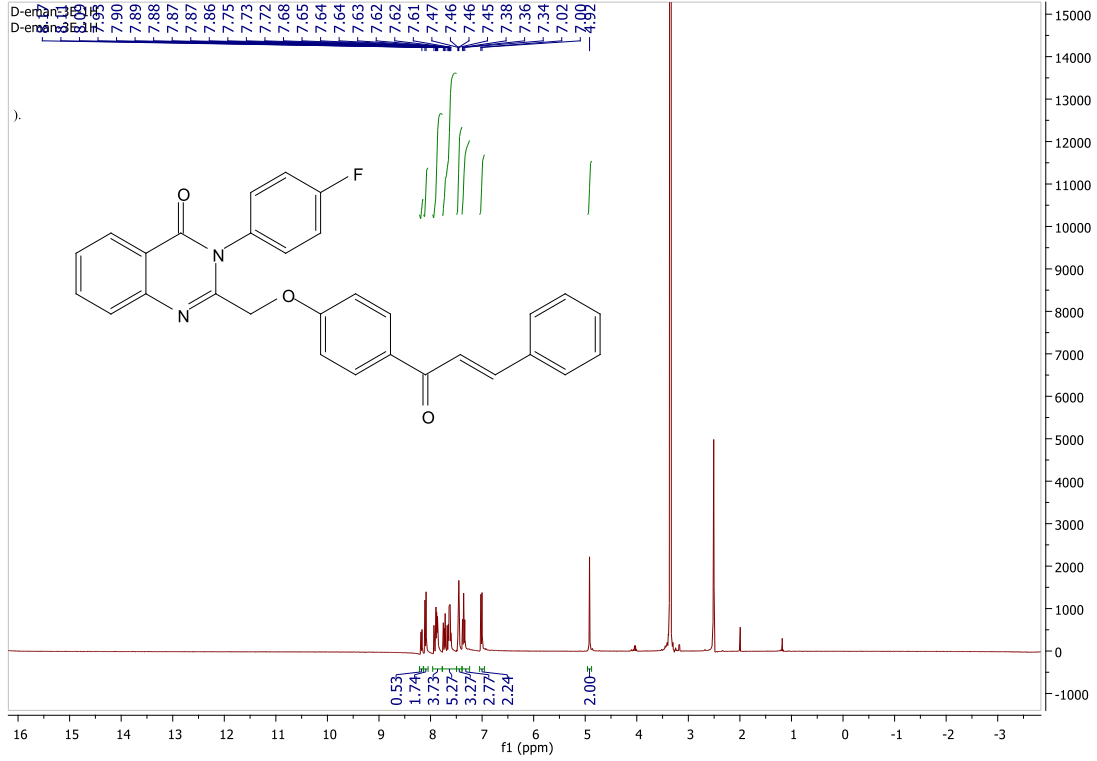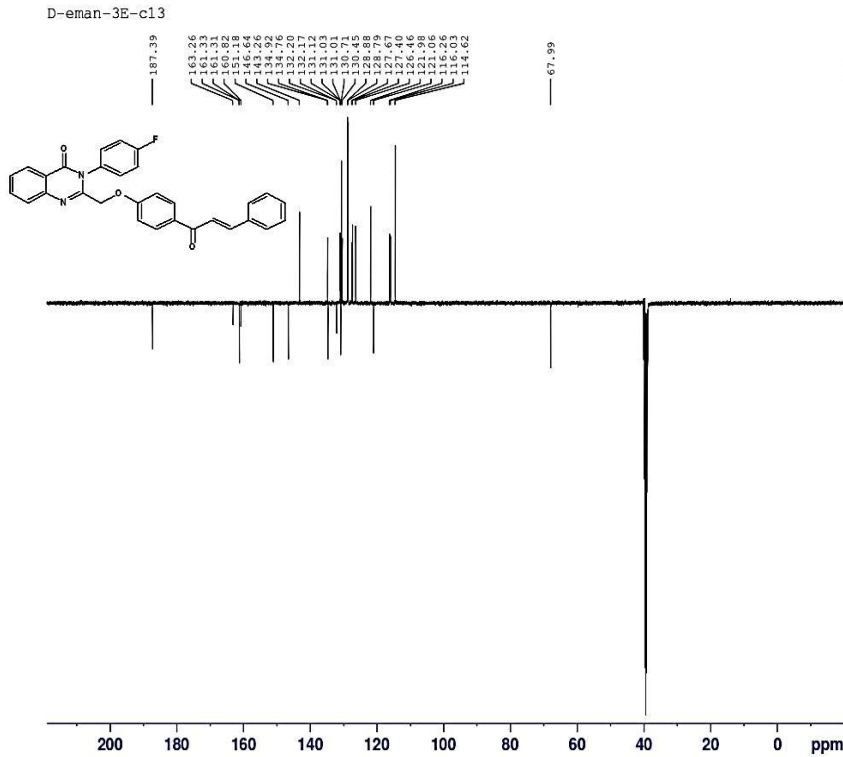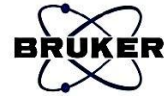

```

Current Data Parameters
NAME: 0-eman-3E-c13
EXPNO: 10
PROCNO: 1

F2 - Acquisition Parameters
Date_: 20221117
Time: 3.34
INSTRUM: spect
PROBHD: 5 mm PABBO 1H/
PULPROG: zgpg30
TD: 65536
SOLVENT: DMSO
NS: 2000
DS: 4
SFO: 240.361 Hz
FIDRES: 0.364788 Hz
AQ: 1.352488 sec
RG: 201.81
SM: 20.800 usec
DE: 6.50 usec
TE: 299.2 K
CHFT2: 145.000000
CHFT11: 1.000000
DQ: 2.0000000 sec
DD: 0.00689653 sec
TD0: 1

***** CHANNEL f1 *****
NUC1: 13C
P1: 10.00 usec
P2: 20.00 usec
PL1: 50.0000000 W

***** CHANNEL f2 *****
NUC2: 1H
P1: 12.768 usec
P2: 90.00 usec
PL1: 10.3939362 W
PL12: 0.28889000 W

F2 - Processing parameters
SI: 32768
SF: 100.6128170 MHz
WDW: EM
SSB: 0
LB: 1.00 Hz
GB: 0
PC: 1.40
    
```



**Cairo University  
Micro Analytical Center**

**DI Analysis  
Shimadzu Qp-2010 Plus**

Sample Information  
 Analyzed by : Dr. Mai Younis  
 Analyzed : 21/01/2007 05:13:10  
 Sample Name : 3E  
 Sample ID :  
 Customer Name : Dr. Eman Ashraf - Pharmacy - Zagazik  
 Data File : C:\GCMSolution\Data\Project1\3E.QGD  
 Org. Data File : C:\GCMSolution\Data\Project1\3E.QGD  
 Method File : C:\GCMSolution\Data\Project1\High Temperature Op  
 Org. Method File : C:\GCMSolution\Data\Project1\High Temperature Op  
 Report File :  
 Tuning File : C:\GCMSolution\System\Tune1\default.qgt  
 \$Endl\$ Modified by : Dr. Mai Younis  
 Modified : 21/01/2007 05:19:06

Method  
 Analytical Line 1  
 IonSourceTemp : 250.00 °C  
 [MS Table]  
 -Group 1 - Event 1-  
 Start Time : 0.00min  
 End Time : 10.00min  
 ACQ Mode : Scan  
 Event Time : 0.50sec  
 Scan Speed : 1250  
 Start m/z : 50.00  
 End m/z : 600.00  
 Electron Voltage : 70 eV  
 Ionization Mode : EI

*Dr. Mai Younis*  
  
 3E

C:\GCMSolution\Data\Project1\3E.QGD

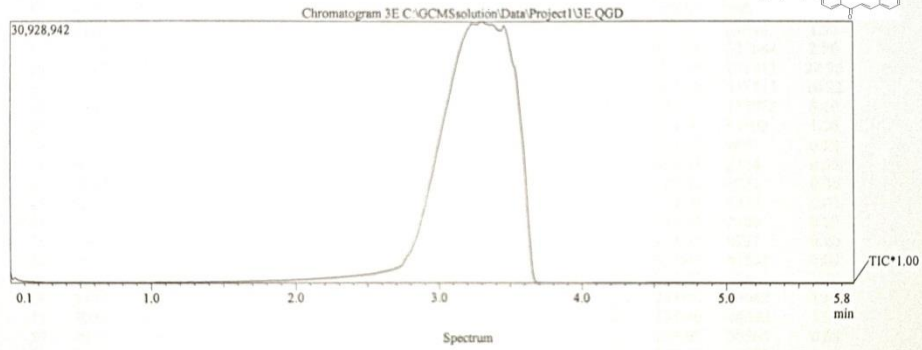

Line#:1 R.Time:3.3(Scan#:396)  
 MassPeaks:424  
 RawMode:Single 3.3(396) BasePeak:253(4476991)  
 BG Mode:None Group 1 - Event 1

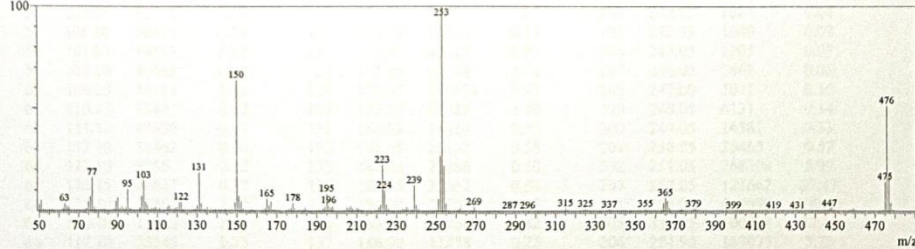

Mass Table  
 Line#:1 R.Time:3.3(Scan#:396)  
 MassPeaks:424  
 RawMode:Single 3.3(396) BasePeak:253(4476991)  
 BG Mode:None Group 1 - Event 1

| # | m/z   | Abs. In | Rel. Int. | # | m/z   | Abs. In | Rel. Int. | # | m/z   | Abs. In | Rel. Int. |
|---|-------|---------|-----------|---|-------|---------|-----------|---|-------|---------|-----------|
| 1 | 50.05 | 140174  | 3.13      | 4 | 53.00 | 25855   | 0.58      | 7 | 56.05 | 8203    | 0.18      |
| 2 | 51.00 | 226548  | 5.06      | 5 | 54.05 | 6734    | 0.15      | 8 | 57.00 | 27977   | 0.62      |
| 3 | 52.00 | 41111   | 0.92      | 6 | 55.00 | 27657   | 0.62      | 9 | 58.00 | 4298    | 0.10      |

**(E)-2-((4-(3-(4-Chlorophenyl)acryloyl)phenoxy)methyl)-3-(4-fluorophenyl)quinazolin-4(3H)-one**  
**(21).**

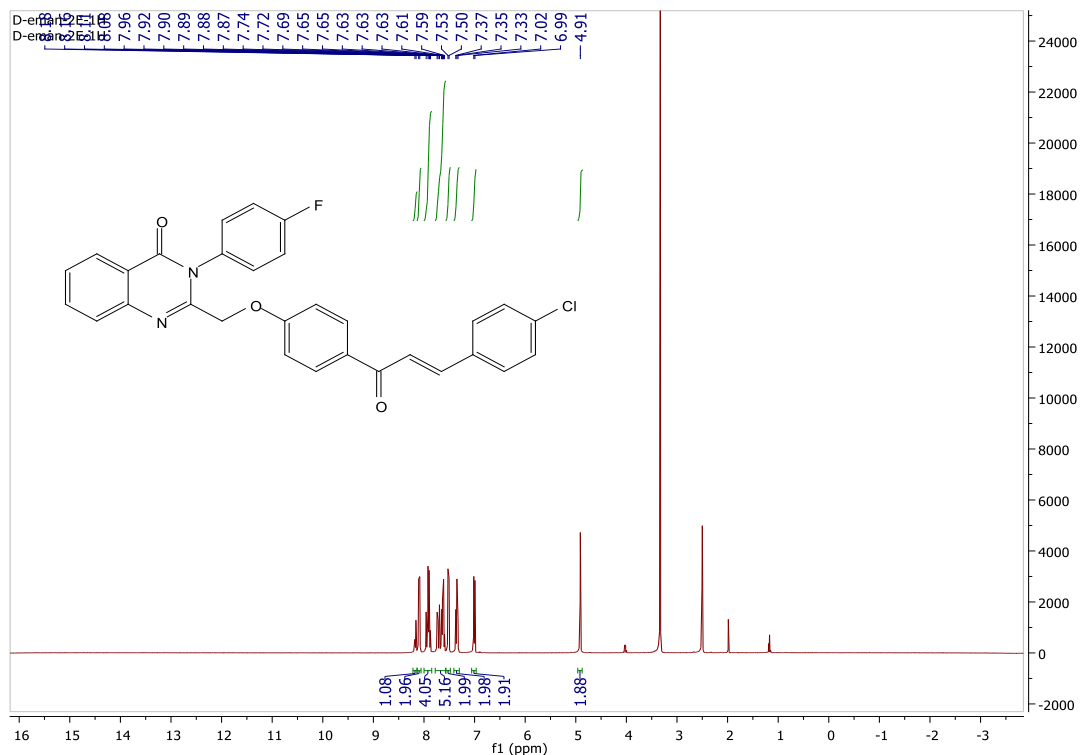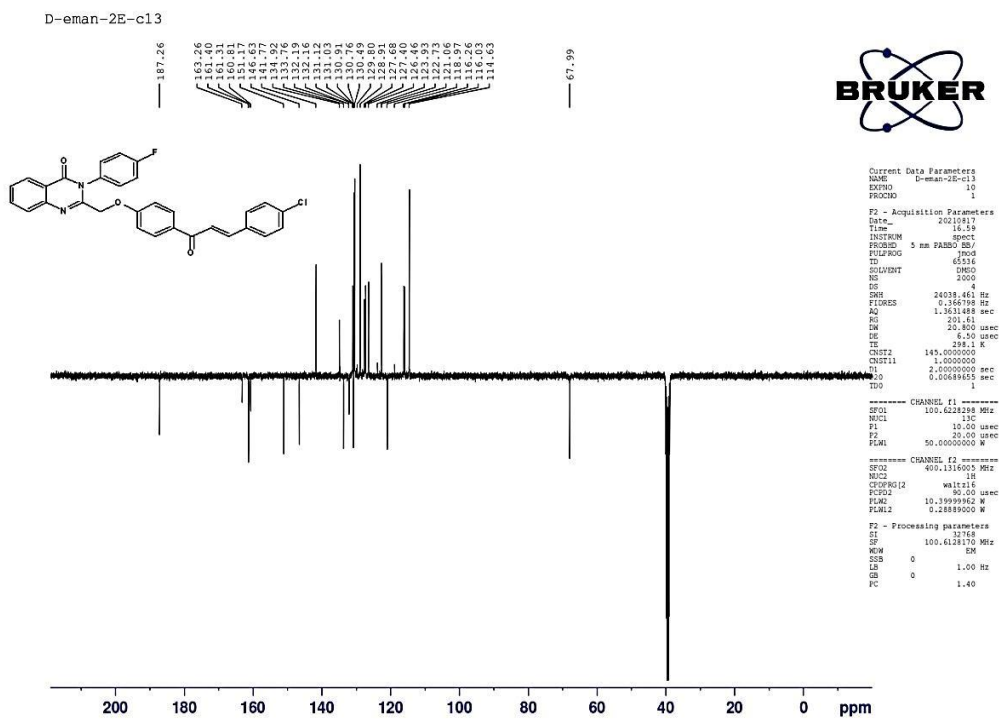

```

Current Data Parameters
NAME: D-eman-2E-c13
EXPNO: 10
PROCNO: 1

F2 - Acquisition Parameters
Date_ : 20210817
Time : 16.39
INSTRUM : spect
PROBHD : 5 mm PABBO QNP
PULPROG : gpmo
TD : 65536
SOLVENT : DMSO
NS : 2500
DS : 4
SHE : 24038.461 Hz
FIDRES : 0.366788 Hz
AQ : 1.361488 sec
RG : 201.61
DE : 30.800 usec
SE : 6.50 usec
TE : 298.1 K
CST2 : 145.000000
CST11 : 1.000000
CST12 : 2.60000000 sec
SFO : 0.00689655 sec
TD0 : 1

===== CHANNEL f1 =====
SFO1 : 100.628168 MHz
NUC1 : 13C
P1 : 10.00 usec
P2 : 30.00 usec
PLM1 : 50.00000000 W

===== CHANNEL f2 =====
SFO2 : 400.1315005 MHz
NUC2 : 1H
CPCPRG2 : waltz16
PCPD2 : 90.00 usec
PLM2 : 10.39999962 W
PLM12 : 0.28889000 W

F2 - Processing parameters
SI : 32768
SF : 100.6128170 MHz
WDW : RM
SSB : 0
GB : 0
PC : 1.40
    
```

**Cairo University  
Micro Analytical Center**

**DI Analysis  
Shimadzu Qp-2010 Plus**

Sample Information  
 Analyzed by : Dr. Mai Younis  
 Analyzed : 21/01/2007 05:06:59  
 Sample Name : 2E  
 Sample ID :  
 Customer Name : Dr. Eman Ashraf - Pharmacy - Zagazik  
 Data File : C:\GCMSolution\Data\Project1\2E.QGD  
 Org Data File : C:\GCMSolution\Data\Project1\2E.QGD  
 Method File : C:\GCMSolution\Data\Project1\High Temperature Op  
 Org Method File : C:\GCMSolution\Data\Project1\High Temperature Op  
 Report File :  
 Tuning File : C:\GCMSolution\SystemTune1\default.qgt  
 \$Endf\$Modified by : Dr. Mai Younis  
 Modified : 21/01/2007 05:10:47

Method  
 Analytical Line 1  
 IonSourceTemp :250.00 °C  
 [MS Table]  
 -Group 1 - Event 1-  
 Start Time :0.00min  
 End Time :10.00min  
 ACQ Mode :Scan  
 Event Time :0.50sec  
 Scan Speed :1250  
 Start m/z :50.00  
 End m/z :600.00  
 Electron Voltage :70 eV  
 Ionization Mode :EI

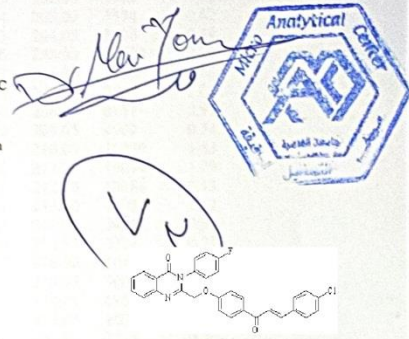

C:\GCMSolution\Data\Project1\2E.QGD

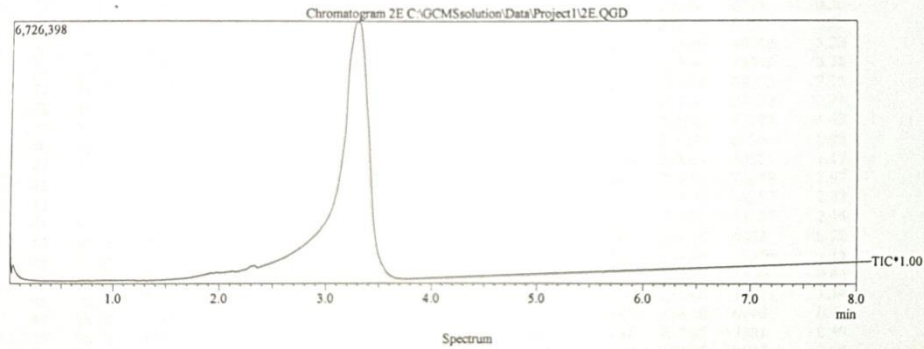

Line#1 R.Time:3.3(Scan#:397)  
 MassPeaks:395  
 RawMode:Single 3.3(397) BasePeak:253(899505)  
 BG Mode:None Group 1 - Event 1

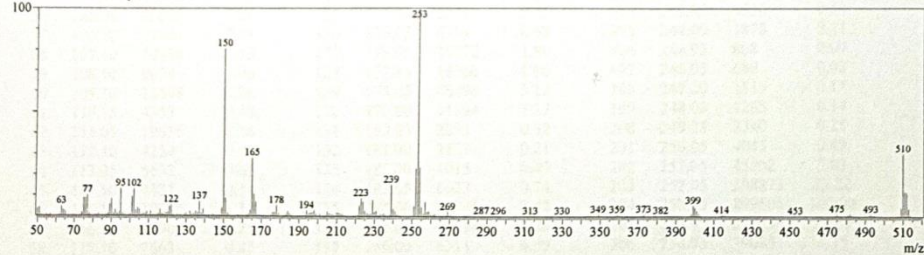

Mass Table

Line#1 R.Time:3.3(Scan#:397)  
 MassPeaks:395  
 RawMode:Single 3.3(397) BasePeak:253(899505)  
 BG Mode:None Group 1 - Event 1

| # | m/z   | Abs. In | Rel. Int. | # | m/z   | Abs. In | Rel. Int. | # | m/z   | Abs. In | Rel. Int. |
|---|-------|---------|-----------|---|-------|---------|-----------|---|-------|---------|-----------|
| 1 | 50.05 | 33093   | 3.68      | 4 | 53.00 | 4713    | 0.52      | 7 | 56.05 | 2587    | 0.29      |
| 2 | 51.00 | 38110   | 4.24      | 5 | 54.05 | 1860    | 0.21      | 8 | 57.00 | 8711    | 0.97      |
| 3 | 52.00 | 7382    | 0.82      | 6 | 55.00 | 6625    | 0.74      | 9 | 58.05 | 1112    | 0.12      |

**(E)-3-(4-Fluorophenyl)-2-((4-(3-(4-nitrophenyl)acryloyl)phenoxy)methyl)quinazolin-4(3H)-one (22).**

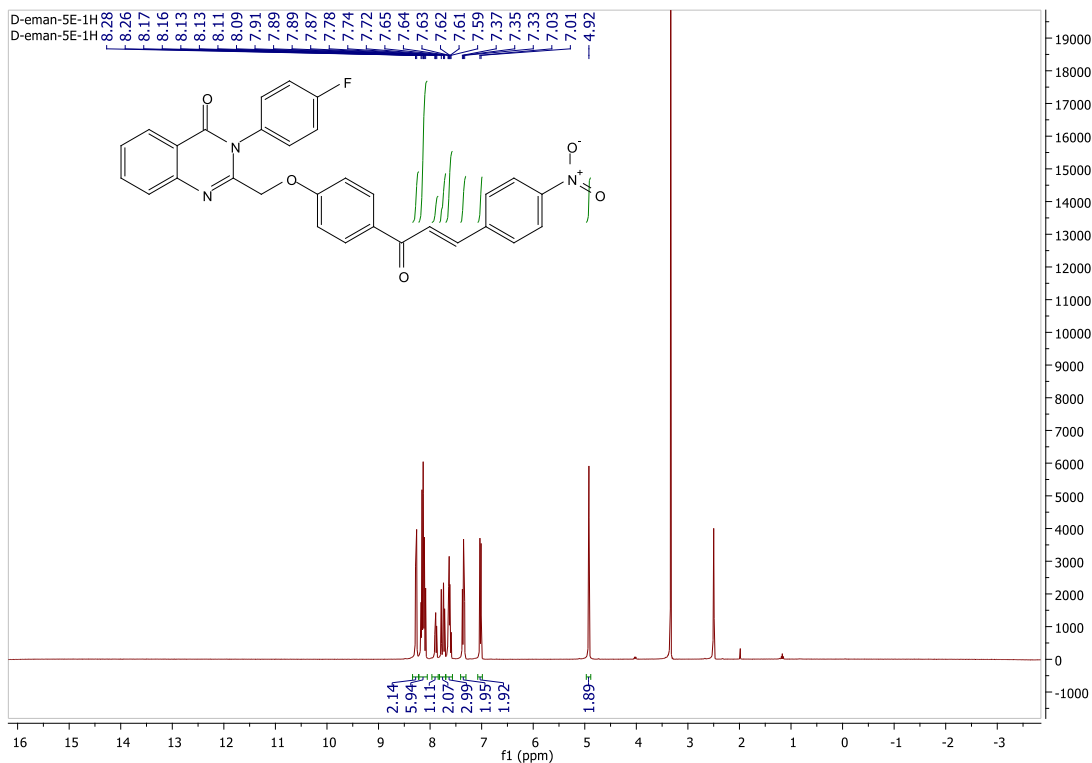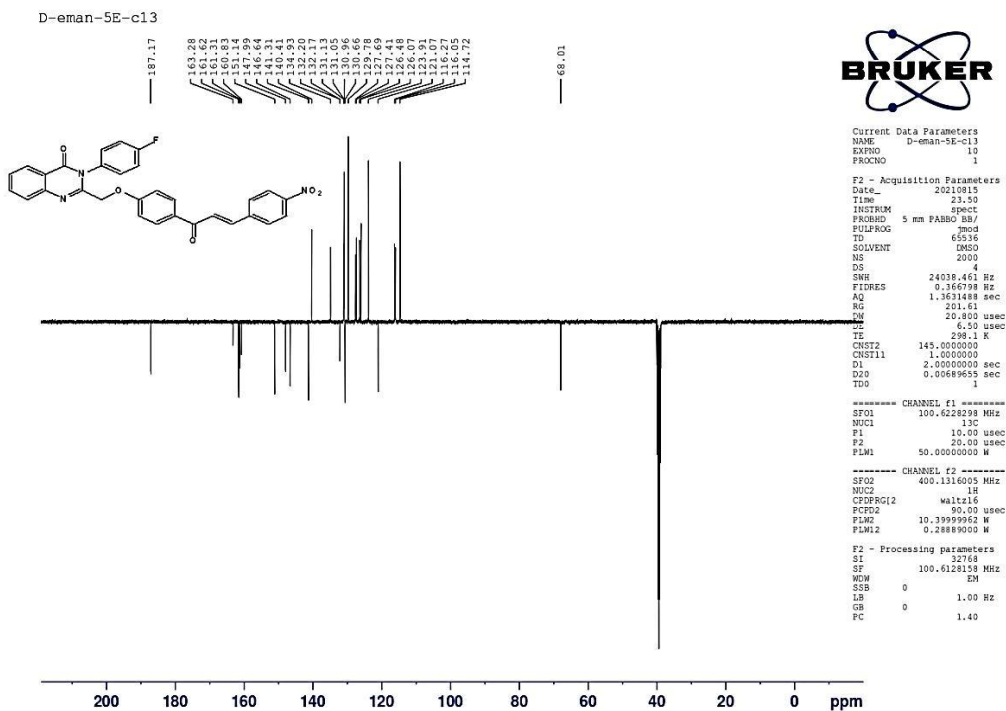

**Cairo University  
Micro Analytical Center**

**DI Analysis  
Shimadzu Qp-2010 Plus**

Sample Information  
 Analyzed by : Dr. Mai Younis  
 Analyzed : 21/01/2007 05:25:48  
 Sample Name : 5E  
 Sample ID :  
 Customer Name : Dr. Eman Ashraf - Pharmacy - Zagazik  
 Data File : C:\GCMSolution\Data\Project1\5E.QGD  
 Org Data File : C:\GCMSolution\Data\Project1\5E.QGD  
 Method File : C:\GCMSolution\Data\Project1\High Temperature Op  
 Org Method File : C:\GCMSolution\Data\Project1\High Temperature Op  
 Report File :  
 Tuning File : C:\GCMSolution\System\Tune1\\_default.qgt  
 \$EndIf\$ Modified by : Dr. Mai Younis  
 Modified : 21/01/2007 05:31:16

Method  
 Analytical Line 1  
 IonSourceTemp : 250.00 °C  
 [MS Table]  
 -Group 1 - Event 1-  
 Start Time : 0.00min  
 End Time : 10.00min  
 ACQ Mode : Scan  
 Event Time : 0.50sec  
 Scan Speed : 1250  
 Start m/z : 50.00  
 End m/z : 600.00  
 Electron Voltage : 70 eV  
 Ionization Mode : EI

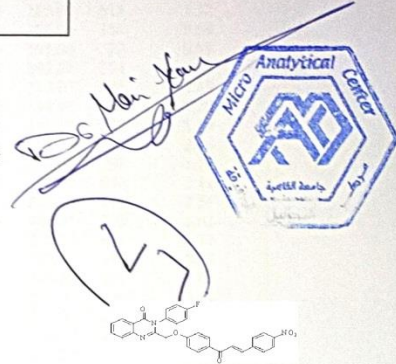

C:\GCMSolution\Data\Project1\5E.QGD

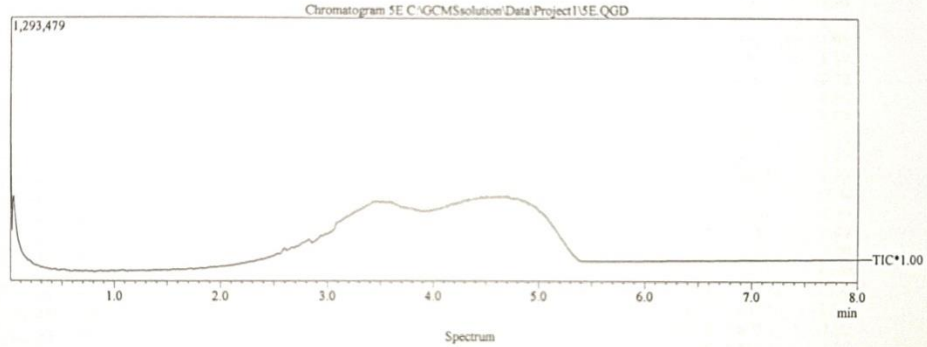

Line#:1 R.Time:3.5(Scan#:419)  
 MassPeaks:183  
 RawMode:Single 3.5(419) BasePeak:150(46495)  
 BG Mode:None Group 1 - Event 1

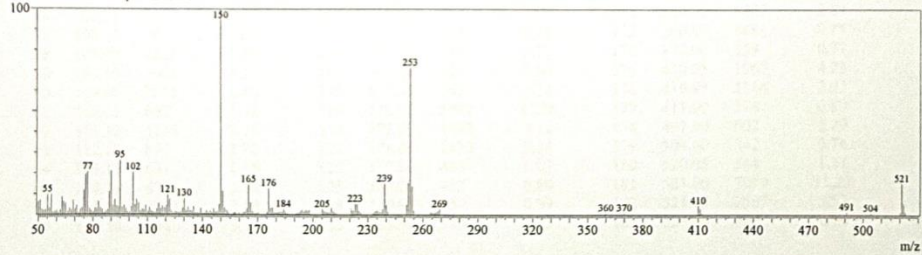

Mass Table  
 Line#:1 R.Time:3.5(Scan#:419)  
 MassPeaks:183  
 RawMode:Single 3.5(419) BasePeak:150(46495)  
 BG Mode:None Group 1 - Event 1

| # | m/z   | Abs. In | Rel. Int. | # | m/z   | Abs. In | Rel. Int. | # | m/z   | Abs. In | Rel. Int. |
|---|-------|---------|-----------|---|-------|---------|-----------|---|-------|---------|-----------|
| 1 | 50.00 | 2932    | 6.31      | 4 | 53.00 | 969     | 2.08      | 7 | 56.05 | 1467    | 3.16      |
| 2 | 51.00 | 3246    | 6.98      | 5 | 54.05 | 1094    | 2.35      | 8 | 57.05 | 4575    | 9.84      |
| 3 | 52.00 | 1249    | 2.69      | 6 | 55.05 | 4464    | 9.60      | 9 | 58.00 | 612     | 1.32      |

**(E)-3-(4-Fluorophenyl)-2-((4-(3-(p-tolyl)acryloyl)phenoxy)methyl)quinazolin-4(3H)-one (23).**

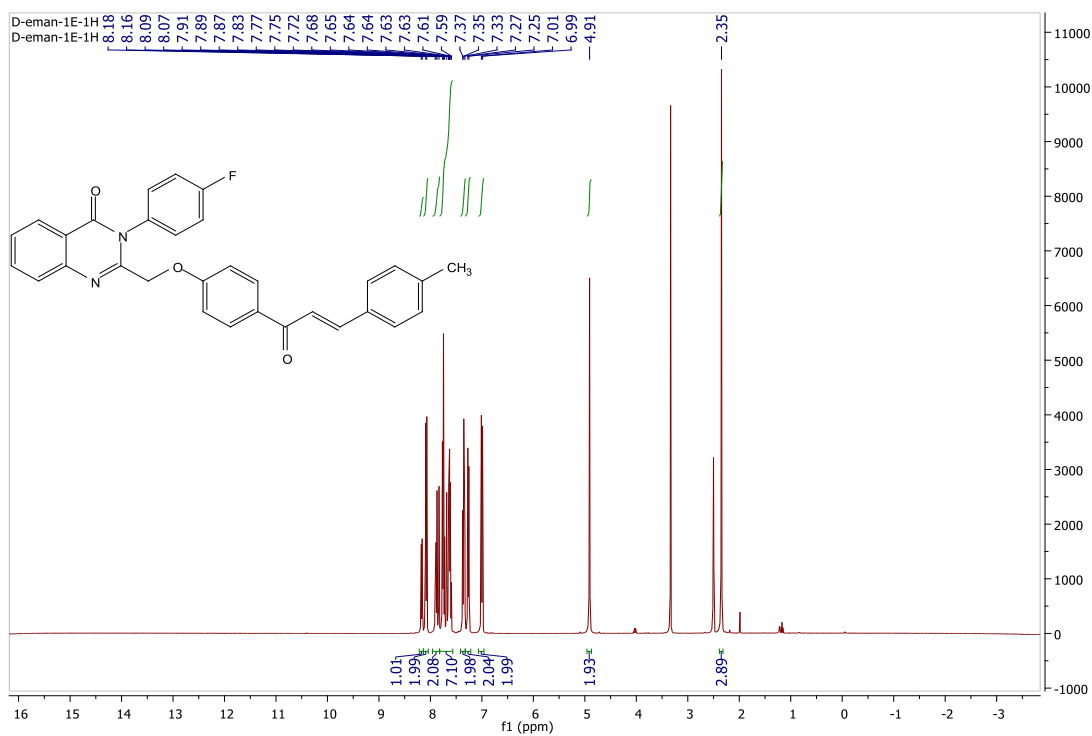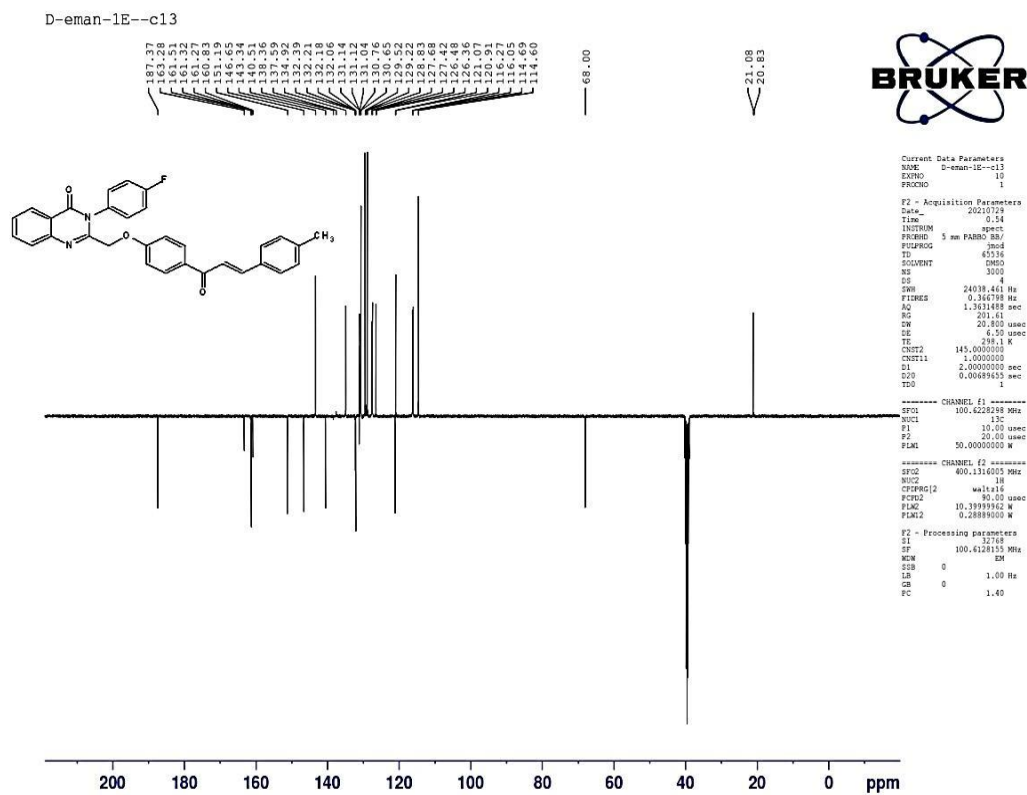

**Cairo University  
Micro Analytical Center**

**DI Analysis  
Shimadzu Qp-2010 Plus**

Sample Information  
 Analyzed by : Dr. Mai Younis  
 Analyzed : 21/01/2007 05:01:16  
 Sample Name : 1E  
 Sample ID :  
 Customer Name : Dr. Eman Ashraf - Pharmacy - Zagazik  
 Data File : C:\GCMSolution\Data\Project1\1E.QGD  
 Org. Data File : C:\GCMSolution\Data\Project1\1E.QGD  
 Method File : C:\GCMSolution\Data\Project1\High Temperature Op  
 Org. Method File : C:\GCMSolution\Data\Project1\High Temperature Op  
 Report File :  
 Tuning File : C:\GCMSolution\System\Tune1\\_default.qgt  
 \$EndIt\$ Modified by : Dr. Mai Younis  
 Modified : 21/01/2007 05:04:29

Method  
 Analytical Line 1  
 IonSourceTemp : 250.00 °C  
 [MS Table]  
 --Group 1 - Event 1--  
 Start Time : 0.00min  
 End Time : 10.00min  
 ACQ Mode : Scan  
 Event Time : 0.50sec  
 Scan Speed : 1250  
 Start m/z : 50.00  
 End m/z : 600.00  
 Electron Voltage : 70 eV  
 Ionization Mode : EI

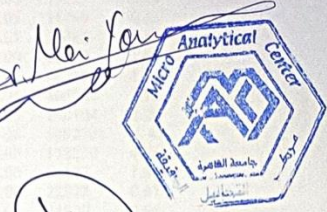

C:\GCMSolution\Data\Project1\1E.QGD

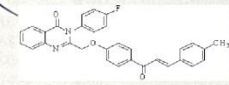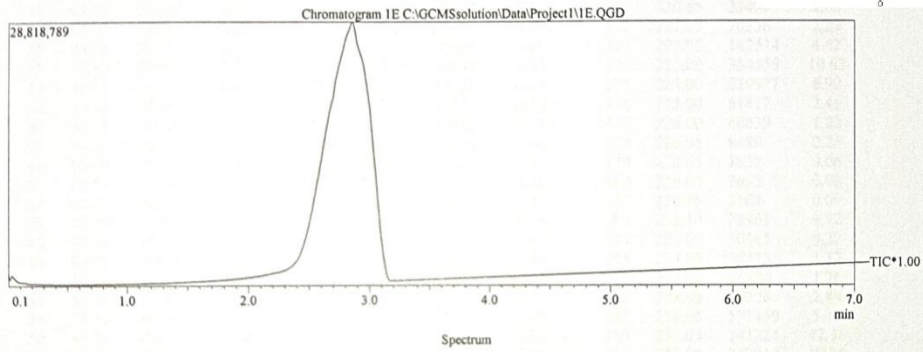

Line#:1 R.Time:2.9(Scan#:345)  
 MassPeaks:436  
 RawMode:Single 2.9(345) BasePeak:253(3334153)  
 BG Mode:None Group 1 - Event 1

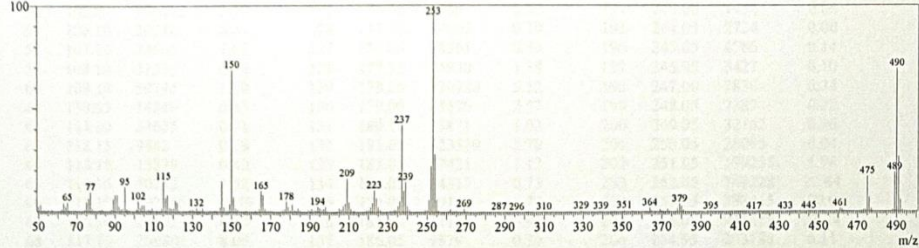

Mass Table  
 Line#:1 R.Time:2.9(Scan#:345)  
 MassPeaks:436  
 RawMode:Single 2.9(345) BasePeak:253(3334153)  
 BG Mode:None Group 1 - Event 1

| # | m/z   | Abs. In | Rel. Int. | # | m/z   | Abs. In | Rel. Int. | # | m/z   | Abs. In | Rel. Int. |
|---|-------|---------|-----------|---|-------|---------|-----------|---|-------|---------|-----------|
| 1 | 50.00 | 86385   | 2.59      | 4 | 53.00 | 23420   | 0.70      | 7 | 56.05 | 8847    | 0.27      |
| 2 | 51.00 | 107098  | 3.21      | 5 | 54.05 | 6944    | 0.21      | 8 | 57.00 | 30692   | 0.92      |
| 3 | 52.05 | 22026   | 0.66      | 6 | 55.00 | 29849   | 0.90      | 9 | 58.00 | 4121    | 0.12      |

**(E)-3-(4-Fluorophenyl)-2-((4-(3-(4-methoxyphenyl)acryloyl)phenoxy)methyl)quinazolin-4(3H)-one (24).**

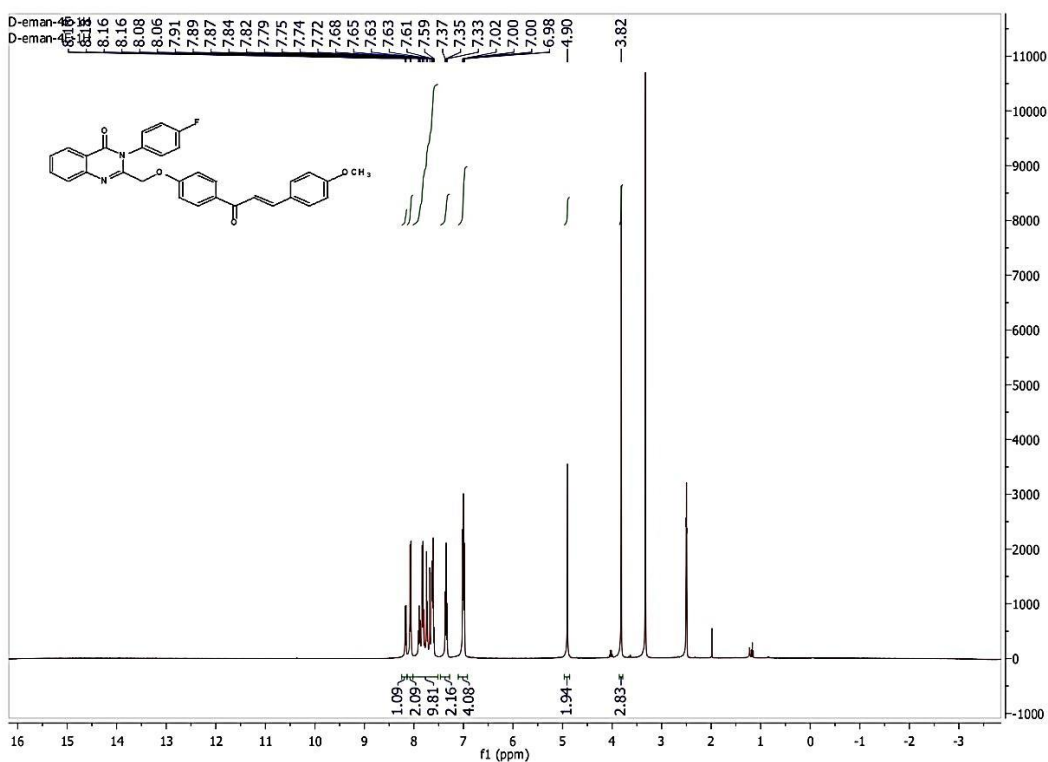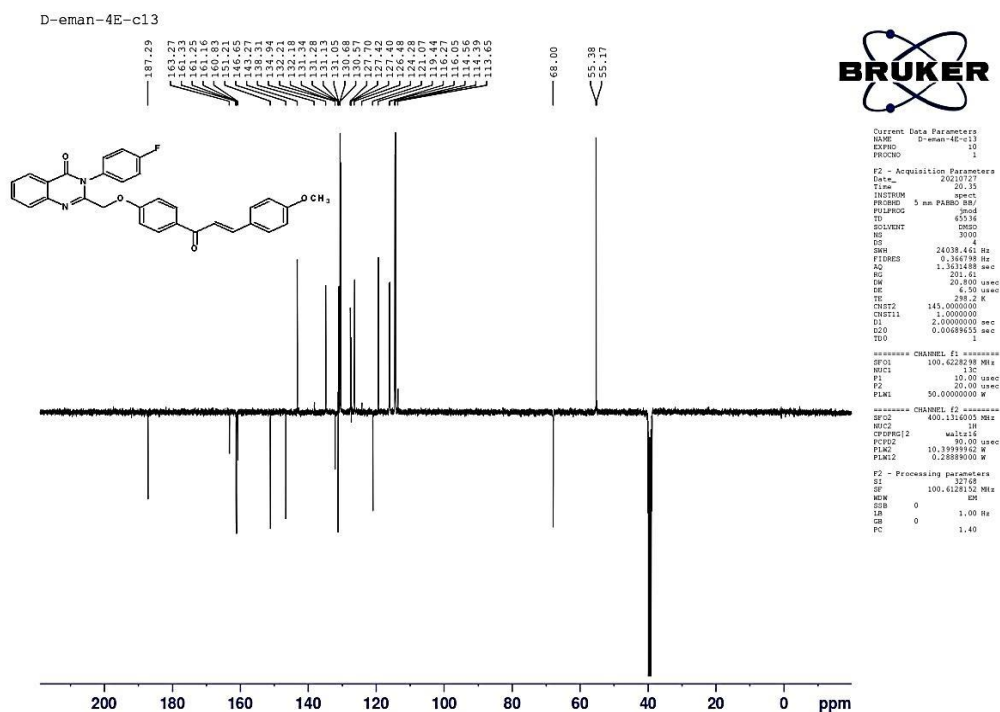



**Cairo University  
Micro Analytical Center**

**DI Analysis  
Shimadzu Qp-2010 Plus**

Sample Information  
 Analyzed by : Dr. Mai Younis  
 Analyzed : 21/01/2007 05:21:01  
 Sample Name : 4E  
 Sample ID :  
 Customer Name : Dr. Eman Ashraf - Pharmacy - Zagazik  
 Data File : C:\GCMSsolution\Data\Project1\4E.QGD  
 Org Data File : C:\GCMSsolution\Data\Project1\4E.QGD  
 Method File : C:\GCMSsolution\Data\Project1\High Temperature Op  
 Org Method File : C:\GCMSsolution\Data\Project1\High Temperature Op  
 Report File :  
 Tuning File : C:\GCMSsolution\System\Tune1\_default.qgt  
 \$EndIt\$ Modified by : Dr. Mai Younis  
 Modified : 21/01/2007 05:24:08

Method  
 Analytical Line 1  
 IonSourceTemp : 250.00 °C  
 [MS Table]  
 -Group 1 - Event 1-  
 Start Time : 0.00min  
 End Time : 10.00min  
 ACQ Mode : Scan  
 Event Time : 0.50sec  
 Scan Speed : 1250  
 Start m/z : 50.00  
 End m/z : 600.00  
 Electron Voltage : 70 eV  
 Ionization Mode : EI

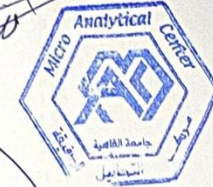

C:\GCMSsolution\Data\Project1\4E.QGD

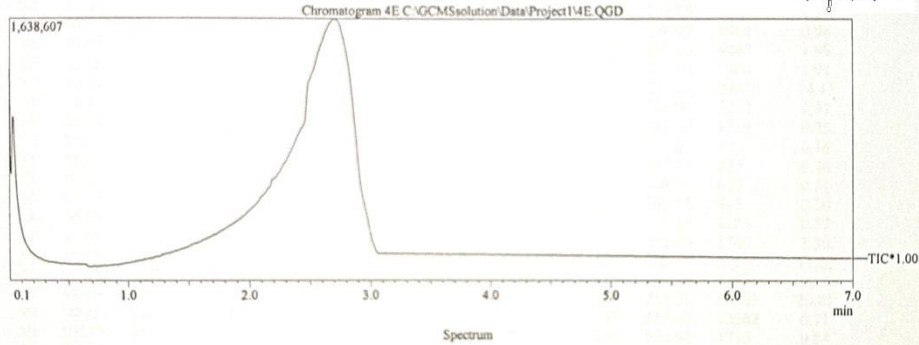

Line#:1 R.Time:2.7(Scan#:324)  
 MassPeaks:232  
 RawMode:Single 2.7(324) BasePeak:253(204044)  
 BG Mode:None Group 1 - Event 1

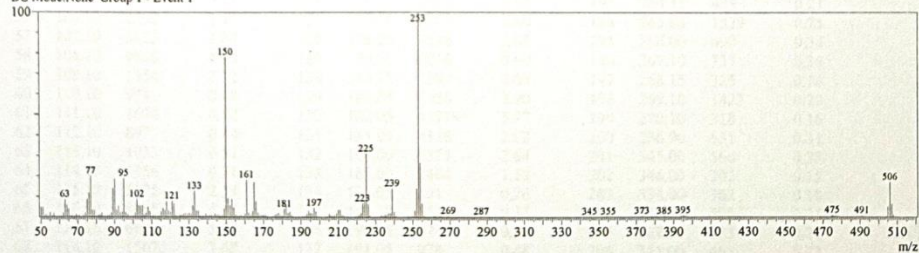

Mass Table  
 Line#:1 R.Time:2.7(Scan#:324)  
 MassPeaks:232  
 RawMode:Single 2.7(324) BasePeak:253(204044)  
 BG Mode:None Group 1 - Event 1

| # | m/z   | Abs. In | Rel. Int. | # | m/z   | Abs. In | Rel. Int. | # | m/z   | Abs. In | Rel. Int. |
|---|-------|---------|-----------|---|-------|---------|-----------|---|-------|---------|-----------|
| 1 | 50.00 | 9585    | 4.70      | 4 | 53.00 | 2638    | 1.29      | 7 | 56.05 | 1361    | 0.67      |
| 2 | 51.00 | 9975    | 4.89      | 5 | 54.05 | 1233    | 0.60      | 8 | 57.00 | 3884    | 1.90      |
| 3 | 52.05 | 2537    | 1.24      | 6 | 55.00 | 4466    | 2.19      | 9 | 57.95 | 613     | 0.30      |

**(E)-2-((4-(3-(3,4-Dimethoxyphenyl)acryloyl)phenoxy)methyl)-3-(4-fluorophenyl)quinazolin-4(3H)-one (25).**

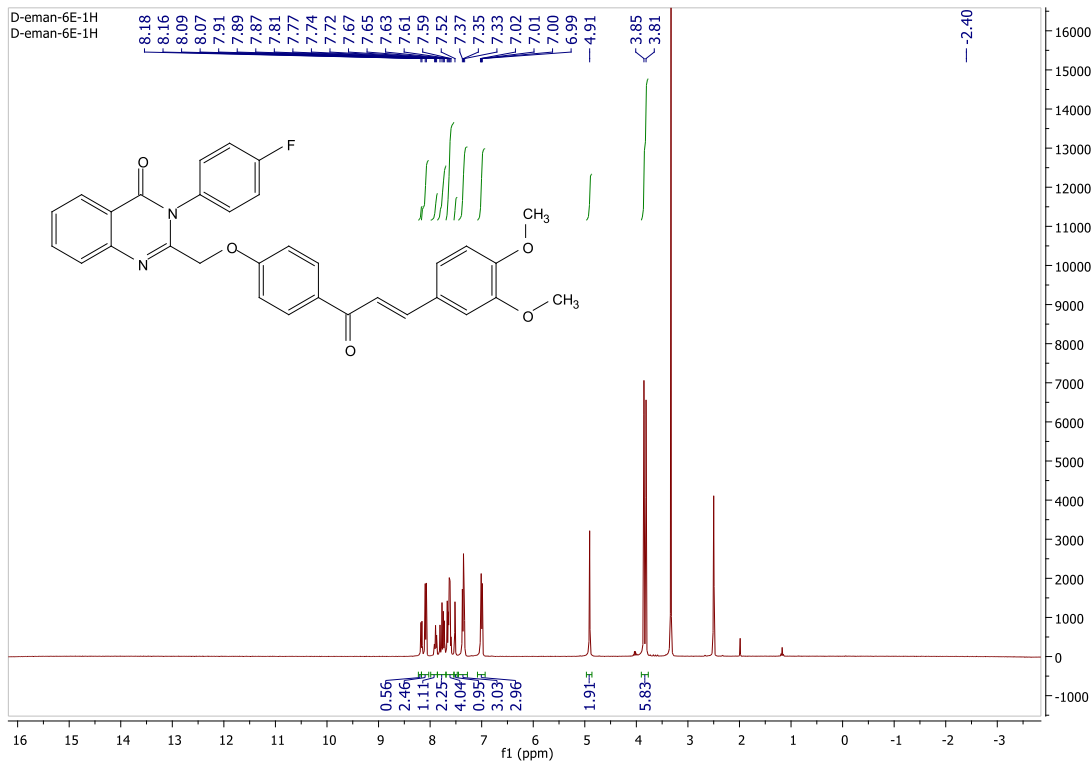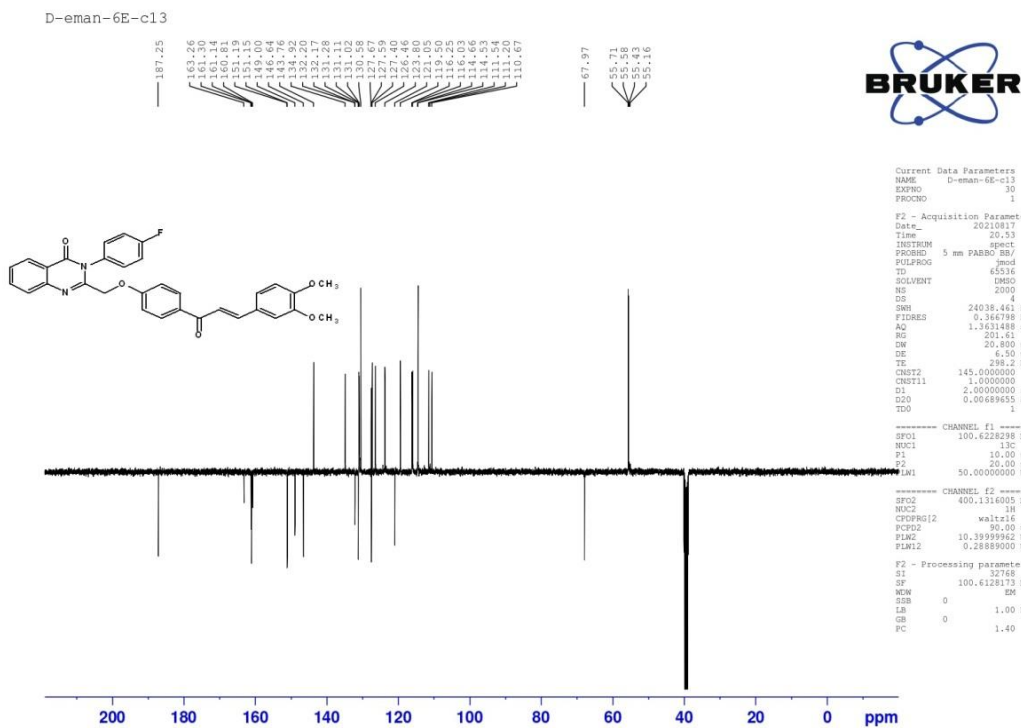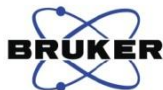

Current Data Parameters  
NAME D-eman-6E-c13  
EXPNO 30  
PROCNO 1

F2 - Acquisition Parameters  
Date\_ 20210817  
Time 20:53  
INSTRUM spect  
PROBHD 5 mm PABBO BBI  
PULPROG gmod  
TD 65536  
SOLVENT DMSO  
NS 2000  
DS 4  
SWH 24038.461 Hz  
FIDRES 0.364798 Hz  
AQ 1.3631488 sec  
RG 201.41  
DW 20.800 usec  
DE 6.50 usec  
TE 298.2 K  
CHST2 145.000000  
CNST1 1.000000  
D1 2.0000000 sec  
D20 0.00689655 sec  
TDO

----- CHANNEL f1 -----  
SFO1 100.6228298 MHz  
NUC1 13C  
P1 10.00 usec  
PS 20.00 usec  
PL1 50.0000000 W

----- CHANNEL f2 -----  
SFO2 400.1316005 MHz  
NUC2 1H  
CFDPRG2 waltz16  
PCPD2 90.00 usec  
PLR2 10.3999962 W  
PLM12 0.28889000 W

F2 - Processing parameters  
SI 32768  
SF 100.6128173 MHz  
WDW EM  
SSB 0  
LA 1.00 Hz  
GB 0  
PC 1.40

**Cairo University  
Micro Analytical Center**

**DI Analysis  
Shimadzu Qp-2010 Plus**

Sample Information  
 Analyzed by : Dr. Mai Younis  
 Analyzed : 21/01/2007 05:33:10  
 Sample Name : 6E  
 Sample ID :  
 Customer Name : Dr. Eman Ashraf - Pharmacy - Zagazik  
 Data File : C:\GCMSolution\Data\Project1\6E.QGD  
 Org Data File : C:\GCMSolution\Data\Project1\6E.QGD  
 Method File : C:\GCMSolution\Data\Project1\High Temperature Op  
 Org Method File : C:\GCMSolution\Data\Project1\High Temperature Op  
 Report File :  
 Tuning File : C:\GCMSolution\System\Tune1\\_default.qgt  
 \$EndIf\$ Modified by : Dr. Mai Younis  
 Modified : 21/01/2007 05:36:51

Method  
 Analytical Line 1  
 IonSourceTemp : 250.00 °C  
 [MS Table]  
 --Group 1 - Event 1--  
 Start Time : 0.00min  
 End Time : 10.00min  
 ACQ Mode : Scan  
 Event Time : 0.50sec  
 Scan Speed : 1250  
 Start m/z : 50.00  
 End m/z : 600.00  
 Electron Voltage : 70 eV  
 Ionization Mode : EI

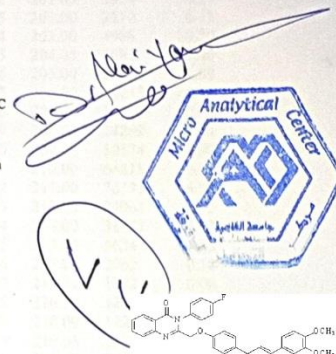

C:\GCMSolution\Data\Project1\6E.QGD

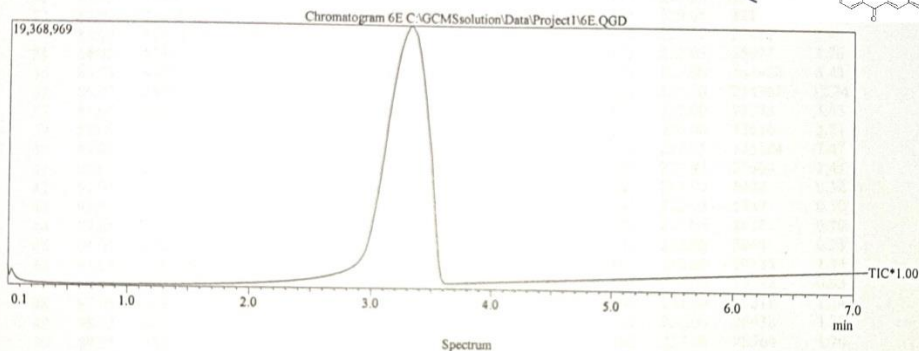

Line#1 R.Time:3.3(Scan#402)  
 MassPeaks:465  
 RawMode:Single 3.3(402) BasePeak:253(1683025)  
 BG Mode:None Group 1 - Event 1

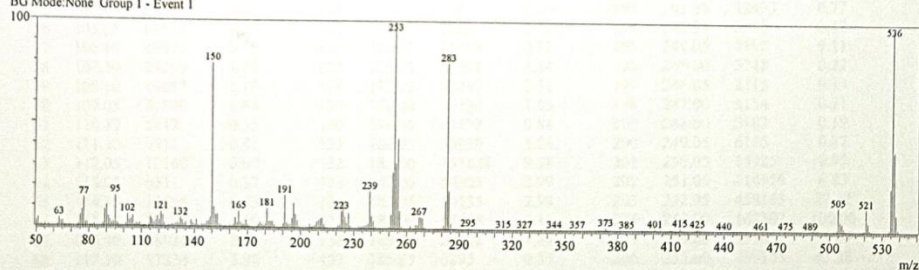

Mass Table  
 Line#1 R.Time:3.3(Scan#402)  
 MassPeaks:465  
 RawMode:Single 3.3(402) BasePeak:253(1683025)  
 BG Mode:None Group 1 - Event 1

| # | m/z   | Abs. In | Rel. Int. | # | m/z   | Abs. In | Rel. Int. | # | m/z   | Abs. In | Rel. Int. |
|---|-------|---------|-----------|---|-------|---------|-----------|---|-------|---------|-----------|
| 1 | 50.00 | 45487   | 2.70      | 4 | 53.00 | 14495   | 0.86      | 7 | 56.05 | 4669    | 0.28      |
| 2 | 51.00 | 69831   | 4.15      | 5 | 54.05 | 4429    | 0.26      | 8 | 57.00 | 15622   | 0.93      |
| 3 | 52.00 | 12178   | 0.72      | 6 | 55.00 | 22097   | 1.31      | 9 | 57.95 | 2172    | 0.13      |



## Cairo University Micro Analytical Center

### DI Analysis Shimadzu Qp-2010 Plus

**Sample Information**  
 Analyzed by : Dr. Mai Younis  
 Analyzed : 21/01/2007 03:06:07  
 Sample Name : 3C  
 Sample ID :  
 Customer Name : Dr. Eman Ashraf - Pharmacy - Zagazik  
 Data File : C:\GCMSsolution\Data\Project1\3C.QGD  
 Org Data File : C:\GCMSsolution\Data\Project1\3C.QGD  
 Method File : C:\GCMSsolution\Data\Project1\High Temperature Op  
 Org Method File : C:\GCMSsolution\Data\Project1\High Temperature Op  
 Report File : C:\GCMSsolution\System\Tune1\\_default.qgt  
 Tuning File :  
 \$EndIf\$Modified by : Dr. Mai Younis  
 Modified : 21/01/2007 03:12:45

**Method**  
 Analytical Line 1  
 IonSourceTemp : 250.00 °C  
 [MS Table]  
 --Group 1 - Event 1--  
 Start Time : 0.00min  
 End Time : 10.00min  
 ACQ Mode : Scan  
 Event Time : 0.50sec  
 Scan Speed : 1250  
 Start m/z : 50.00  
 End m/z : 600.00  
 Electron Voltage : 70 eV  
 Ionization Mode : EI

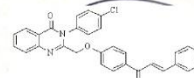

C:\GCMSsolution\Data\Project1\3C.QGD

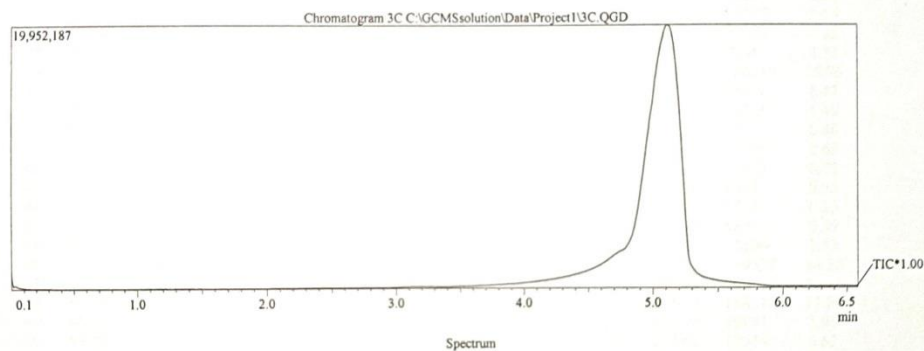

Line#:1 RTime:5.1(Scan#:615)  
 MassPeaks:432  
 RawMode:Single 5.1(615) BasePeak:269(1489914)  
 BG Mode:None Group 1 - Event 1

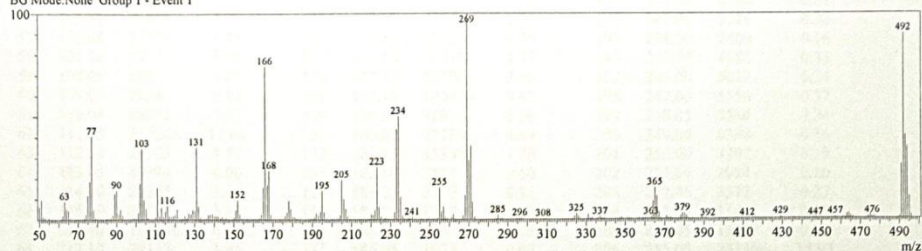

**Mass Table**  
 Line#:1 RTime:5.1(Scan#:615)  
 MassPeaks:432  
 RawMode:Single 5.1(615) BasePeak:269(1489914)  
 BG Mode:None Group 1 - Event 1

| # | m/z   | Abs. In | Rel. Int. | # | m/z   | Abs. In | Rel. Int. | # | m/z   | Abs. In | Rel. Int. |
|---|-------|---------|-----------|---|-------|---------|-----------|---|-------|---------|-----------|
| 1 | 50.00 | 92734   | 6.22      | 4 | 53.00 | 15207   | 1.02      | 7 | 56.05 | 1400    | 0.09      |
| 2 | 51.00 | 144671  | 9.71      | 5 | 54.05 | 2462    | 0.17      | 8 | 57.10 | 2260    | 0.15      |
| 3 | 52.00 | 26276   | 1.76      | 6 | 55.00 | 12166   | 0.82      | 9 | 57.95 | 1046    | 0.07      |

**(E)-3-(4-Chlorophenyl)-2-((4-(3-(4-chlorophenyl)acryloyl)phenoxy)methyl)quinazolin-4(3H)-one**  
(27).

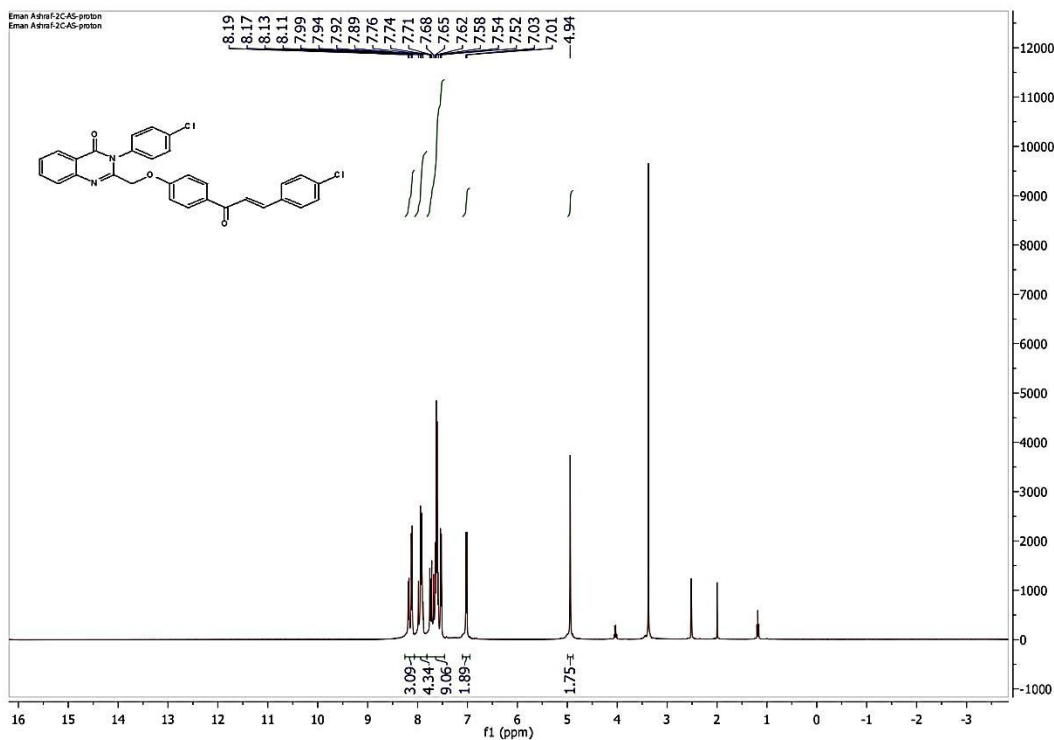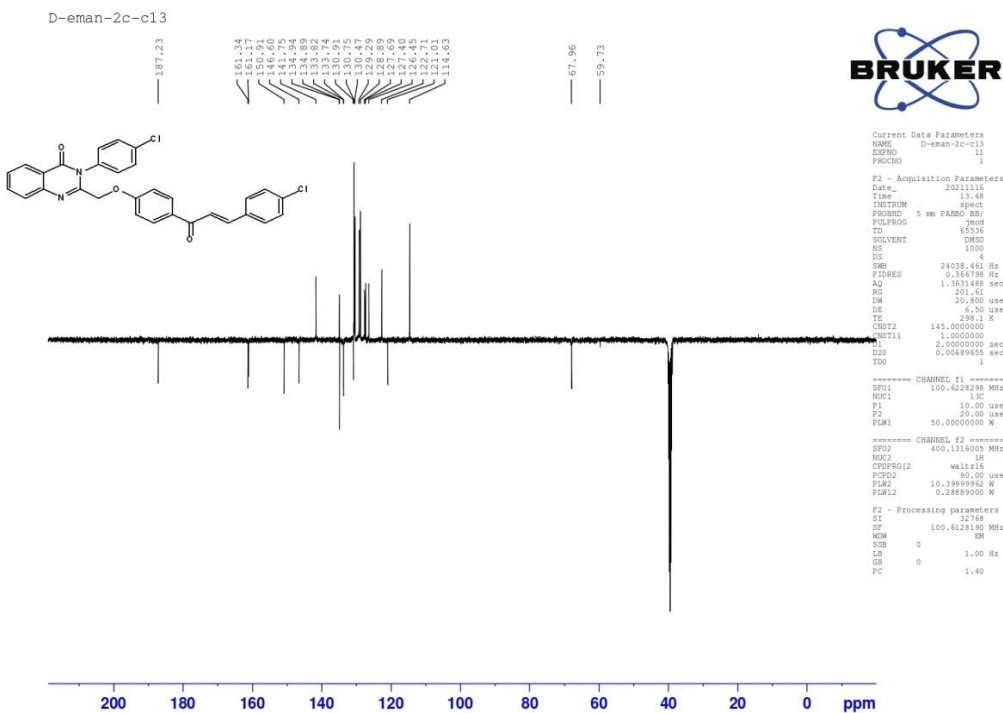

Current Data Parameters  
 NAME: D-eman-2c-cl13  
 EXPNO: 11  
 PROCNO: 1

F2 - Acquisition Parameters  
 Date\_: 20211116  
 Time: 13.48  
 INSTRUM: spect  
 PFGPROG: 5 mm PABBO 8H  
 FILPROG: mod  
 TD: 65536  
 SOLVENT: DMSO  
 NS: 1000  
 DS: 4  
 SMS: 24038.461 Hz  
 FIDRES: 0.164798 Hz  
 AQ: 1.3631488 sec  
 SFO: 201.461  
 DM: 20.800 usec  
 DE: 8.50 usec  
 TE: 298.1 K  
 CH21: 143.000000  
 CH211: 1.000000  
 D2O: 2.0000000 sec  
 D21: 0.0068955 sec  
 TDO: 1

==== CHANNEL f1 =====  
 SFO1 100.622896 MHz  
 NUQ1 1 LC  
 P1 18.00 usec  
 P2 20.00 usec  
 PLW1 50.0000000 W

==== CHANNEL f2 =====  
 SFO2 400.131800 MHz  
 NUQ2 1H  
 CPDPRG2 waltz16  
 PFGP2 90.00 usec  
 PLW2 10.3889962 W  
 PLW12 0.2888900 W

F2 - Processing parameters  
 SI 32768  
 SF 100.61228196 MHz  
 MDW 0 DM  
 SSB 0  
 LB 1.00 Hz  
 GB 0  
 PC 1.40

**Cairo University  
Micro Analytical Center**

**DI Analysis  
Shimadzu Qp-2010 Plus**

Sample Information  
 Analyzed by : Dr. Mai Younis  
 Analyzed : 21/01/2007 02:51:46  
 Sample Name : 2C  
 Sample ID :  
 Customer Name : Dr. Eman Ashraf - Pharmacy - Zagazik  
 Data File : C:\GCMSolution\Data\Project1\2C.QGD  
 Org Data File : C:\GCMSolution\Data\Project1\2C.QGD  
 Method File : C:\GCMSolution\Data\Project1\High Temperature Op  
 Org Method File : C:\GCMSolution\Data\Project1\High Temperature Op  
 Report File :  
 Tuning File : C:\GCMSolution\System\Tune1\\_default.qgt  
 \$End!\$ Modified by : Dr. Mai Younis  
 Modified : 21/01/2007 03:00:22

Method  
 Analytical Line 1  
 IonSourceTemp : 250.00 °C  
 [MS Table]  
 -Group 1 - Event 1-  
 Start Time : 0.00min  
 End Time : 10.00min  
 ACQ Mode : Scan  
 Event Time : 0.50sec  
 Scan Speed : 1250  
 Start m/z : 50.00  
 End m/z : 600.00  
 Electron Voltage : 70 eV  
 Ionization Mode : EI

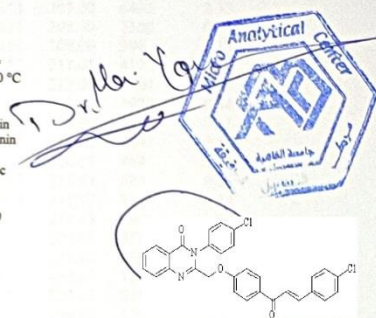

C:\GCMSolution\Data\Project1\2C.QGD

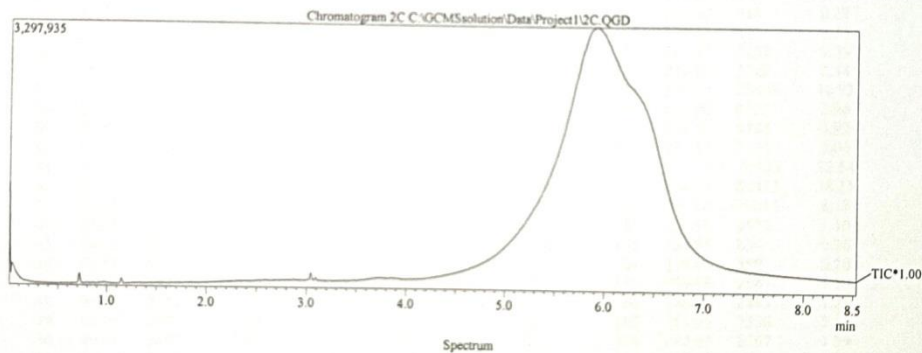

Line#:1 R.Time:5.9(Scan#:713)  
 MassPeaks:336  
 RawMode:Single 5.9(713) BasePeak:166(234482)  
 BG Mode:None Group 1 - Event 1

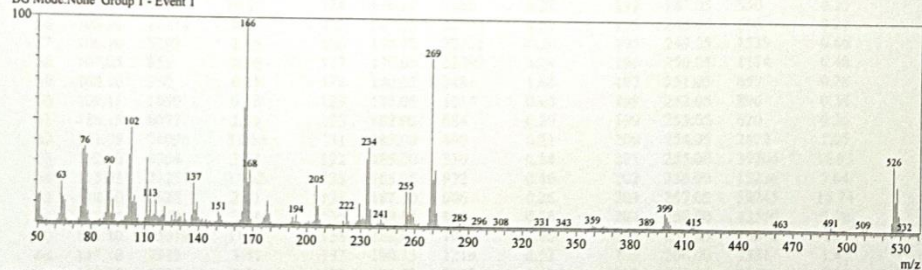

Mass Table  
 Line#:1 R.Time:5.9(Scan#:713)  
 MassPeaks:336  
 RawMode:Single 5.9(713) BasePeak:166(234482)  
 BG Mode:None Group 1 - Event 1

| # | m/z   | Abs. In | Rel. Int. | # | m/z   | Abs. In | Rel. Int. | # | m/z   | Abs. In | Rel. Int. |
|---|-------|---------|-----------|---|-------|---------|-----------|---|-------|---------|-----------|
| 1 | 50.00 | 31209   | 13.31     | 4 | 53.00 | 4252    | 1.81      | 7 | 56.10 | 706     | 0.30      |
| 2 | 51.00 | 32023   | 13.66     | 5 | 54.05 | 878     | 0.37      | 8 | 57.05 | 1317    | 0.56      |
| 3 | 52.00 | 6662    | 2.84      | 6 | 55.00 | 2596    | 1.11      | 9 | 58.15 | 428     | 0.18      |

**(E)-3-(4-Chlorophenyl)-2-((4-(3-(4-nitrophenyl)acryloyl)phenoxy)methyl)qui-nazolin-4(3H)-one (28).**

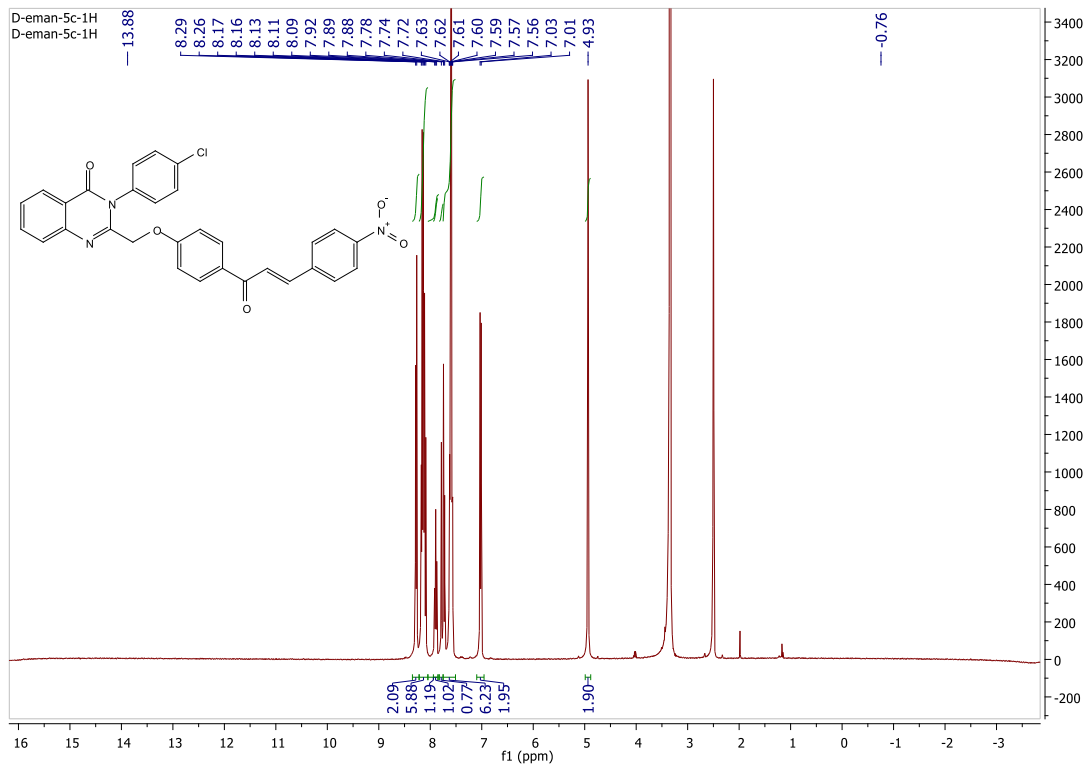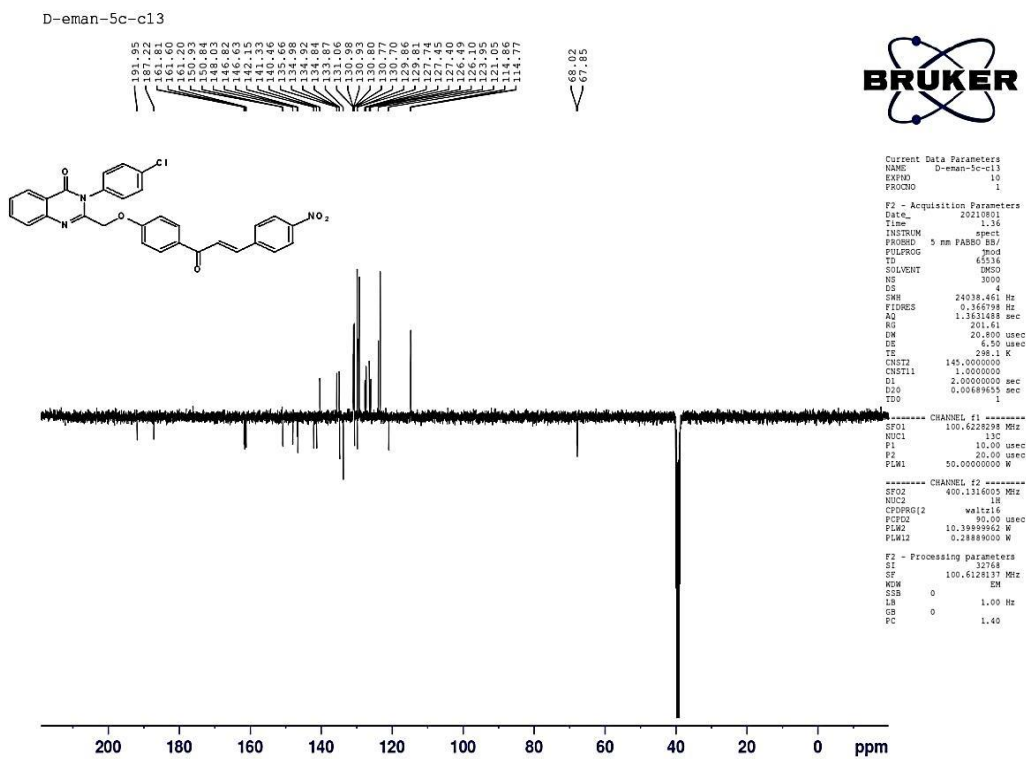



**Cairo University  
Micro Analytical Center**

**DI Analysis  
Shimadzu Qp-2010 Plus**

Sample Information  
 Analyzed by : Dr. Mai Younis  
 Analyzed : 21/01/2007 03:38:21  
 Sample Name : 5C  
 Sample ID :  
 Customer Name : Dr. Eman Ashraf - Pharmacy - Zagazik  
 Data File : C:\GCMSolution\Data\Project1\5C.QGD  
 Org Data File : C:\GCMSolution\Data\Project1\5C.QGD  
 Method File : C:\GCMSolution\Data\Project1\High Temperature Op  
 Org Method File : C:\GCMSolution\Data\Project1\High Temperature Op  
 Report File :  
 Tuning File : C:\GCMSolution\System1\Tune1\\_default.egt  
 \$End1\$ Modified by : Dr. Mai Younis  
 Modified : 21/01/2007 03:46:29

Method

Analytical Line 1  
 IonSourceTemp : 250.00 °C  
 [MS Table]  
 -Group 1 - Event 1-  
 Start Time : 0.00min  
 End Time : 10.00min  
 ACQ Mode : Scan  
 Event Time : 0.50sec  
 Scan Speed : 1250  
 Start m/z : 50.00  
 End m/z : 600.00  
 Electron Voltage : 70 eV  
 Ionization Mode : EI

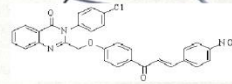

C:\GCMSolution\Data\Project1\5C.QGD

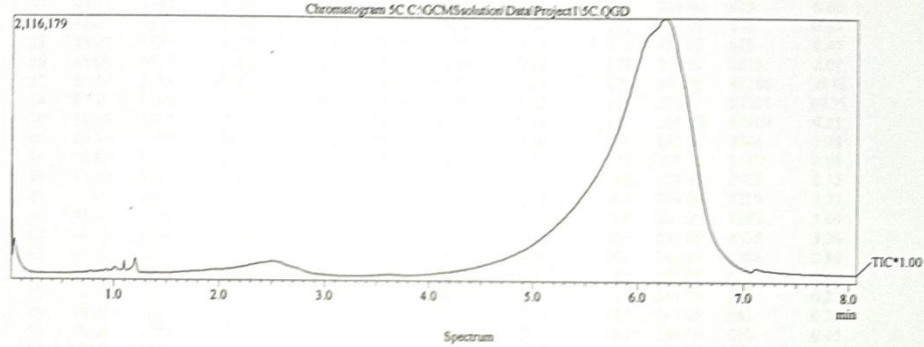

Line# 1 R.Time:6.3(Scan#:752)  
 MassPeaks:288  
 RawMode:Single 6.3(752) BasePeak:166(140206)  
 BG Mode:None Group 1 - Event 1

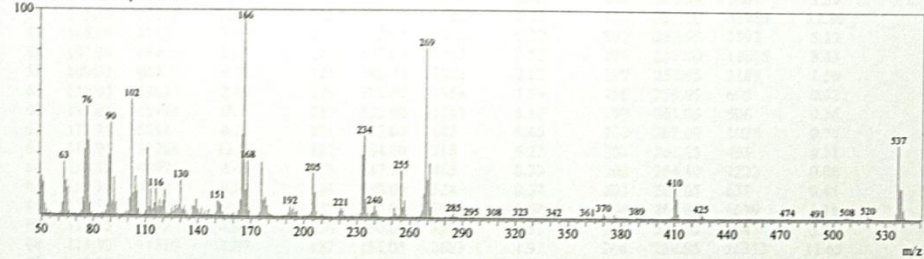

Mass Table  
 Line#:1 R.Time:6.3(Scan#:752)  
 MassPeaks:288  
 RawMode:Single 6.3(752) BasePeak:166(140206)  
 BG Mode:None Group 1 - Event 1

| # | m/z   | Abs. In | Rel. Int. | # | m/z   | Abs. In | Rel. Int. | # | m/z   | Abs. In | Rel. Int. |
|---|-------|---------|-----------|---|-------|---------|-----------|---|-------|---------|-----------|
| 1 | 50.00 | 26487   | 18.89     | 4 | 53.00 | 3479    | 2.48      | 7 | 56.05 | 608     | 0.43      |
| 2 | 51.00 | 22759   | 16.23     | 5 | 54.05 | 821     | 0.59      | 8 | 57.00 | 1023    | 0.73      |
| 3 | 52.05 | 7780    | 5.55      | 6 | 55.05 | 2161    | 1.54      | 9 | 58.00 | 340     | 0.24      |

**(E)-3-(4-Chlorophenyl)-2-((4-(3-(p-tolyl)acryloyl)phenoxy)methyl)quinazolin-4(3H)-one (29).**

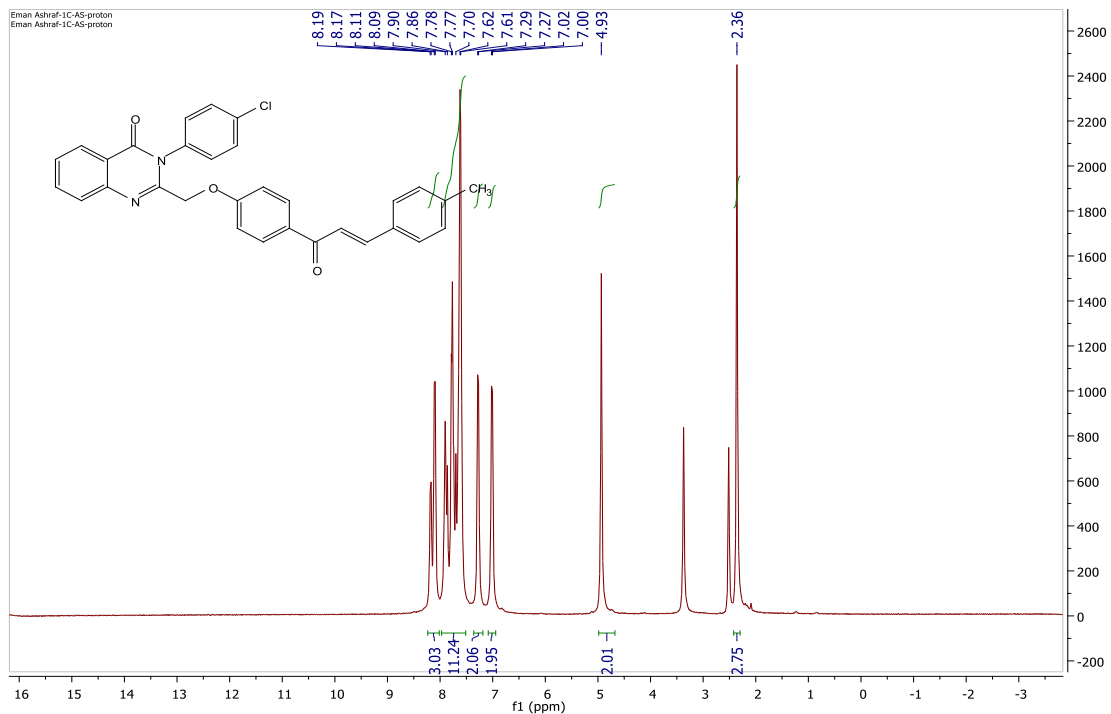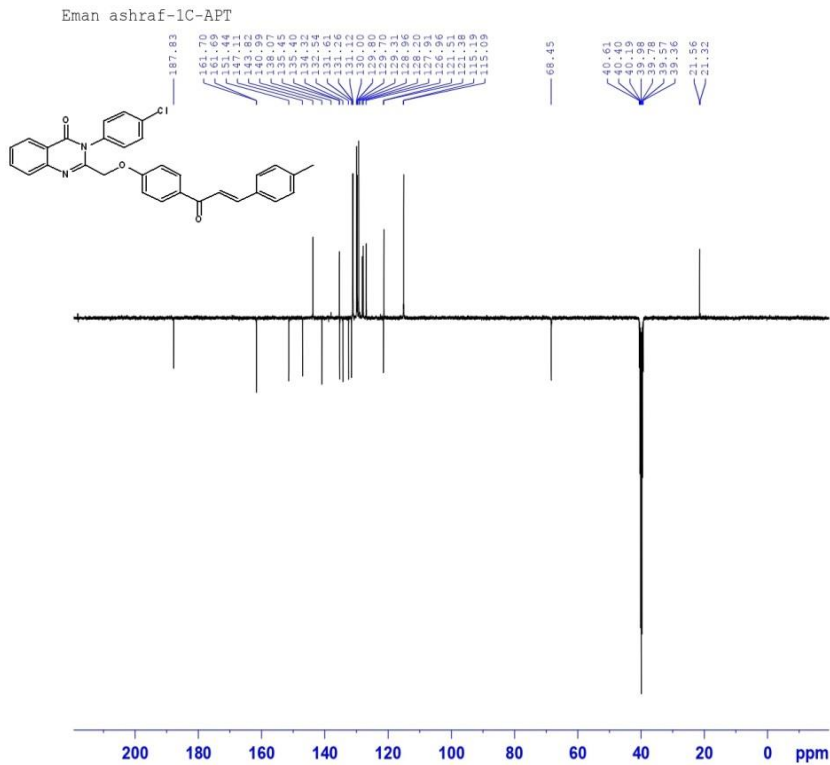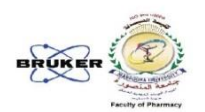

Current Data Parameters  
NAME Eman ashraf-1C-APT-DH  
EXPRNO 10  
PROCNO 2

F2 - Acquisition Parameters  
Date\_ 20210509  
Time 21.09 h  
INSTRUM spect  
PROBHD 5108618\_0945 f  
PULPROG \_gmod  
TD 65536  
SOLVENT DMSO  
NS 2200  
DS 4  
SWH 24038.461 Hz  
FIDRES 0.733596 Hz  
AQ 1.3621488 sec  
RG 197.77  
DN 20.800 usec  
DE 6.50 usec  
TE 297.1 K  
CNS12 145.0000000  
CNS11 1.0000000  
D1 2.00000000 sec  
D20 0.00689655 sec  
TDC 2  
SFO1 100.6404331 MHz  
NUC1 13C  
P1 10.00 usec  
P2 20.00 usec  
PLM1 47.0000000 W  
SFO2 400.2016008 MHz  
NUC2 1H  
CPDPRG2 waltz16  
PCPD2 90.00 usec  
PLM2 13.00000000 W  
PLM12 0.29249999 W

F2 - Processing parameters  
SI 32768  
SF 100.6303700 MHz  
WDW EM  
SBB 0  
LB 1.00 Hz  
GB 0  
PC 1.40

**Cairo University  
Micro Analytical Center**

**DI Analysis  
Shimadzu Qp-2010 Plus**

Sample Information  
 Analyzed by : Dr. Mai Younis  
 Analyzed : 21/01/2007 02:32:20  
 Sample Name : 1C  
 Sample ID :  
 Customer Name : Dr. Eman Ashraf - Pharmacy - Zagazik  
 Data File : C:\GCMSsolution\Data\Project1\1C.QGD  
 Org Data File : C:\GCMSsolution\Data\Project1\1C.QGD  
 Method File : C:\GCMSsolution\Data\Project1\High Temperature Op  
 Org Method File : C:\GCMSsolution\Data\Project1\High Temperature Op  
 Report File :  
 Tuning File : C:\GCMSsolution\System1\Tune1\\_default.qgt  
 \$End1\$Modified by : Dr. Mai Younis  
 Modified : 21/01/2007 02:40:52

Method  
 Analytical Line 1  
 IonSourceTemp : 250.00 °C  
 [MS Table]  
 -Group 1 - Event 1-  
 Start Time : 0.00min  
 End Time : 10.00min  
 ACQ Mode : Scan  
 Event Time : 0.50sec  
 Scan Speed : 1250  
 Start m/z : 50.00  
 End m/z : 600.00  
 Electron Voltage : 70 eV  
 Ionization Mode : EI

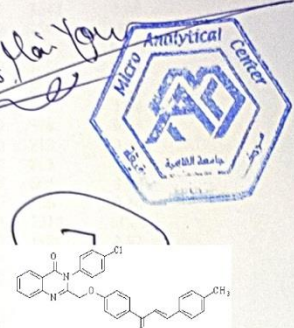

C:\GCMSsolution\Data\Project1\1C.QGD

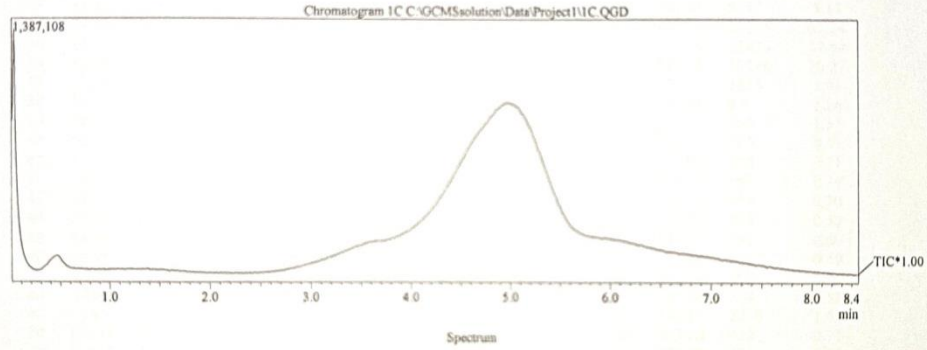

Line#:1 R.Time:5.1(Scan#:610)  
 MassPeaks:214  
 RawMode:Single 5.1(610) BasePeak:166(64825)  
 BG Mode:None Group 1 - Event 1

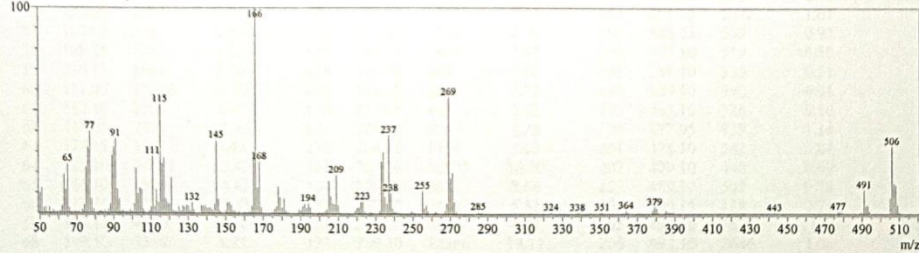

Mass Table  
 Line#:1 R.Time:5.1(Scan#:610)  
 MassPeaks:214  
 RawMode:Single 5.1(610) BasePeak:166(64825)  
 BG Mode:None Group 1 - Event 1

| # | m/z   | Abs. In | Rel. Int. | # | m/z   | Abs. In | Rel. Int. | # | m/z   | Abs. In | Rel. Int. |
|---|-------|---------|-----------|---|-------|---------|-----------|---|-------|---------|-----------|
| 1 | 50.00 | 6569    | 10.13     | 4 | 53.05 | 2065    | 3.19      | 7 | 56.10 | 351     | 0.54      |
| 2 | 51.00 | 8039    | 12.40     | 5 | 54.00 | 377     | 0.58      | 8 | 57.10 | 1100    | 1.70      |
| 3 | 52.05 | 1722    | 2.66      | 6 | 55.05 | 1942    | 3.00      | 9 | 58.10 | 375     | 0.58      |



**Cairo University  
Micro Analytical Center**

**DI Analysis  
Shimadzu Qp-2010 Plus**

Sample Information  
 Analyzed by : Dr. Mai Younis  
 Analyzed : 21/01/2007 03:21:41  
 Sample Name : 4C  
 Sample ID :  
 Customer Name : Dr.Eman Ashraf - Pharmacy - Zagazik  
 Data File : C:\GCMSsolution\Data\Project1\4C.QGD  
 Org Data File : C:\GCMSsolution\Data\Project1\4C.QGD  
 Method File : C:\GCMSsolution\Data\Project1\High Temperature Op  
 Org Method File : C:\GCMSsolution\Data\Project1\High Temperature Op  
 Report File :  
 Tuning File : C:\GCMSsolution\System\Tune1\\_default.qgt  
 \$EndIf\$Modified by : Dr. Mai Younis  
 Modified : 21/01/2007 03:29:18

Method  
 Analytical Line 1  
 IonSourceTemp : 250.00 °C  
 [MS Table]  
 -Group 1 - Event 1-  
 Start Time : 0.00min  
 End Time : 10.00min  
 ACQ Mode : Scan  
 Event Time : 0.50sec  
 Scan Speed : 1250  
 Start m/z : 50.00  
 End m/z : 600.00  
 Electron Voltage : 70 eV  
 Ionization Mode : EI

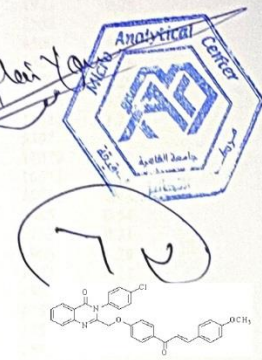

C:\GCMSsolution\Data\Project1\4C.QGD

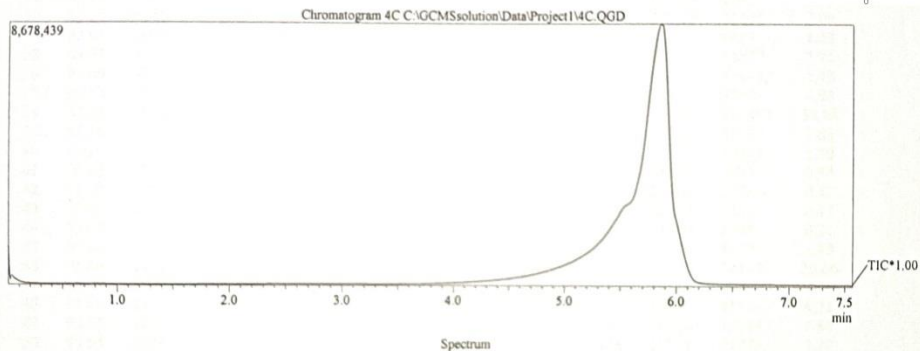

Line# 1 R.Time: 5.8(Scan#: 700)  
 MassPeaks: 419  
 RawMode: Single 5.8(700) BasePeak: 253(683733)  
 BG Mode: None Group 1 - Event 1

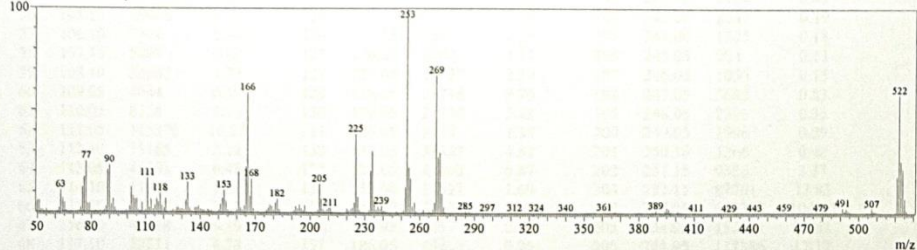

Mass Table  
 Line# 1 R.Time: 5.8(Scan#: 700)  
 MassPeaks: 419  
 RawMode: Single 5.8(700) BasePeak: 253(683733)  
 BG Mode: None Group 1 - Event 1

| # | m/z   | Abs. In | Rel. Int. | # | m/z   | Abs. In | Rel. Int. | # | m/z   | Abs. In | Rel. Int. |
|---|-------|---------|-----------|---|-------|---------|-----------|---|-------|---------|-----------|
| 1 | 50.00 | 39106   | 5.72      | 4 | 53.00 | 8422    | 1.23      | 7 | 56.00 | 1270    | 0.19      |
| 2 | 51.00 | 39983   | 5.85      | 5 | 54.05 | 1726    | 0.25      | 8 | 57.00 | 2228    | 0.33      |
| 3 | 52.05 | 8953    | 1.31      | 6 | 55.00 | 9764    | 1.43      | 9 | 58.05 | 673     | 0.10      |

**(E)-3-(4-Chlorophenyl)-2-((4-(3-(3,4-dimethoxyphenyl)acryloyl)phenoxy)methyl)quinazolin-4(3H)-one (31).**

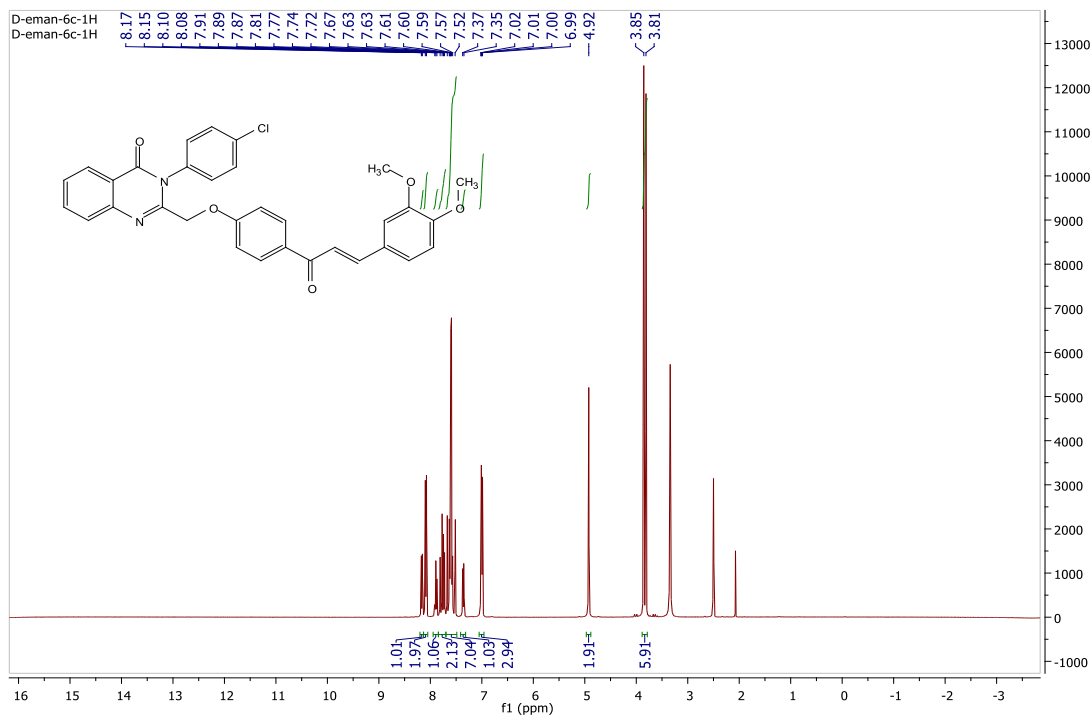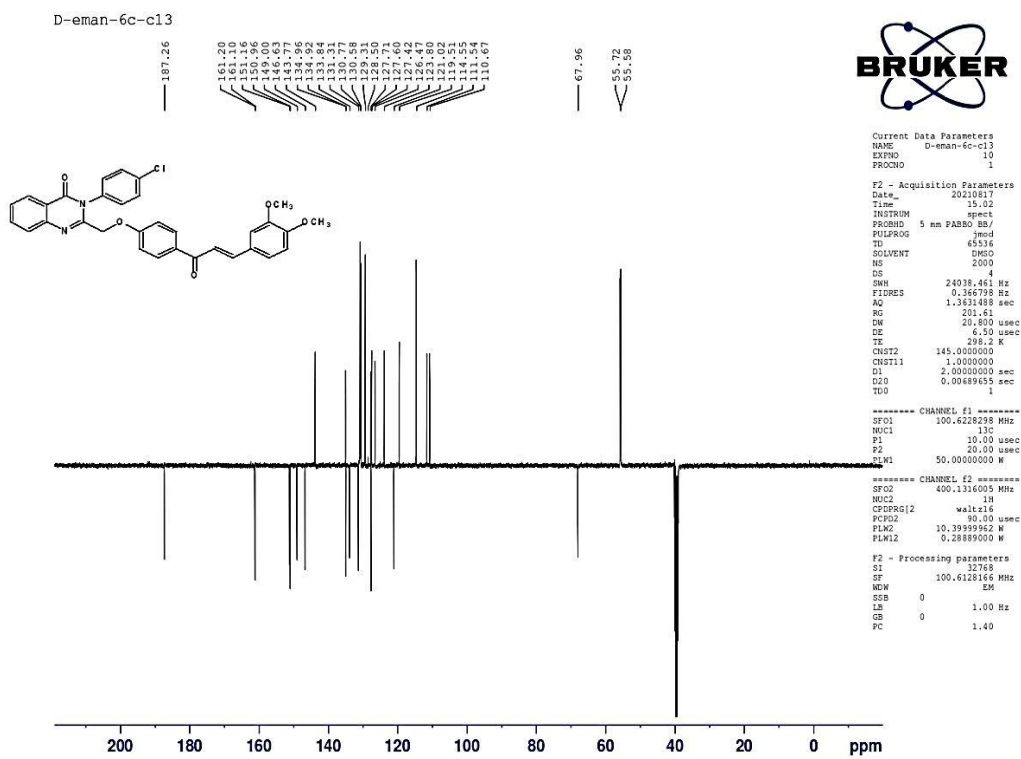

**Cairo University  
Micro Analytical Center**

**DI Analysis  
Shimadzu Qp-2010 Plus**

Sample Information  
 Analyzed by : Dr. Mai Younis  
 Analyzed : 21/01/2007 03:55:41  
 Sample Name : 6C  
 Sample ID :  
 Customer Name : Dr. Eman Ashraf - Pharmacy - Zagazik  
 Data File : C:\GCMSolution\Data\Project1\6C.QGD  
 Org Data File : C:\GCMSolution\Data\Project1\6C.QGD  
 Method File : C:\GCMSolution\Data\Project1\High Temperature Op  
 Org Method File : C:\GCMSolution\Data\Project1\High Temperature Op  
 Report File : C:\GCMSolution\System\Tune1\\_default.qgt  
 Tuning File : C:\GCMSolution\System\Tune1\\_default.qgt  
 \$EndIf\$Modified by : Dr. Mai Younis  
 Modified : 21/01/2007 04:03:26

Method  
 Analytical Line 1  
 IonSourceTemp : 250.00 °C  
 [MS Table]  
 -Group 1 - Event 1-  
 Start Time : 0.00min  
 End Time : 10.00min  
 ACQ Mode : Scan  
 Event Time : 0.50sec  
 Scan Speed : 1250  
 Start m/z : 50.00  
 End m/z : 600.00  
 Electron Voltage : 70 eV  
 Ionization Mode : EI

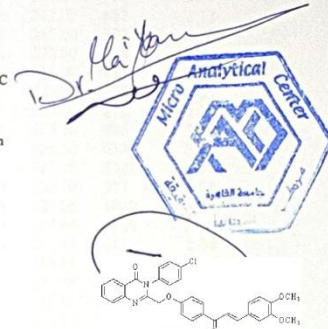

C:\GCMSolution\Data\Project1\6C.QGD

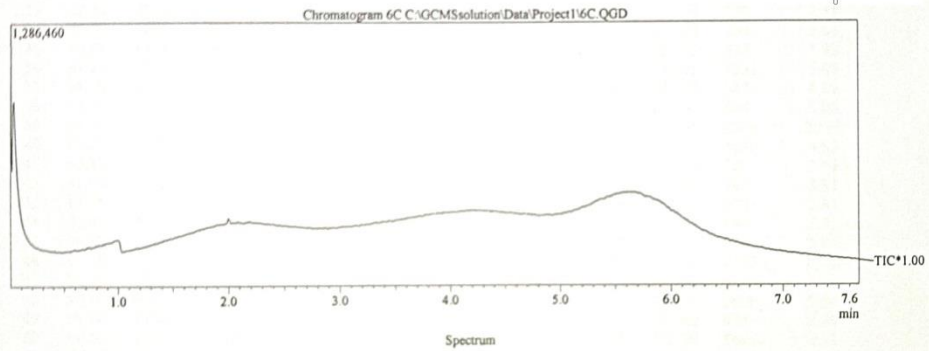

Line#:1 RTime:5.6(Scan#:675)  
 MassPeaks:202  
 RawMode:Single 5.6(675) BasePeak:57(21045)  
 BG Mode:None Group 1 - Event 1

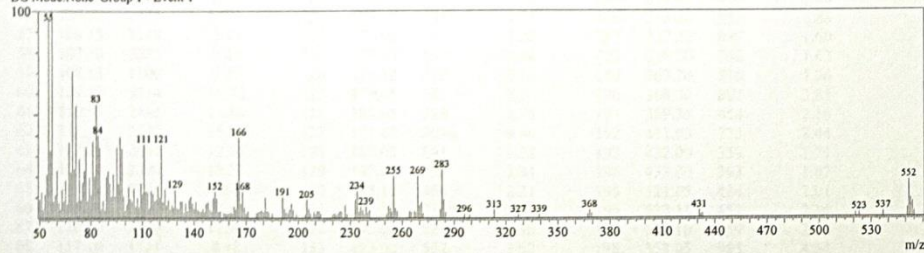

Mass Table  
 Line#:1 RTime:5.6(Scan#:675)  
 MassPeaks:202  
 RawMode:Single 5.6(675) BasePeak:57(21045)  
 BG Mode:None Group 1 - Event 1

| # | m/z   | Abs. In | Rel. Int. | # | m/z   | Abs. In | Rel. Int. | # | m/z   | Abs. In | Rel. Int. |
|---|-------|---------|-----------|---|-------|---------|-----------|---|-------|---------|-----------|
| 1 | 50.00 | 1879    | 8.93      | 4 | 53.05 | 2419    | 11.49     | 7 | 56.10 | 6863    | 32.61     |
| 2 | 51.00 | 2689    | 12.78     | 5 | 54.05 | 4439    | 21.09     | 8 | 57.05 | 21045   | 100.00    |
| 3 | 52.00 | 862     | 4.10      | 6 | 55.05 | 20436   | 97.11     | 9 | 58.05 | 1702    | 8.09      |

(E)-2-((4-Cinnamoylphenoxy)methyl)-3-(p-tolyl)quinazolin-4(3H)-one (32).

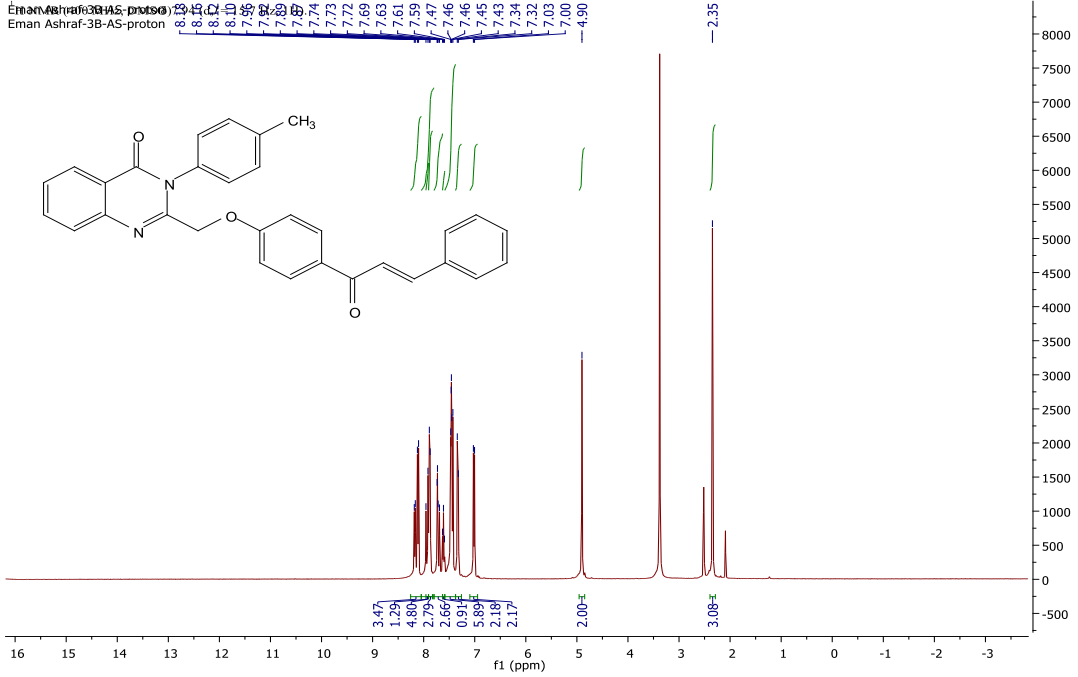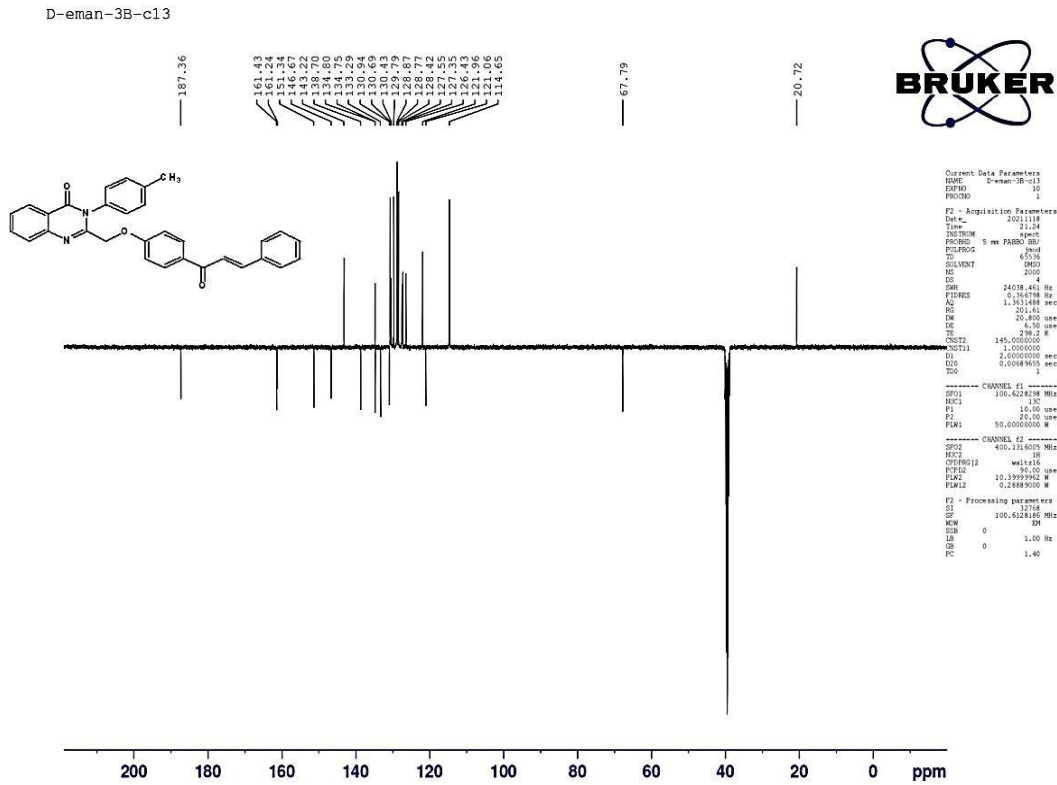



**Cairo University  
Micro Analytical Center**

**DI Analysis  
Shimadzu Qp-2010 Plus**

Sample Information  
 Analyzed by : Dr. Mai Younis  
 Analyzed : 21/01/2007 01:31:51  
 Sample Name : 3B  
 Sample ID :  
 Customer Name : Dr. Eman Ashraf - Pharmacy - Zagazik  
 Data File : C:\GCMSsolution\Data\Project1\3B.QGD  
 Orig. Data File : C:\GCMSsolution\Data\Project1\3B.QGD  
 Method File : C:\GCMSsolution\Data\Project1\High Temperature Op  
 Org. Method File : C:\GCMSsolution\Data\Project1\High Temperature Op  
 Report File :  
 Tuning File : C:\GCMSsolution\System1\Tune1\_default.qgt  
 \$EndIf\$Modified by : Dr. Mai Younis  
 Modified : 21/01/2007 01:38:57

Method  
 Analytical Line 1  
 IonSourceTemp : 250.00 °C  
 [MS Table]  
 --Group 1 - Event 1--  
 Start Time : 0:00min  
 End Time : 10:00min  
 ACQ Mode : Scan  
 Event Time : 0:50sec  
 Scan Speed : 1250  
 Start m/z : 50.00  
 End m/z : 600.00  
 Electron Voltage : 70 eV  
 Ionization Mode : EI

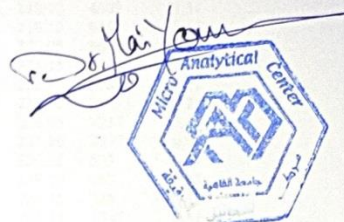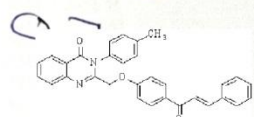

C:\GCMSsolution\Data\Project1\3B.QGD

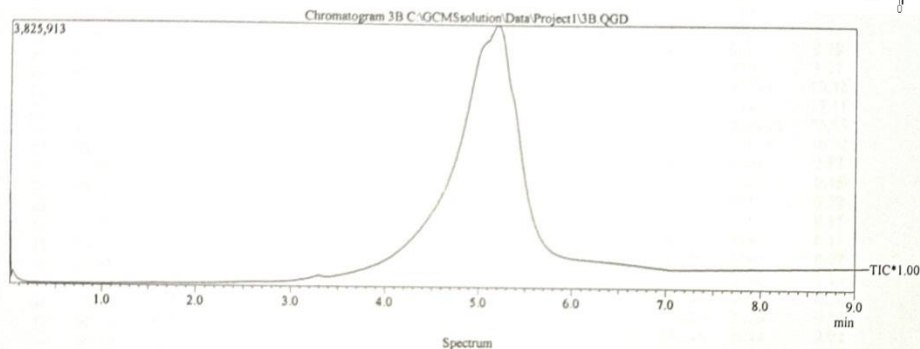

Line#: 1 R. Time: 5.2(Scan#: 626)  
 MassPeaks: 279  
 RawMode: Single 5.2(626) BasePeak: 146(299257)  
 BG Mode: None Group 1 - Event 1

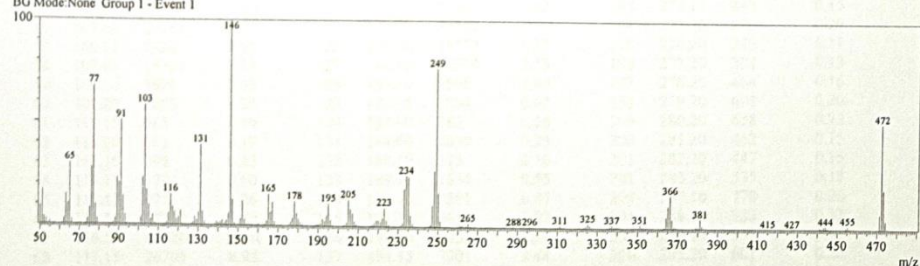

Mass Table  
 Line#: 1 R. Time: 5.2(Scan#: 626)  
 MassPeaks: 279  
 RawMode: Single 5.2(626) BasePeak: 146(299257)  
 BG Mode: None Group 1 - Event 1

| # | m/z   | Abs. In | Rel. Int. | # | m/z   | Abs. In | Rel. Int. | # | m/z   | Abs. In | Rel. Int. |
|---|-------|---------|-----------|---|-------|---------|-----------|---|-------|---------|-----------|
| 1 | 50.05 | 26963   | 9.01      | 4 | 53.05 | 8608    | 2.88      | 7 | 56.05 | 916     | 0.31      |
| 2 | 51.05 | 51134   | 17.09     | 5 | 54.05 | 1472    | 0.49      | 8 | 57.10 | 1906    | 0.64      |
| 3 | 52.05 | 11959   | 4.00      | 6 | 55.05 | 5146    | 1.72      | 9 | 58.05 | 395     | 0.13      |

**(E)-2-((4-(3-(4-Chlorophenyl)acryloyl)phenoxy)methyl)-3-(p-tolyl)quinazolin-4(3H)-one (33).**

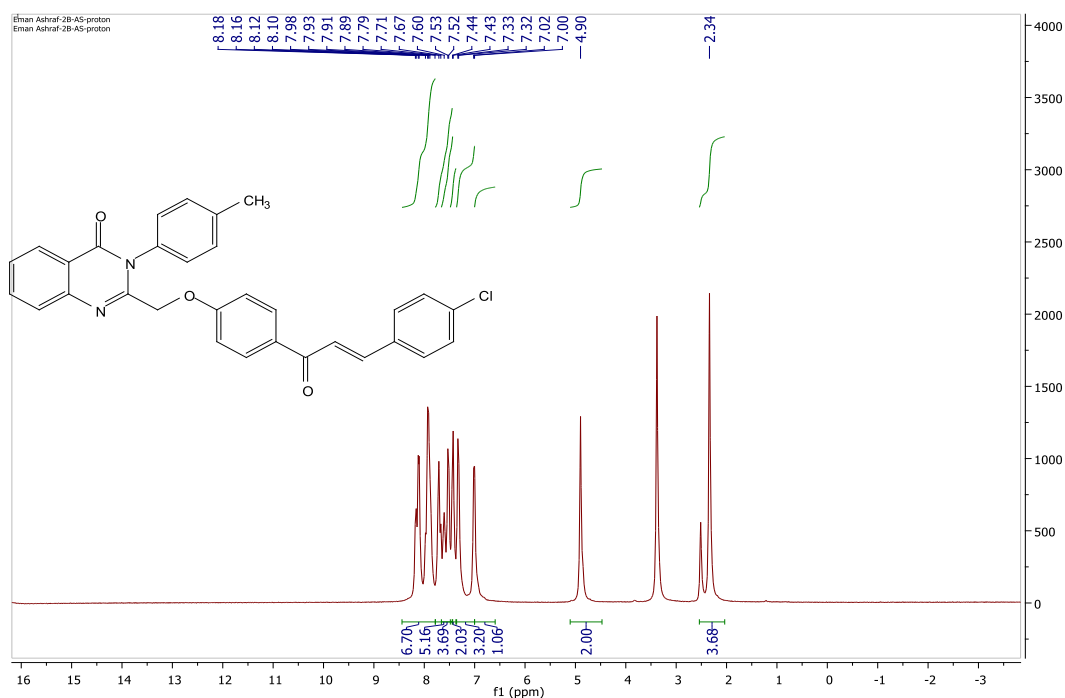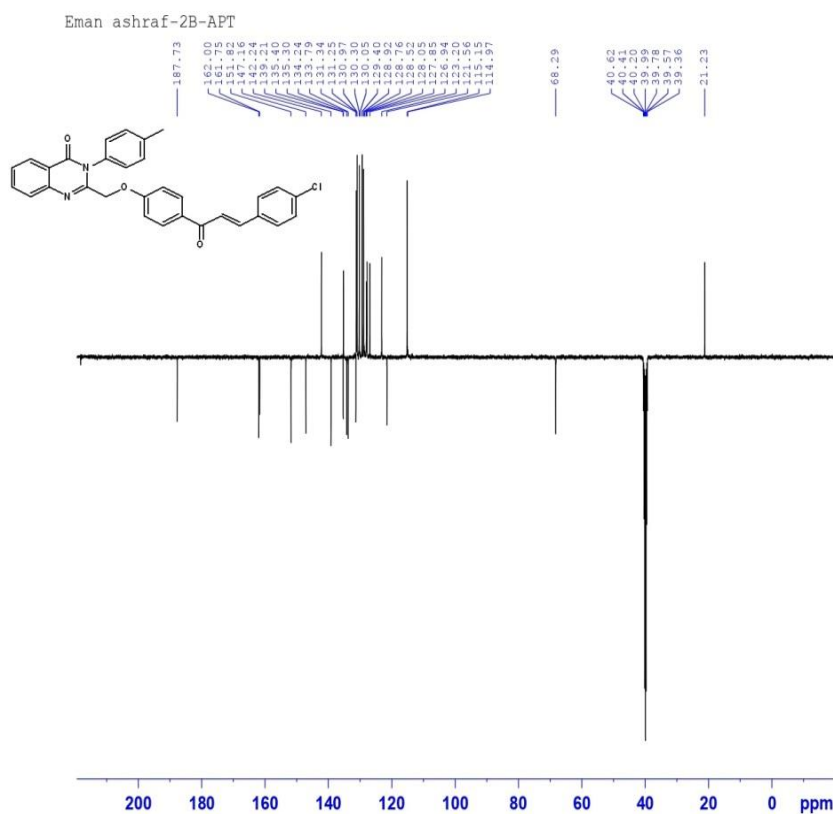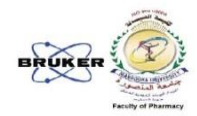

Current Data Parameters  
 NAME Eman ashraf-2B-APT-OW  
 EXPNO 10  
 PROCNO 1

F2 - Acquisition Parameters  
 Date\_ 20210509  
 Time 19.00 h  
 INSTRUM spect  
 PROCNO 2108618 0945 ( )  
 PULPROG \_zmod  
 TD 65536  
 SOLVENT DMSO  
 NS 2200  
 DS 4  
 SWH 24038.461 Hz  
 FIDRES 0.733596 Hz  
 AQ 1.3631488 sec  
 RG 197.77  
 DW 20.800 usec  
 DE 6.50 usec  
 TE 297.1 K  
 CNU2 145.000000  
 CNST11 1.000000  
 D1 2.0000000 sec  
 D20 0.00689655 sec  
 TD0 1  
 SFO1 100.6404331 MHz  
 NU01 130  
 P1 10.00 usec  
 P2 20.00 usec  
 PLM1 47.0000000 W  
 SFO2 400.2016008 MHz  
 NU02 13  
 CPDPRG2 waltz16  
 PCPD 90.00 usec  
 PLM2 13.0000000 W  
 PLM12 0.29249999 W

F2 - Processing parameters  
 SI 32768  
 SF 100.6303700 MHz  
 SSW 8M  
 SSB 0  
 LB 1.00 Hz  
 GB 0  
 FC 1.40

## Cairo University Micro Analytical Center

### DI Analysis Shimadzu Qp-2010 Plus

Sample Information  
 Analyzed by : Dr. Mai Younis  
 Analyzed : 21/01/2007 01:18:19  
 Sample Name : 2B  
 Sample ID :  
 Customer Name : Dr. Eman Ashraf - Pharmacy - Zagazik  
 Data File : C:\GCMSolution\Data\Project1\2B.QGD  
 Orig. Data File : C:\GCMSolution\Data\Project1\2B.QGD  
 Method File : C:\GCMSolution\Data\Project1\High Temperature Op  
 Org. Method File : C:\GCMSolution\Data\Project1\High Temperature Op  
 Report File :  
 Tuning File : C:\GCMSolution\System\Tune1\\_default.qgt  
 \$EndIf\$Modified by : Dr. Mai Younis  
 Modified : 21/01/2007 01:25:36

## Method

Analytical Line 1  
 IonSourceTemp : 250.00 °C  
 [MS Table]  
 -Group 1 - Event 1-  
 Start Time : 0.00min  
 End Time : 10.00min  
 ACQ Mode : Scan  
 Event Time : 0.50sec  
 Scan Speed : 1250  
 Start m/z : 50.00  
 End m/z : 600.00

Electron Voltage : 70 eV  
 Ionization Mode : EI

C:\GCMSolution\Data\Project1\2B.QGD

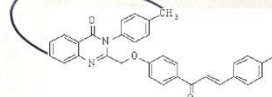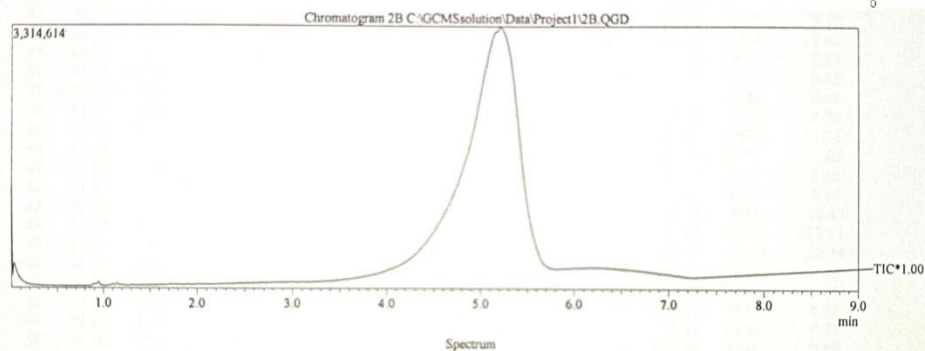

Line#: 1 R. Time: 5.2(Scan#: 622)  
 MassPeaks: 318  
 RawMode: Single 5.2(622) BasePeak: 146(303353)  
 BG Mode: None Group 1 - Event 1

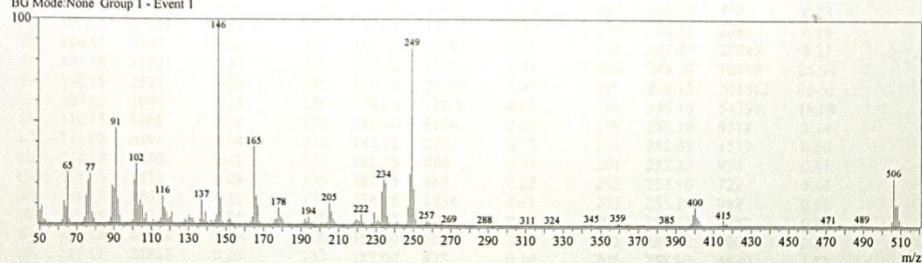

## Mass Table

Line#: 1 R. Time: 5.2(Scan#: 622)

MassPeaks: 318

RawMode: Single 5.2(622) BasePeak: 146(303353)

BG Mode: None Group 1 - Event 1

| # | m/z   | Abs. In | Rel. Int. | # | m/z   | Abs. In | Rel. Int. | # | m/z   | Abs. In | Rel. Int. |
|---|-------|---------|-----------|---|-------|---------|-----------|---|-------|---------|-----------|
| 1 | 50.00 | 20220   | 6.67      | 4 | 53.05 | 5500    | 1.81      | 7 | 56.10 | 799     | 0.26      |
| 2 | 51.00 | 27562   | 9.09      | 5 | 54.10 | 1177    | 0.39      | 8 | 57.05 | 1611    | 0.53      |
| 3 | 52.05 | 7366    | 2.43      | 6 | 55.05 | 2701    | 0.89      | 9 | 58.05 | 346     | 0.11      |

**(E)-2-((4-(3-(4-Nitrophenyl)acryloyl)phenoxy)methyl)-3-(p-tolyl)quinazolin-4(3H)-one (34).**

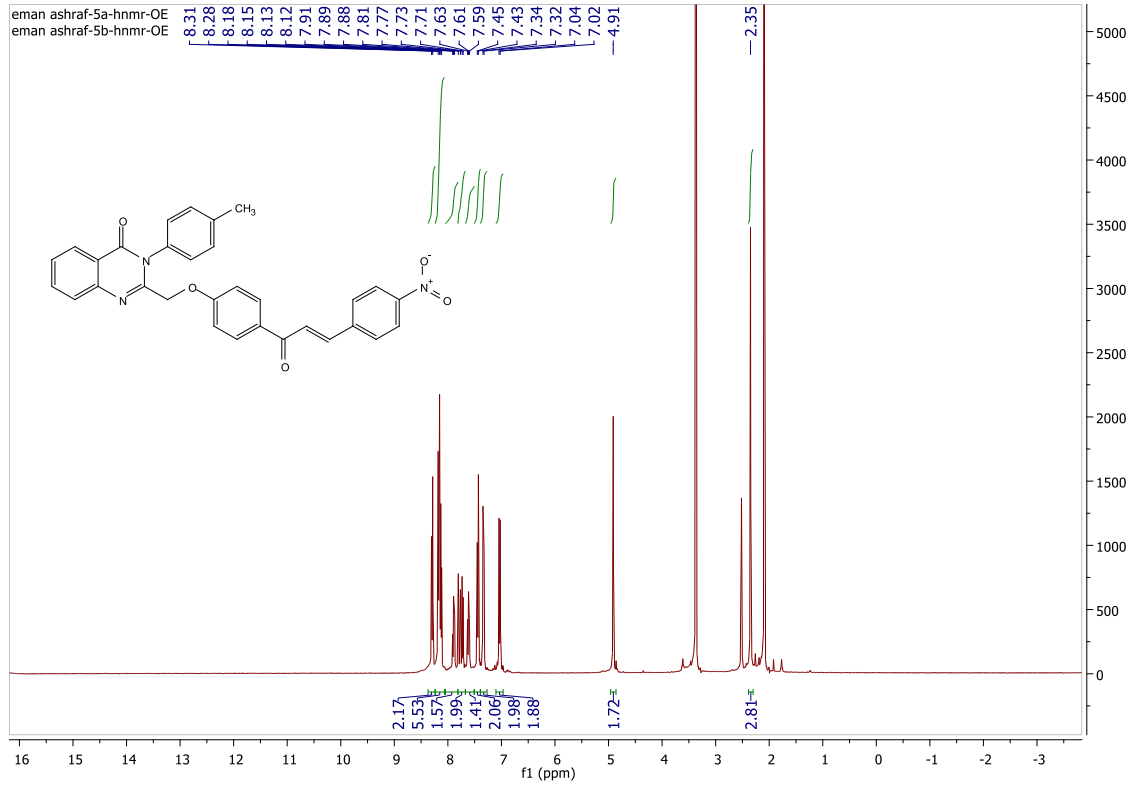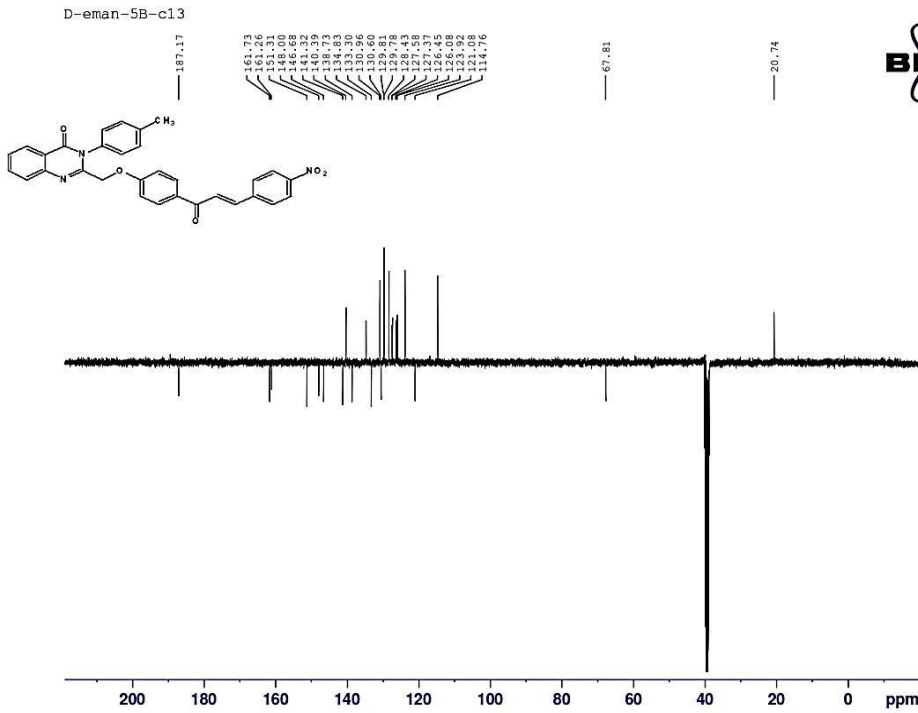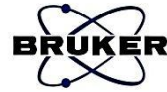

```

===== CHANNEL f2 =====
F2 - Acquisition Parameters
Date_   03/11/16
Time    15:45
F2NAME  5-man 18000 80
PROBHD  5 mm 1H/13
PULPROG zgpg30
SOLVENT  CDCl3
NS      1000
DS      4
SWH     24000.000 Hz
FIDRES  0.100000 Hz
AQ      0.100000 sec
RG      655.36
AQ1     0.100000 sec
RG1     655.36
SFO1    100.6261268 MHz
SFO2    125.7613600 MHz
===== CHANNEL f1 =====
F1 - Acquisition Parameters
Date_   03/11/16
Time    15:45
F1NAME  5-man 18000 80
PROBHD  5 mm 1H/13
PULPROG zgpg30
SOLVENT  CDCl3
NS      1000
DS      4
SWH     24000.000 Hz
FIDRES  0.100000 Hz
AQ      0.100000 sec
RG      655.36
AQ1     0.100000 sec
RG1     655.36
SFO1    100.6261268 MHz
SFO2    125.7613600 MHz
===== CHANNEL f3 =====
F3 - Processing parameters
SI      32768
SF      100.6261268 MHz
WDW     EM
SSB     0
GB      0
PC      1.60
    
```

**Cairo University  
Micro Analytical Center**

**DI Analysis  
Shimadzu Qp-2010 Plus**

Sample Information  
 Analyzed by : Dr. Mai Younis  
 Analyzed : 21/01/2007 02:02:13  
 Sample Name : 5B  
 Sample ID :  
 Customer Name : Dr. Eman Ashraf - Pharmacy - Zagazik  
 Data File : C:\GCMSolution\Data\Project1\5B.QGD  
 Org Data File : C:\GCMSolution\Data\Project1\5B.QGD  
 Method File : C:\GCMSolution\Data\Project1\High Temperature Op  
 Org Method File : C:\GCMSolution\Data\Project1\High Temperature Op  
 Report File :  
 Tuning File : C:\GCMSolution\System1\Tune1\\_default.qgt  
 \$EndIf\$ Modified by : Dr. Mai Younis  
 Modified : 21/01/2007 02:10:43

Method  
 Analytical Line 1  
 IonSourceTemp : 250.00 °C  
 [MS Table]  
 --Group 1 - Event 1--  
 Start Time : 0.00min  
 End Time : 10.00min  
 ACQ Mode : Scan  
 Event Time : 0.50sec  
 Scan Speed : 1250  
 Start m/z : 50.00  
 End m/z : 600.00  
 Electron Voltage : 70 eV  
 Ionization Mode : EI

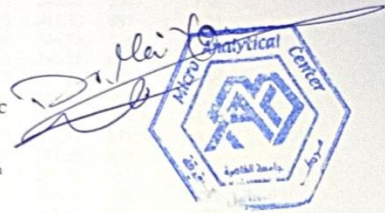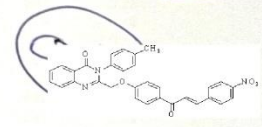

C:\GCMSolution\Data\Project1\5B.QGD

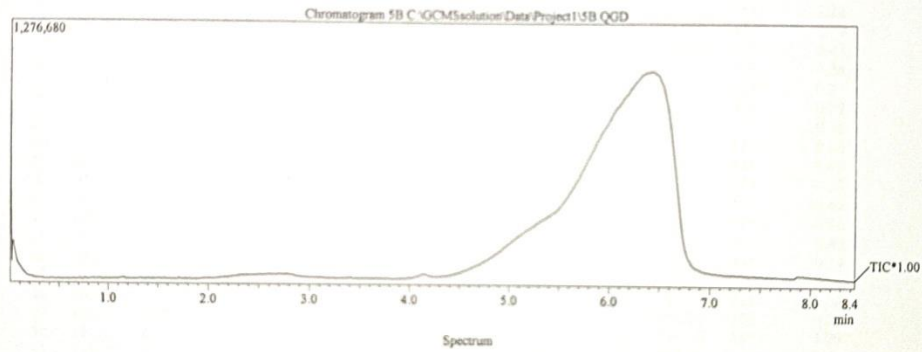

Line#:1 R.Time:6.5(Scan#:777)  
 MassPeaks:199  
 RawMode:Single 6.5(777) BasePeak:146(120556)  
 BG Mode:None Group 1 - Event 1

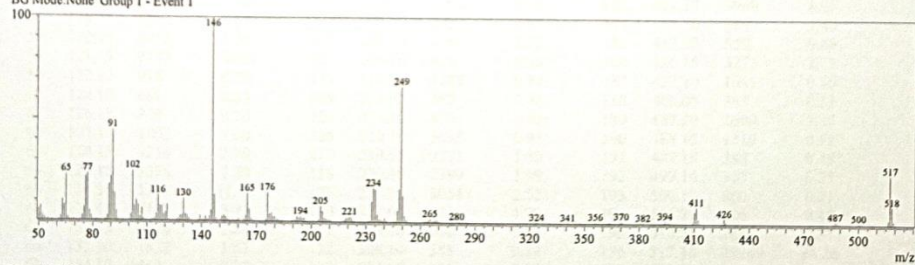

Mass Table  
 Line#:1 R.Time:6.5(Scan#:777)  
 MassPeaks:199  
 RawMode:Single 6.5(777) BasePeak:146(120556)  
 BG Mode:None Group 1 - Event 1

| # | m/z   | Abs. In | Rel. Int. | # | m/z   | Abs. In | Rel. Int. | # | m/z   | Abs. In | Rel. Int. |
|---|-------|---------|-----------|---|-------|---------|-----------|---|-------|---------|-----------|
| 1 | 50.00 | 7015    | 5.82      | 4 | 53.05 | 2162    | 1.79      | 7 | 57.05 | 595     | 0.49      |
| 2 | 51.00 | 8663    | 7.19      | 5 | 54.05 | 534     | 0.44      | 8 | 61.15 | 395     | 0.33      |
| 3 | 52.05 | 3510    | 2.91      | 6 | 55.00 | 1039    | 0.86      | 9 | 62.15 | 2519    | 2.09      |



**Cairo University  
Micro Analytical Center**

**DI Analysis  
Shimadzu Qp-2010 Plus**

Sample Information  
 Analyzed by : Dr. Mai Younis  
 Analyzed : 21/01/2007 01:06:30  
 Sample Name : 1B  
 Sample ID :  
 Customer Name : Dr. Eman Aslraf - Pharmacy - Zagazik  
 Data File : C:\GCMSolution\Data\Project1\1B.QGD  
 Org Data File : C:\GCMSolution\Data\Project1\1B.QGD  
 Method File : C:\GCMSolution\Data\Project1\High Temperature Op  
 Org Method File : C:\GCMSolution\Data\Project1\High Temperature Op  
 Report File :  
 Tuning File : C:\GCMSolution\System\Tune1\\_default.qgt  
 \$Endl\$Modified by : Dr. Mai Younis  
 Modified : 21/01/2007 01:11:16

Method

Analytical Line 1  
 IonSourceTemp : 250.00 °C  
 [MS Table]  
 -Group 1 - Event 1-  
 Start Time : :0.00min  
 End Time : :10.00min  
 ACQ Mode : :Scan  
 Event Time : :0.50sec  
 Scan Speed : :1250  
 Start m/z : :50.00  
 End m/z : :600.00

Electron Voltage : 70 eV  
 Ionization Mode : EI

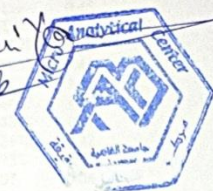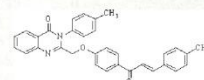

C:\GCMSolution\Data\Project1\1B.QGD

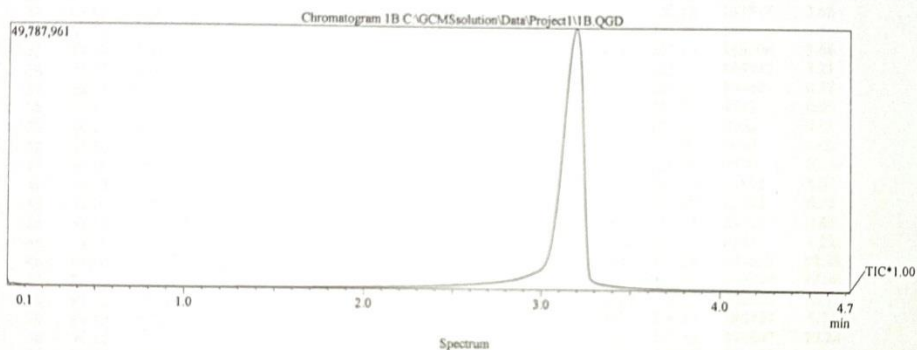

Line#:1 R.Time:3.2(Scan#:384)  
 MassPeaks:441  
 RawMode:Single 3.2(384) BasePeak:249(5139186)  
 BG Mode:None Group 1 - Event 1

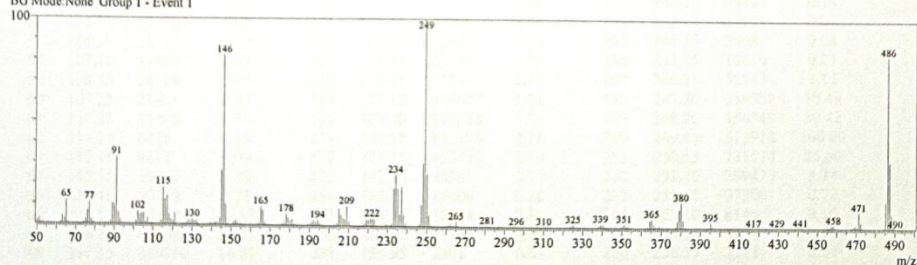

Mass Table  
 Line#:1 R.Time:3.2(Scan#:384)  
 MassPeaks:441  
 RawMode:Single 3.2(384) BasePeak:249(5139186)  
 BG Mode:None Group 1 - Event 1

| # | m/z   | Abs. In | Rel. Int. | # | m/z   | Abs. In | Rel. Int. | # | m/z   | Abs. In | Rel. Int. |
|---|-------|---------|-----------|---|-------|---------|-----------|---|-------|---------|-----------|
| 1 | 50.05 | 99629   | 1.94      | 4 | 53.05 | 44022   | 0.86      | 7 | 56.10 | 5001    | 0.10      |
| 2 | 51.05 | 151574  | 2.95      | 5 | 54.05 | 7639    | 0.15      | 8 | 57.10 | 11057   | 0.22      |
| 3 | 52.05 | 43799   | 0.85      | 6 | 55.05 | 29070   | 0.57      | 9 | 58.05 | 2922    | 0.06      |

**(E)-2-((4-(3-(4-Methoxyphenyl)acryloyl)phenoxy)methyl)-3-(p-tolyl)quinazolin-4(3H)-one (36).**

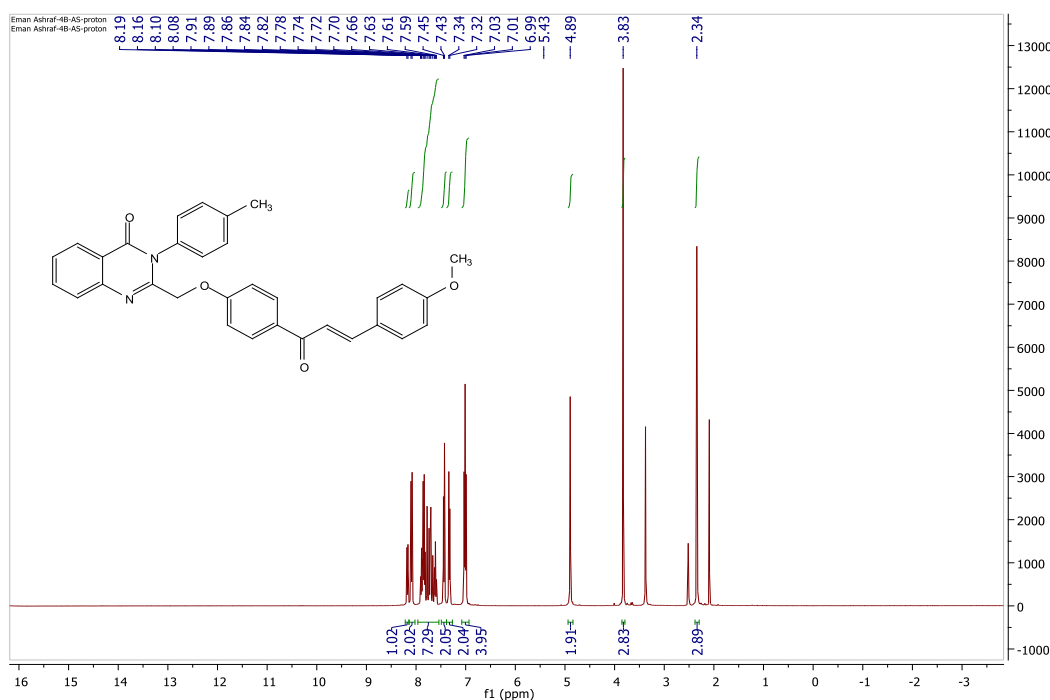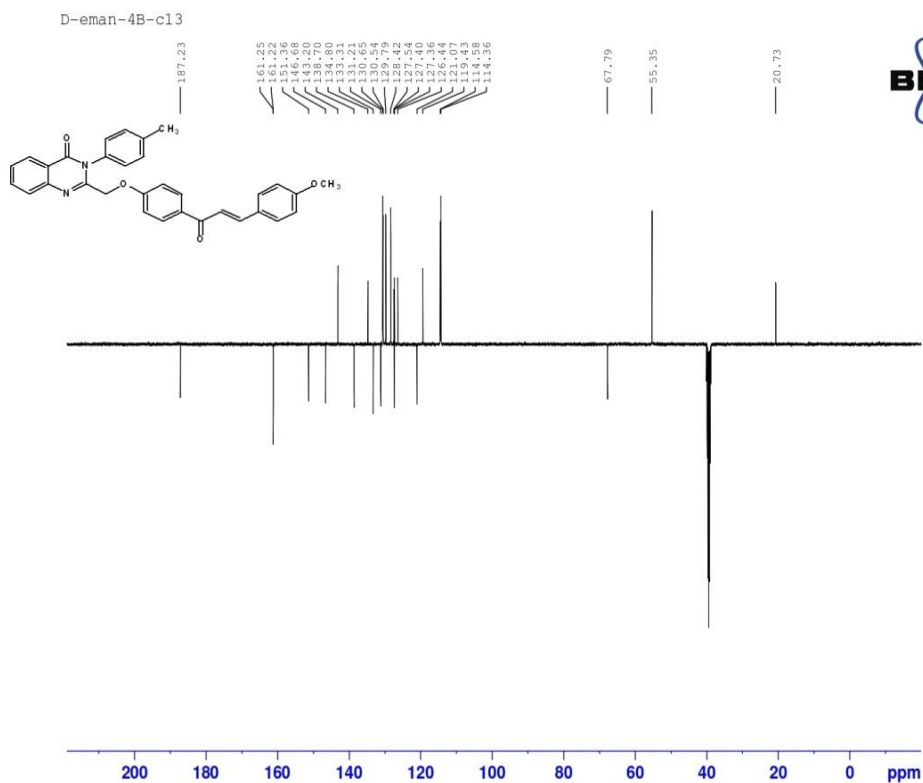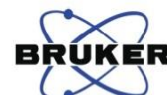

Current Data Parameters  
 NAME: D-eman-4B-c13  
 EXPNO: 12  
 PROCNO: 1  
 F2 - Acquisition Parameters  
 Date\_: 2021117  
 Time: 14:46  
 INSTRUM: spect  
 PROCNO: 1  
 PULPROG: zgpg30  
 TD: 65536  
 SOLVENT: DMSO  
 NS: 2000  
 DS: 4  
 SWH: 24038.441 Hz  
 FIDRES: 0.264788 Hz  
 AQ: 1.3631488 sec  
 RG: 201.40  
 DQ: 20.480 usec  
 DE: 6.20 usec  
 TE: 298.15 K  
 CHST2: 145.000000  
 CHFT11: 1.000000  
 CHFT12: 2.00000000 sec  
 DQ0: 0.00489600 sec  
 TD0: 1  
 ----- CHANNEL f1 -----  
 SFO1: 100.628268 MHz  
 NUC1: 13C  
 P1: 10.00 usec  
 PL1: 0.00 usec  
 PLW1: 50.0000000 W  
 ----- CHANNEL f2 -----  
 SFO2: 400.141600 MHz  
 NUC2: 1H  
 P2: 10.00 usec  
 PL2: 0.00 usec  
 PLW2: 50.0000000 W  
 F2 - Processing parameters  
 SI: 32768  
 SF: 100.613180 MHz  
 WDW: DM  
 SSB: 0  
 LB: 1.00 Hz  
 GB: 0  
 PC: 1.40



**Cairo University  
Micro Analytical Center**

**DI Analysis  
Shimadzu Qp-2010 Plus**

Sample Information  
 Analyzed by : Dr. Mai Younis  
 Analyzed : 21/01/2007 01:46:31  
 Sample Name : 4B  
 Sample ID :  
 Customer Name : Dr Eman Ashraf - Pharmacy - Zagazik  
 Data File : C:\GCMSsolution\Data\Project1\4B.QGD  
 Org Data File : C:\GCMSsolution\Data\Project1\4B.QGD  
 Method File : C:\GCMSsolution\Data\Project1\High Temperature Op  
 Org Method File : C:\GCMSsolution\Data\Project1\High Temperature Op  
 Report File :  
 Tuning File : C:\GCMSsolution\System\Tune1\\_default.qgt  
 \$EndIf\$Modified by : Dr. Mai Younis  
 Modified : 21/01/2007 01:55:15

Method  
 Analytical Line 1  
 IonSourceTemp :250.00 °C  
 [MS Table]  
 -Group 1 - Event 1--  
 Start Time :0.00min  
 End Time :10.00min  
 ACQ Mode :Scan  
 Event Time :0.50sec  
 Scan Speed :1250  
 Start m/z :50.00  
 End m/z :600.00  
 Electron Voltage : 70 eV  
 Ionization Mode : EI

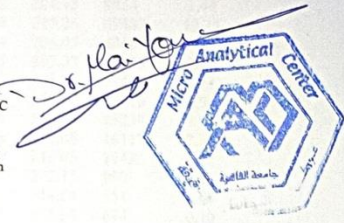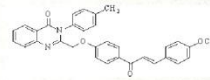

C:\GCMSsolution\Data\Project1\4B.QGD

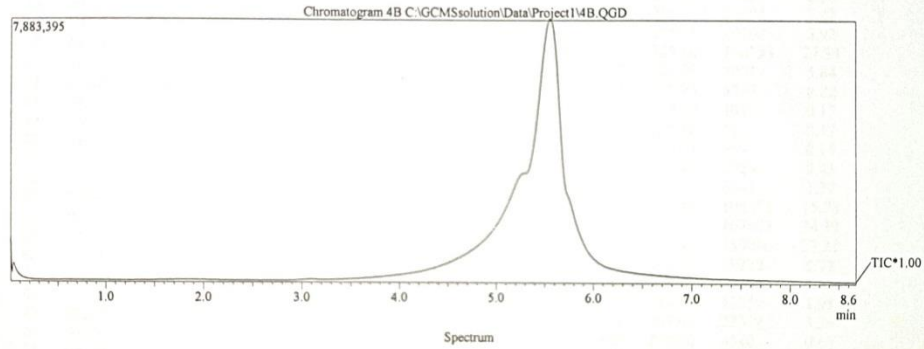

Line#:1 R.Time:5.5(Scan#:665)  
 MassPeaks:363  
 RawMode:Single 5.5(665) BasePeak:249(685198)  
 BG Mode:None Group 1 - Event 1

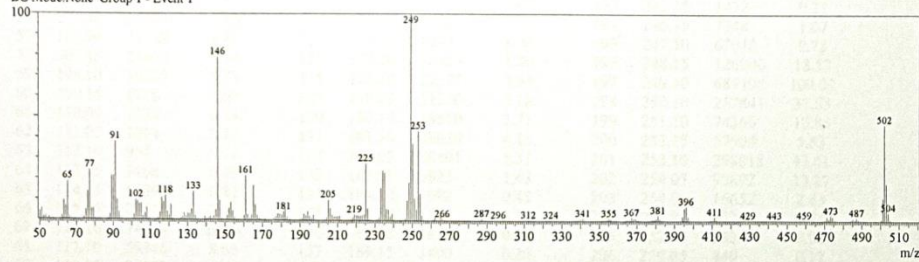

Mass Table  
 Line#:1 R.Time:5.5(Scan#:665)  
 MassPeaks:363  
 RawMode:Single 5.5(665) BasePeak:249(685198)  
 BG Mode:None Group 1 - Event 1

| # | m/z   | Abs. In | Rel. Int. | # | m/z   | Abs. In | Rel. Int. | # | m/z   | Abs. In | Rel. Int. |
|---|-------|---------|-----------|---|-------|---------|-----------|---|-------|---------|-----------|
| 1 | 50.05 | 27503   | 4.01      | 4 | 53.05 | 11994   | 1.75      | 7 | 56.05 | 1622    | 0.24      |
| 2 | 51.00 | 37098   | 5.41      | 5 | 54.05 | 2334    | 0.34      | 8 | 57.05 | 2558    | 0.37      |
| 3 | 52.05 | 11223   | 1.64      | 6 | 55.00 | 9356    | 1.37      | 9 | 58.05 | 571     | 0.08      |



**Cairo University  
Micro Analytical Center**

**DI Analysis  
Shimadzu Qp-2010 Plus**

Sample Information  
 Analyzed by : Dr. Mai Younis  
 Analyzed : 21/01/2007 02:16:59  
 Sample Name : 6B  
 Sample ID :  
 Customer Name : Dr. Eman Ashraf - Pharmacy - Zagazik  
 Data File : C:\GCMSolution\Data\Project1\6B.QGD  
 Org Data File : C:\GCMSolution\Data\Project1\6B.QGD  
 Method File : C:\GCMSolution\Data\Project1\High Temperature Op  
 Org Method File : C:\GCMSolution\Data\Project1\High Temperature Op  
 Report File :  
 Tuning File : C:\GCMSolution\System\Tune1\\_default.qgt  
 SEndIfSModified by : Dr. Mai Younis  
 Modified : 21/01/2007 02:25:13

Method  
 Analytical Line 1  
 IonSourceTemp : 250.00 °C  
 [MS Table]  
 --Group 1 - Event 1--  
 Start Time : 0.00min  
 End Time : 10.00min  
 ACQ Mode : Scan  
 Event Time : 0.50sec  
 Scan Speed : 1250  
 Start m/z : 50.00  
 End m/z : 600.00  
 Electron Voltage : 70 eV  
 Ionization Mode : EI

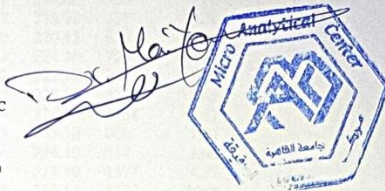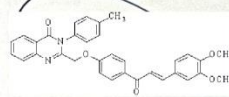

C:\GCMSolution\Data\Project1\6B.QGD

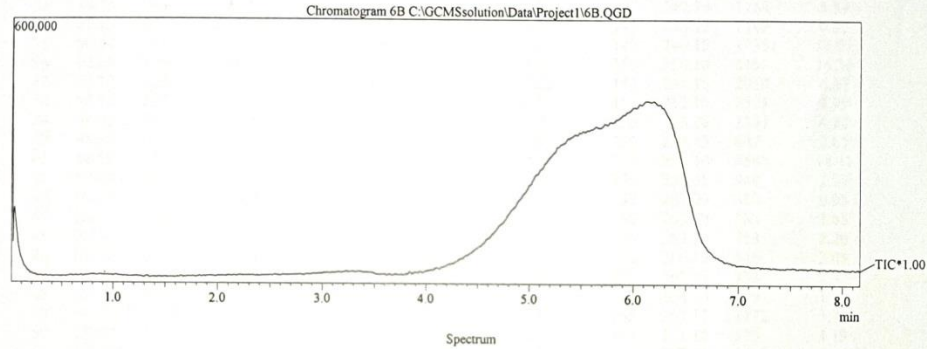

Line#:1 R.Time:5.8(Scan#:702)  
 MassPeaks:178  
 RawMode:Single 5.8(702) BasePeak:146(31542)  
 BG Mode:None Group 1 - Event 1

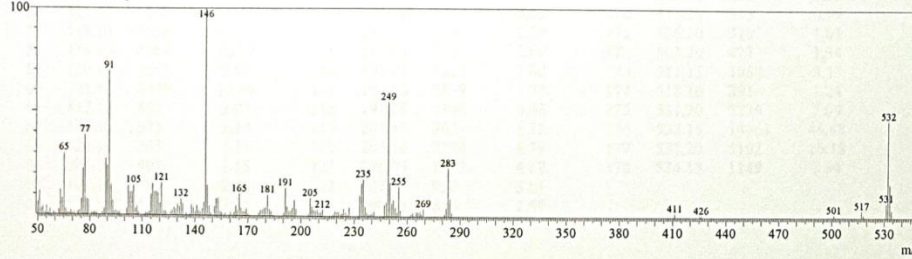

Mass Table  
 Line#:1 R.Time:5.8(Scan#:702)  
 MassPeaks:178  
 RawMode:Single 5.8(702) BasePeak:146(31542)  
 BG Mode:None Group 1 - Event 1

| # | m/z   | Abs. In | Rel. Int. | # | m/z   | Abs. In | Rel. Int. |
|---|-------|---------|-----------|---|-------|---------|-----------|
| 1 | 50.05 | 1996    | 6.33      | 4 | 53.00 | 1231    | 3.90      |
| 2 | 51.00 | 3610    | 11.45     | 5 | 54.10 | 394     | 1.25      |
| 3 | 52.00 | 996     | 3.16      | 6 | 55.05 | 1353    | 4.29      |
|   |       |         |           | 7 | 56.05 | 393     | 1.25      |
|   |       |         |           | 8 | 57.00 | 910     | 2.89      |
|   |       |         |           | 9 | 59.05 | 488     | 1.55      |

**(E)-2-((4-Cinnamoylphenoxy)methyl)-3-(4-methoxyphenyl)quinazolin-4(3H)-one (38).**

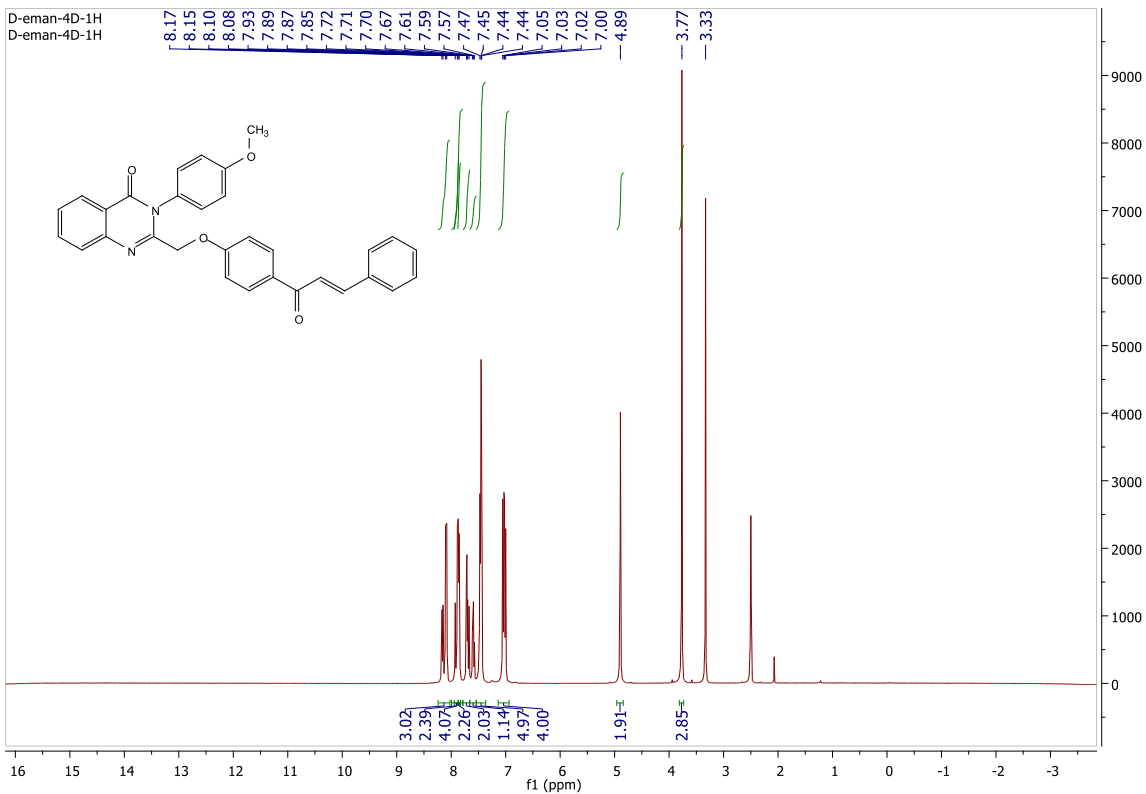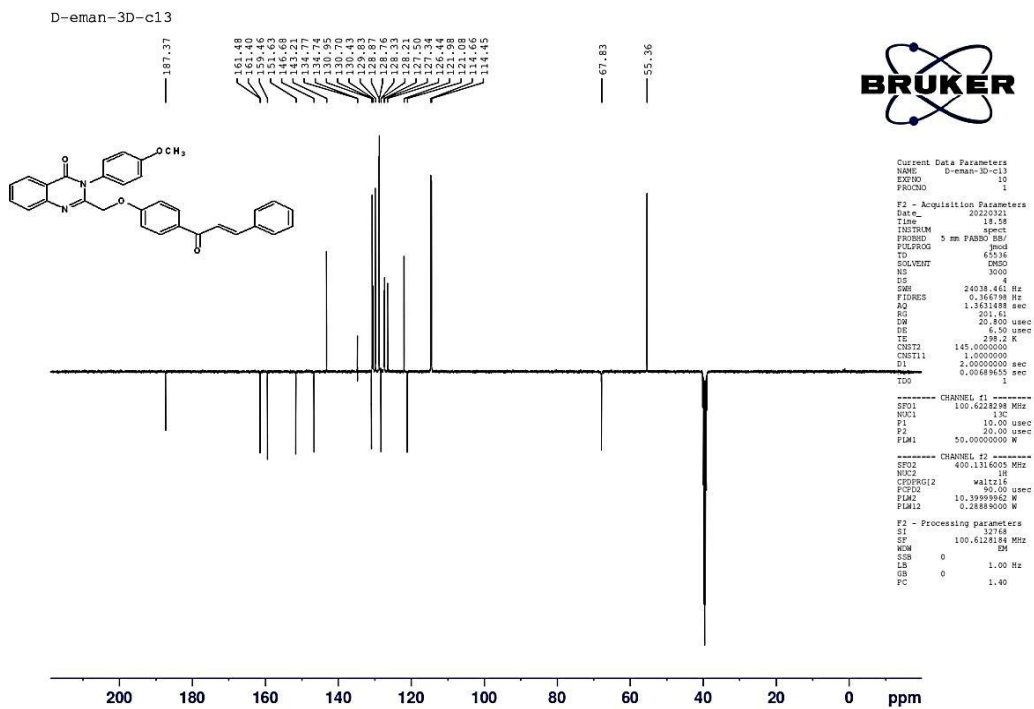

## Cairo University Micro Analytical Center

### DI Analysis Shimadzu Qp-2010 Plus

Sample Information  
 Analyzed by : Dr. Mai Younis  
 Analyzed : 21/01/2007 04:25:25  
 Sample Name : 3D  
 Sample ID :  
 Customer Name : Dr. Eman Ashraf - Pharmacy - Zagazik  
 Data File : C:\GCMSolution\Data\Project1\3D.QGD  
 Org. Data File : C:\GCMSolution\Data\Project1\3D.QGD  
 Method File : C:\GCMSolution\Data\Project1\High Temperature Op  
 Org. Method File : C:\GCMSolution\Data\Project1\High Temperature Op  
 Report File :  
 Tuning File : C:\GCMSolution\System\Tune1\\_default.qgt  
 \$EndIT\$Modified by : Dr. Mai Younis  
 Modified : 21/01/2007 04:29:07

Method  
 Analytical Line 1  
 IonSourceTemp : 250.00 °C  
 [MS Table]  
 -Group 1 - Event 1-  
 Start Time : 0.00min  
 End Time : 10.00min  
 ACQ Mode : Scan  
 Event Time : 0.50sec  
 Scan Speed : 1250  
 Start m/z : 50.00  
 End m/z : 600.00  
 Electron Voltage : 70 eV  
 Ionization Mode : EI

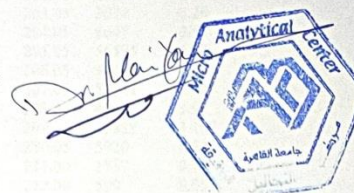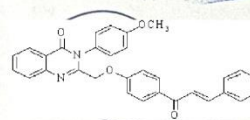

C:\GCMSolution\Data\Project1\3D.QGD

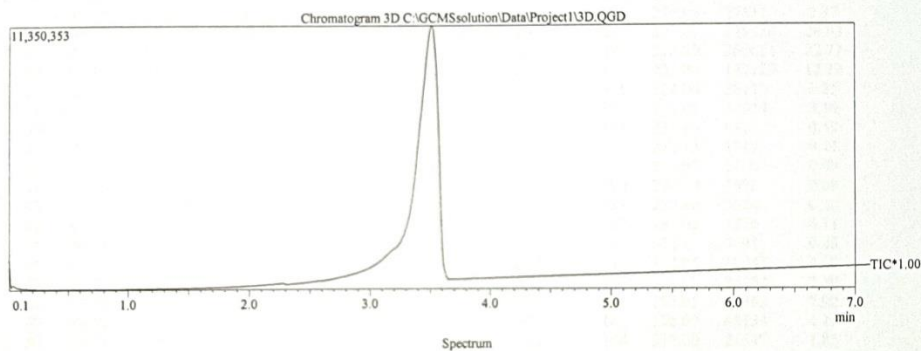

Line#:1 R.Time:3.5(Scan#:423)  
 MassPeaks:376  
 RawMode:Single 3.5(423) BasePeak:265(1171271)  
 BG Mode:None Group 1 - Event 1

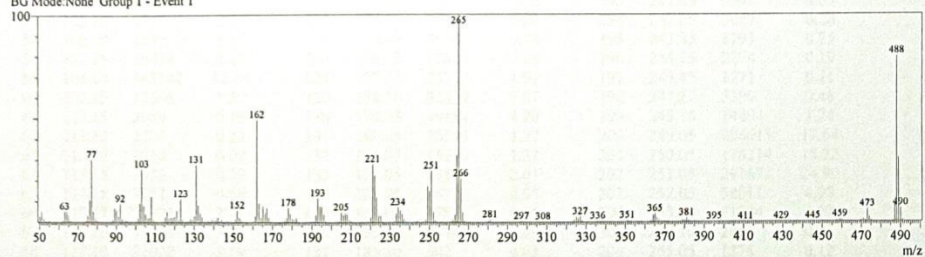

## Mass Table

Line#:1 R.Time:3.5(Scan#:423)

MassPeaks:376

RawMode:Single 3.5(423) BasePeak:265(1171271)

BG Mode:None Group 1 - Event 1

| # | m/z   | Abs. In | Rel. Int. | # | m/z   | Abs. In | Rel. Int. | # | m/z   | Abs. In | Rel. Int. |
|---|-------|---------|-----------|---|-------|---------|-----------|---|-------|---------|-----------|
| 1 | 50.05 | 32494   | 2.77      | 4 | 53.00 | 10962   | 0.94      | 7 | 56.00 | 1378    | 0.12      |
| 2 | 51.00 | 60498   | 5.17      | 5 | 54.05 | 2500    | 0.21      | 8 | 57.05 | 2777    | 0.24      |
| 3 | 52.05 | 17808   | 1.52      | 6 | 55.00 | 9049    | 0.77      | 9 | 58.05 | 666     | 0.06      |

**(E)-2-((4-(3-(4-Chlorophenyl)acryloyl)phenoxy)methyl)-3-(4-methoxyphenyl) quinazolin-4(3H)-one**  
**(39).**

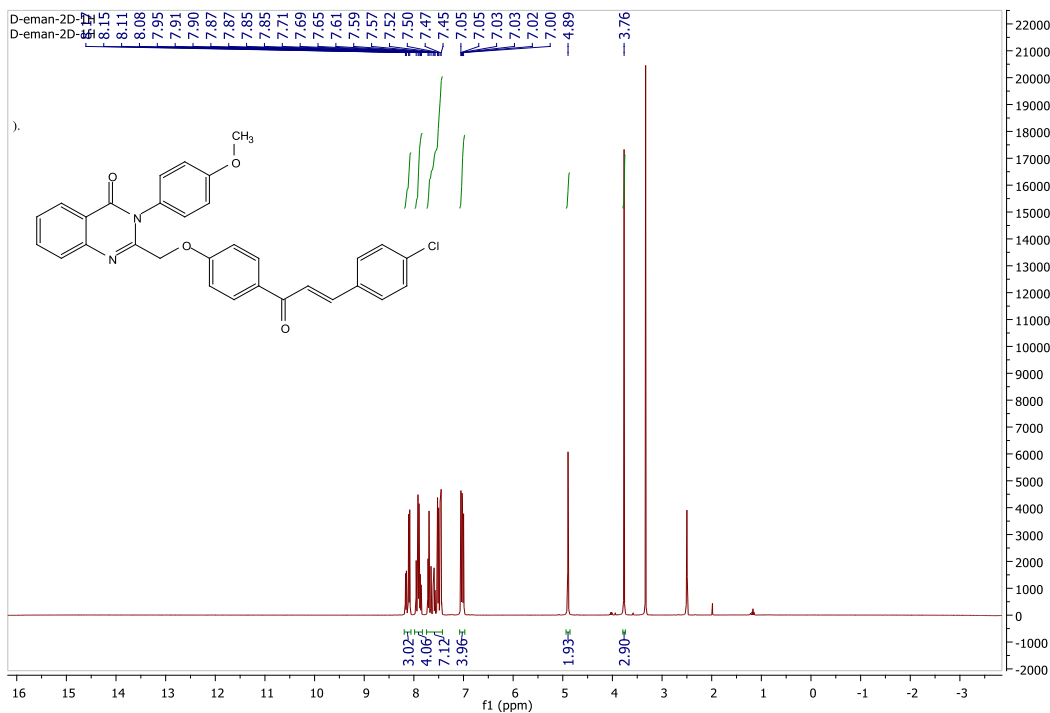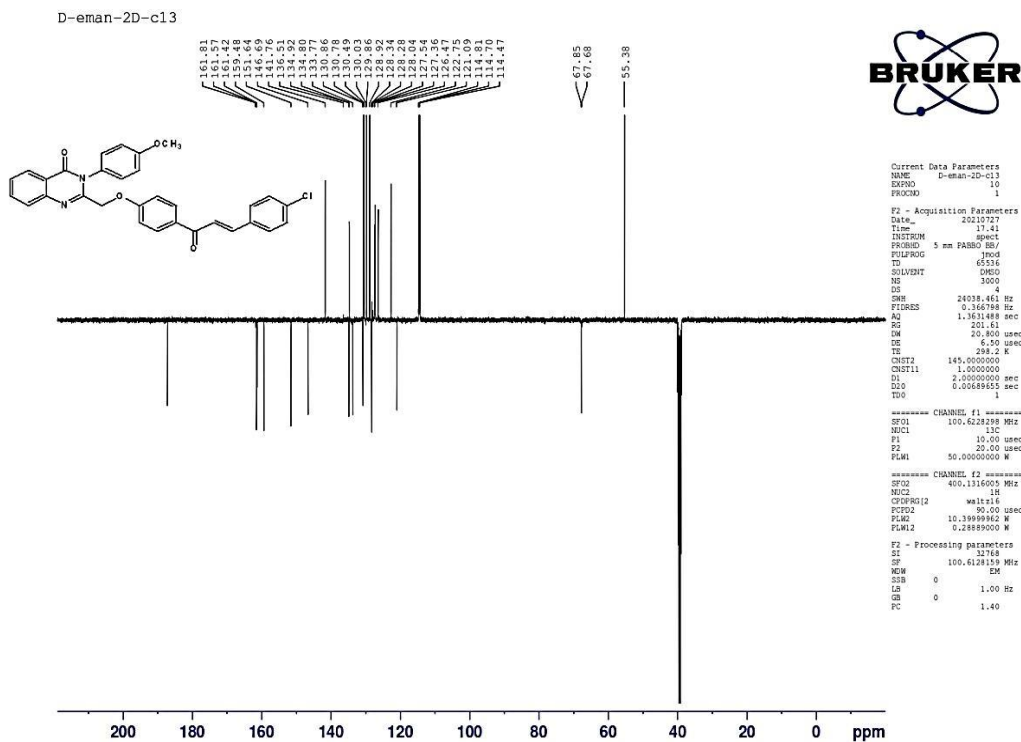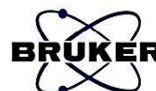

Current Data Parameters  
 NAME D-eman-2D-c13  
 EXPNO 10  
 PROCNO 1  
 F2 - Acquisition Parameters  
 Date\_ 20120727  
 Time 17.41  
 INSTRUM spect  
 PROBUS 5 mm PABBO BBV  
 PULPROG zgpg30  
 ID 65536  
 SOLVENT DMSO  
 NS 3000  
 DS 4  
 SWS 24038.461 Hz  
 FIDRES 0.366788 Hz  
 AQ 1.361888 sec  
 RG 201.61  
 RW 40.800 usec  
 DE 6.50 usec  
 TE 298.2 K  
 CNET2 145.000000  
 CNET11 1.000000  
 D1 2.0000000 sec  
 D1a 0.00689652 sec  
 D10 1  
 ===== CHANNEL f1 =====  
 SF01 100.628289 MHz  
 NUCL1 13C  
 P1 10.00 usec  
 P2 20.00 usec  
 PLM1 50.0000000 W  
 ===== CHANNEL f2 =====  
 SF02 400.136005 MHz  
 NUCL2 1H  
 CYPROG2 waltz16  
 FREQ2 90.00 usec  
 PLM2 10.39999862 W  
 PLM12 0.2389000 W  
 F1 - Processing parameters  
 SI 32768  
 SF 100.6128159 MHz  
 MW 2M  
 SSB 0  
 LB 1.00 Hz  
 GB 0  
 PC 1.40

**Cairo University  
Micro Analytical Center**

**DI Analysis  
Shimadzu Qp-2010 Plus**

Sample Information  
 Analyzed by : Dr. Mai Younis  
 Analyzed : 21/01/2007 04:19:18  
 Sample Name : 2D  
 Sample ID :  
 Customer Name : Dr. Eman Ashraf - Pharmacy - Zagazik  
 Data File : C:\GCMSolution\Data\Project1\2D.QGD  
 Org Data File : C:\GCMSolution\Data\Project1\2D.QGD  
 Method File : C:\GCMSolution\Data\Project1\High Temperature Op  
 Org Method File : C:\GCMSolution\Data\Project1\High Temperature Op  
 Report File :  
 Tuning File : C:\GCMSolution\System\Tune1\_default.qgt  
 \$End!\$ Modified by : Dr. Mai Younis  
 Modified : 21/01/2007 04:23:31

Method  
 Analytical Line 1  
 IonSourceTemp : 250.00 °C  
 [MS Table]  
 -Group 1 - Event 1-  
 Start Time : 0.00min  
 End Time : 10.00min  
 Scan :  
 ACQ Mode : Scan  
 Event Time : 0.50sec  
 Start m/z : 1250  
 End m/z : 600.00  
 Electron Voltage : 70 eV  
 Ionization Mode : EI

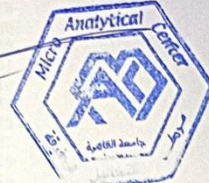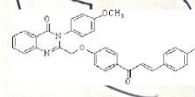

C:\GCMSolution\Data\Project1\2D.QGD

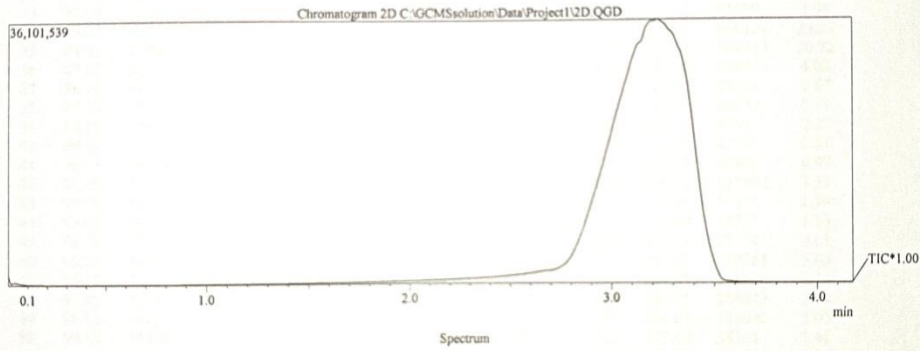

Line#: 1 R.Time: 3.2(Scan#: 379)  
 MassPeaks: 465  
 RawMode: Single 3.2(379) BasePeak: 265(4125578)  
 BG Mode: None Group 1 - Event 1

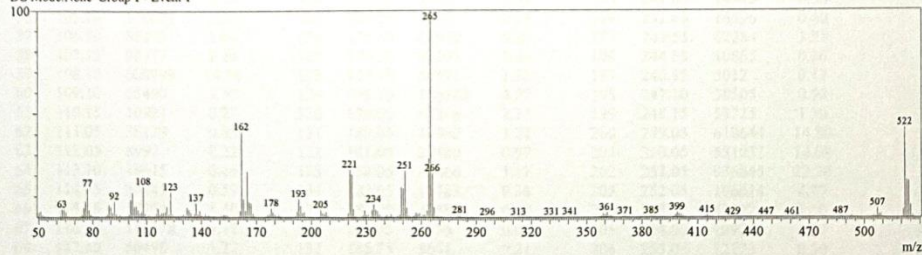

Mass Table  
 Line#: 1 R.Time: 3.2(Scan#: 379)  
 MassPeaks: 465  
 RawMode: Single 3.2(379) BasePeak: 265(4125578)  
 BG Mode: None Group 1 - Event 1

| # | m/z   | Abs. In | Rel. Int. | # | m/z   | Abs. In | Rel. Int. | # | m/z   | Abs. In | Rel. Int. |
|---|-------|---------|-----------|---|-------|---------|-----------|---|-------|---------|-----------|
| 1 | 50.05 | 90645   | 2.20      | 4 | 53.00 | 26644   | 0.65      | 7 | 56.05 | 4192    | 0.10      |
| 2 | 51.00 | 121642  | 2.95      | 5 | 54.05 | 6728    | 0.16      | 8 | 57.05 | 8185    | 0.20      |
| 3 | 52.05 | 40970   | 0.99      | 6 | 55.00 | 17474   | 0.42      | 9 | 58.05 | 1848    | 0.04      |

**(E)-3-(4-Methoxyphenyl)-2-((4-(3-(4-nitrophenyl)acryloyl)phenoxy)methyl)quinazolin-4(3H)-one (40).**

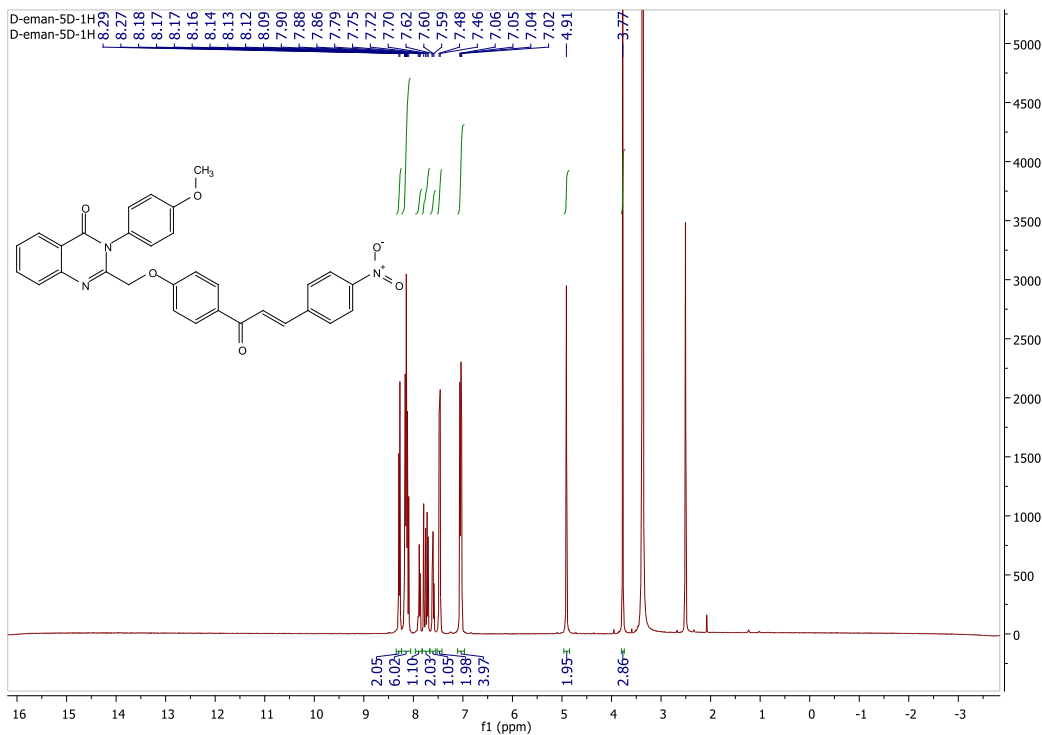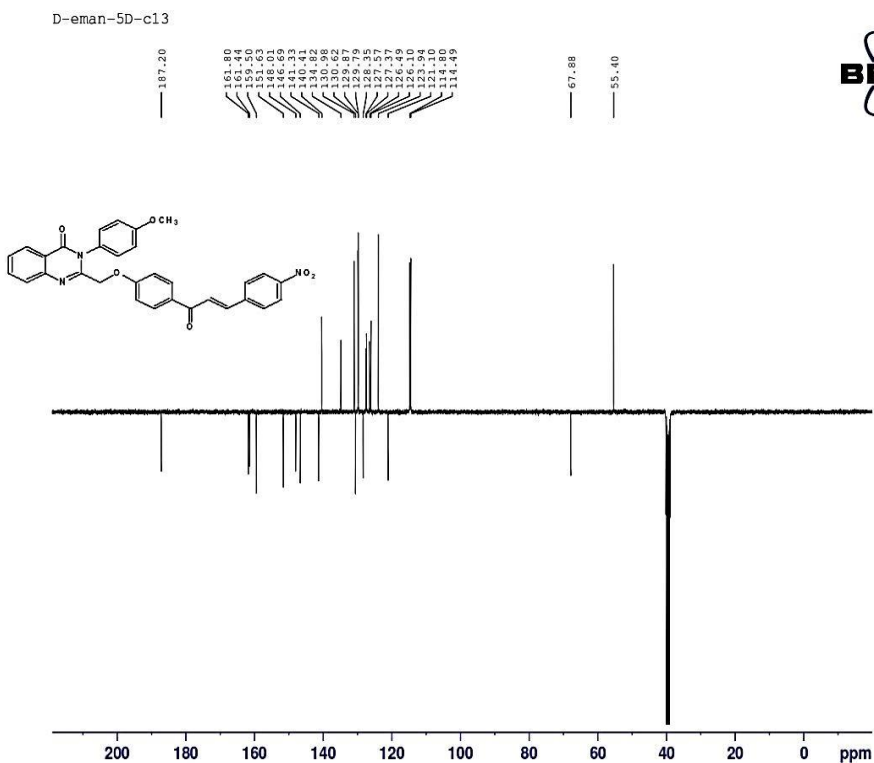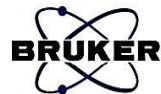

```

Current Data Parameters
NAME      D-eman-5D-c13
EXPNO    1
PROCNO   1

F2 - Acquisition Parameters
Date_    20210615
Time     8.16
INSTRUM  spect
PROBHD   5 mm PARBO BB/
PULPROG  zgpg30
TD        65536
SOLVENT  DMSO
NS        4000
DS        4
SWH       24038.461 Hz
FIDRES    0.364786 Hz
AQ        1.3631489 sec
RG         324.01
DW        20.800 usec
DE         6.50 usec
TE        298.1 K
CHST2    145.000000
CHST11   1.00000000
S1        2.00000000 sec
D20       0.00689455 sec
TD0       1

----- CHANNEL f1 -----
SFO1      100.622808 MHz
NUC1       13C
P1        10.00 usec
PL1       0.00 dB
PL12      50.00000000 W

----- CHANNEL f2 -----
SFO2      400.1314005 MHz
NUC2       1H
P2        10.00 usec
PL2       0.00 dB
PL12      10.38999562 W
PL122     0.28898600 W

F2 - Processing parameters
SI        32768
SF        100.6128143 MHz
WDW       EM
SSB       0
GB        0
PC        1.40
    
```



**Cairo University  
Micro Analytical Center**

**DI Analysis  
Shimadzu Qp-2010 Plus**

Sample Information  
 Analyzed by : Dr. Mai Younis  
 Analyzed : 21/01/2007 04:46:27  
 Sample Name : 5D  
 Sample ID :  
 Customer Name : Dr Eman Ashraf - Pharmacy - Zagazik  
 Data File : C:\GCMSsolution\Data\Project1\5D.QGD  
 Org Data File : C:\GCMSsolution\Data\Project1\5D.QGD  
 Method File : C:\GCMSsolution\Data\Project1\High Temperature Op  
 Org Method File : C:\GCMSsolution\Data\Project1\High Temperature Op  
 Report File :  
 Tuning File : C:\GCMSsolution\System\Tune1\\_default.qgt  
 \$EndIf\$Modified by : Dr. Mai Younis  
 Modified : 21/01/2007 04:51:47

Method

Analytical Line 1  
 IonSourceTemp :250.00 C  
 [MS Table]  
 -Group 1 - Event 1-  
 Start Time :0.00min  
 End Time :10.00min  
 ACQ Mode :Scan  
 Event Time :0.50sec  
 Scan Speed :1250  
 Start m/z :50.00  
 End m/z :600.00  
 Electron Voltage :70 eV  
 Ionization Mode :EI

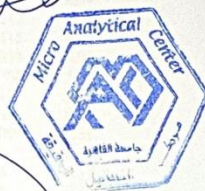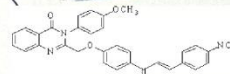

C:\GCMSsolution\Data\Project1\5D.QGD

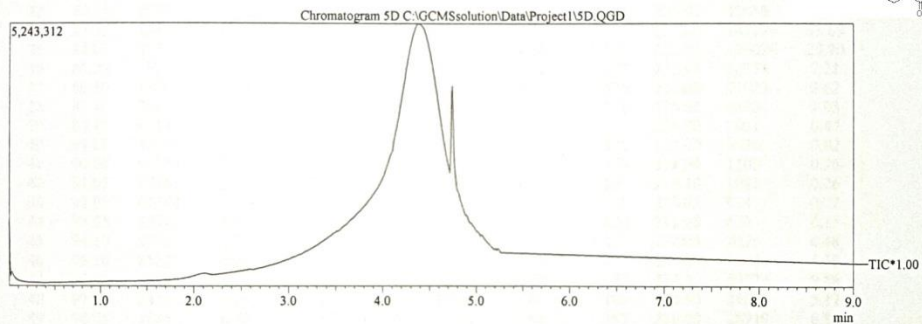

Spectrum

Line#:1 R.Time:4.4(Scan#:528)  
 MassPeaks:385  
 RawMode:Single 4.4(528) BasePeak:265(421468)  
 BG Mode:None Group 1 - Event 1

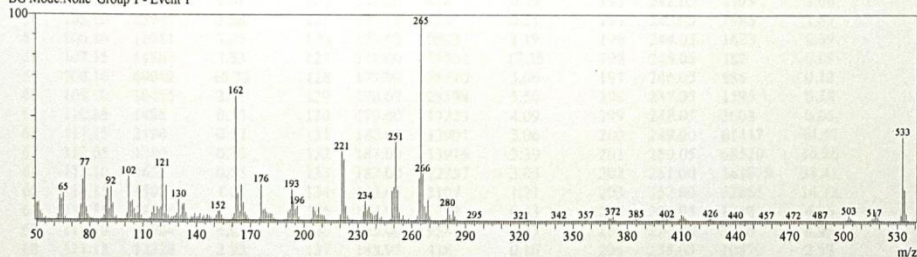

Mass Table

Line#:1 R.Time:4.4(Scan#:528)  
 MassPeaks:385  
 RawMode:Single 4.4(528) BasePeak:265(421468)  
 BG Mode:None Group 1 - Event 1

| # | m/z   | Abs. In | Rel. Int. | # | m/z   | Abs. In | Rel. Int. | # | m/z   | Abs. In | Rel. Int. |
|---|-------|---------|-----------|---|-------|---------|-----------|---|-------|---------|-----------|
| 1 | 50.00 | 35002   | 8.30      | 4 | 53.00 | 11956   | 2.84      | 7 | 56.05 | 1461    | 0.35      |
| 2 | 51.00 | 36487   | 8.66      | 5 | 54.05 | 2721    | 0.65      | 8 | 57.05 | 2465    | 0.58      |
| 3 | 52.00 | 17873   | 4.24      | 6 | 55.00 | 6169    | 1.46      | 9 | 58.05 | 717     | 0.17      |

**(E)-3-(4-Methoxyphenyl)-2-((4-(3-(p-tolyl)acryloyl)phenoxy)methyl)quinazo-*lin*-4(3H)-one (41).**

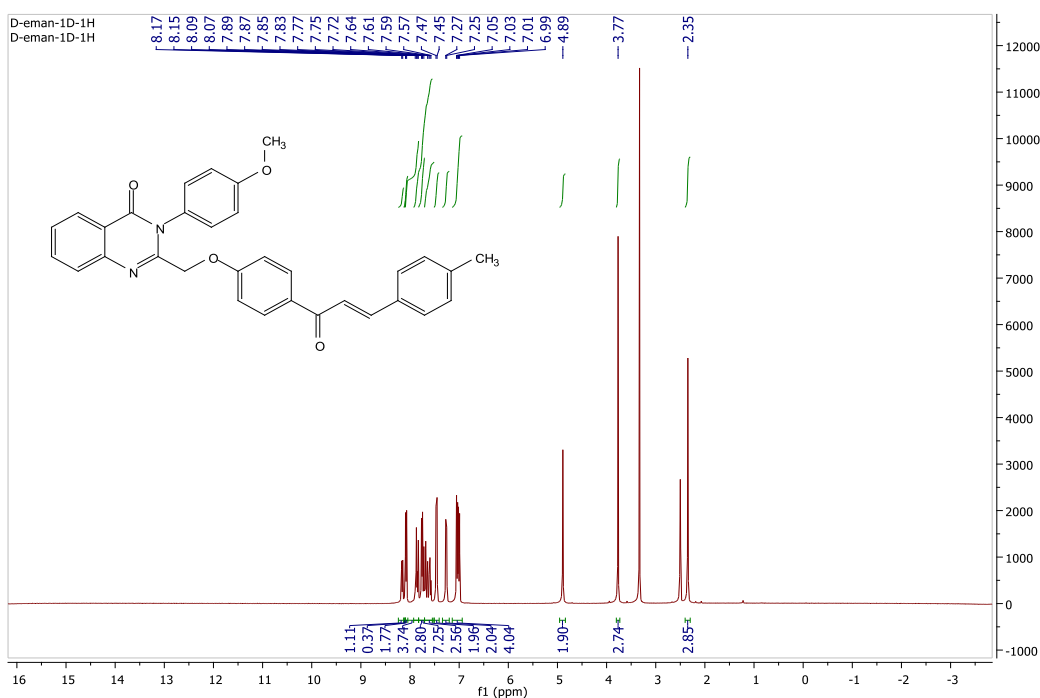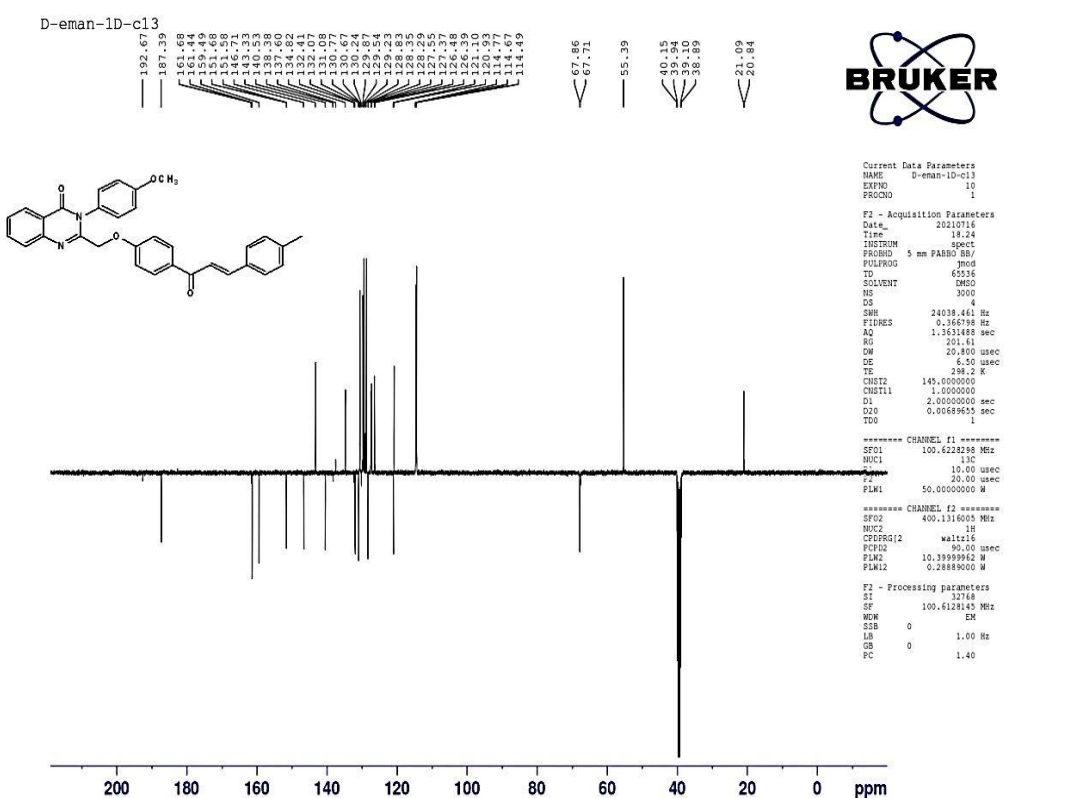

**Cairo University  
Micro Analytical Center**

**DI Analysis  
Shimadzu Qp-2010 Plus**

Sample Information  
 Analyzed by : Dr. Mai Younis  
 Analyzed : 21/01/2007 04:11:35  
 Sample Name : 1D  
 Sample ID :  
 Customer Name : Dr. Eman Ashraf - Pharmacy - Zagazik  
 Data File : C:\GCMSolution\Data\Project1\1D.QGD  
 Org Data File : C:\GCMSolution\Data\Project1\1D.QGD  
 Method File : C:\GCMSolution\Data\Project1\High Temperature Op  
 Org Method File : C:\GCMSolution\Data\Project1\High Temperature Op  
 Report File :  
 Tuning File : C:\GCMSolution\System1\Tune1\\_default.qgt  
 \$EndIS Modified by : Dr. Mai Younis  
 Modified : 21/01/2007 04:17:24

Method  
 Analytical Line 1  
 IonSourceTemp : 250.00 °C  
 [MS Table]  
 -Group 1 - Event 1-  
 Start Time : 0.00min  
 End Time : 10.00min  
 ACQ Mode : Scan  
 Event Time : 0.50sec  
 Scan Speed : 1250  
 Start m/z : 50.00  
 End m/z : 600.00  
 Electron Voltage : 70 eV  
 Ionization Mode : EI

*Dr. Mai Younis*



C:\GCMSolution\Data\Project1\1D.QGD

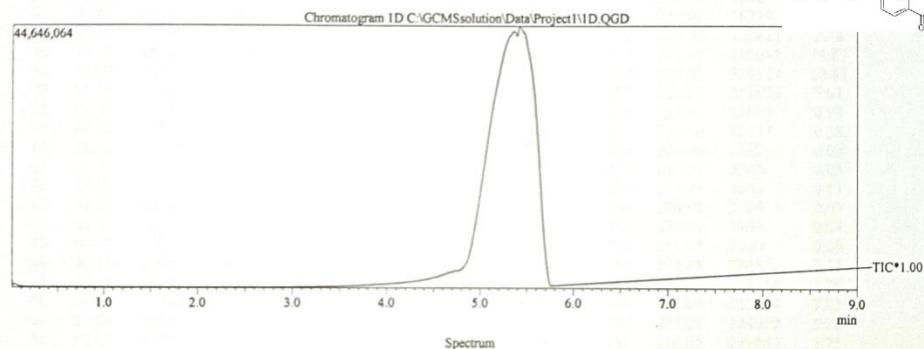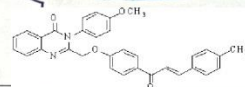

Line#:1 R.Time:5.3(Scan#:642)  
 MassPeaks:440  
 RawMode:Single 5.3(642) BasePeak:265(4449763)  
 BG Mode:None Group 1 - Event 1

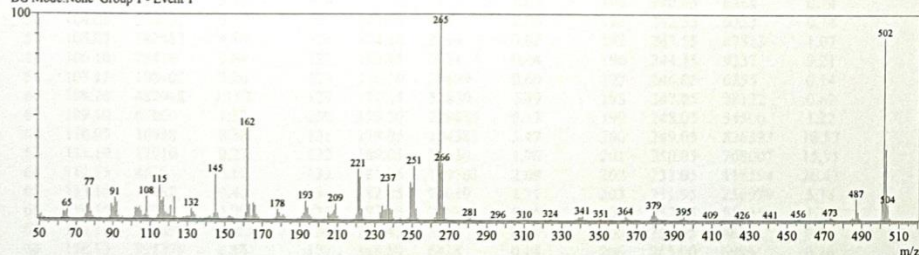

Mass Table  
 Line#:1 R.Time:5.3(Scan#:642)  
 MassPeaks:440  
 RawMode:Single 5.3(642) BasePeak:265(4449763)  
 BG Mode:None Group 1 - Event 1

| # | m/z   | Abs. In | Rel. Int. | # | m/z   | Abs. In | Rel. Int. | # | m/z   | Abs. In | Rel. Int. |
|---|-------|---------|-----------|---|-------|---------|-----------|---|-------|---------|-----------|
| 1 | 50.05 | 85382   | 1.92      | 4 | 53.00 | 38718   | 0.87      | 7 | 56.05 | 4797    | 0.11      |
| 2 | 51.00 | 120532  | 2.71      | 5 | 54.05 | 8066    | 0.18      | 8 | 57.05 | 8338    | 0.19      |
| 3 | 52.05 | 44163   | 0.99      | 6 | 55.00 | 26098   | 0.59      | 9 | 58.00 | 2492    | 0.06      |

**(E)-3-(4-Methoxyphenyl)-2-((4-(3-(4-methoxyphenyl)acryloyl)phenoxy)methyl)quinazolin-4(3H)-one (42).**

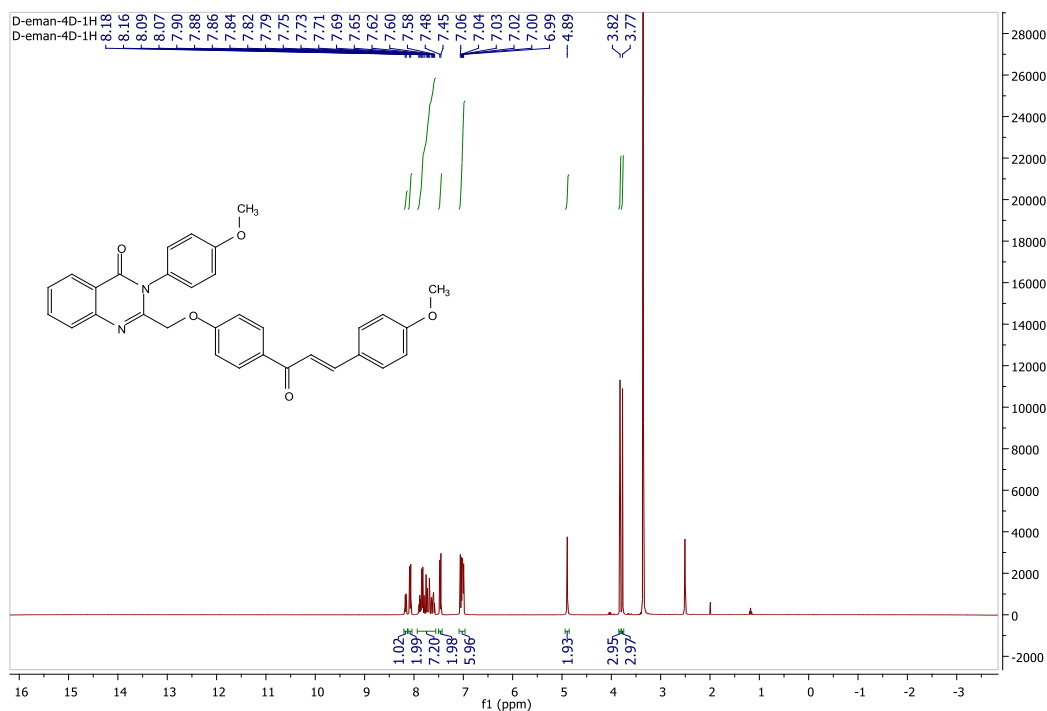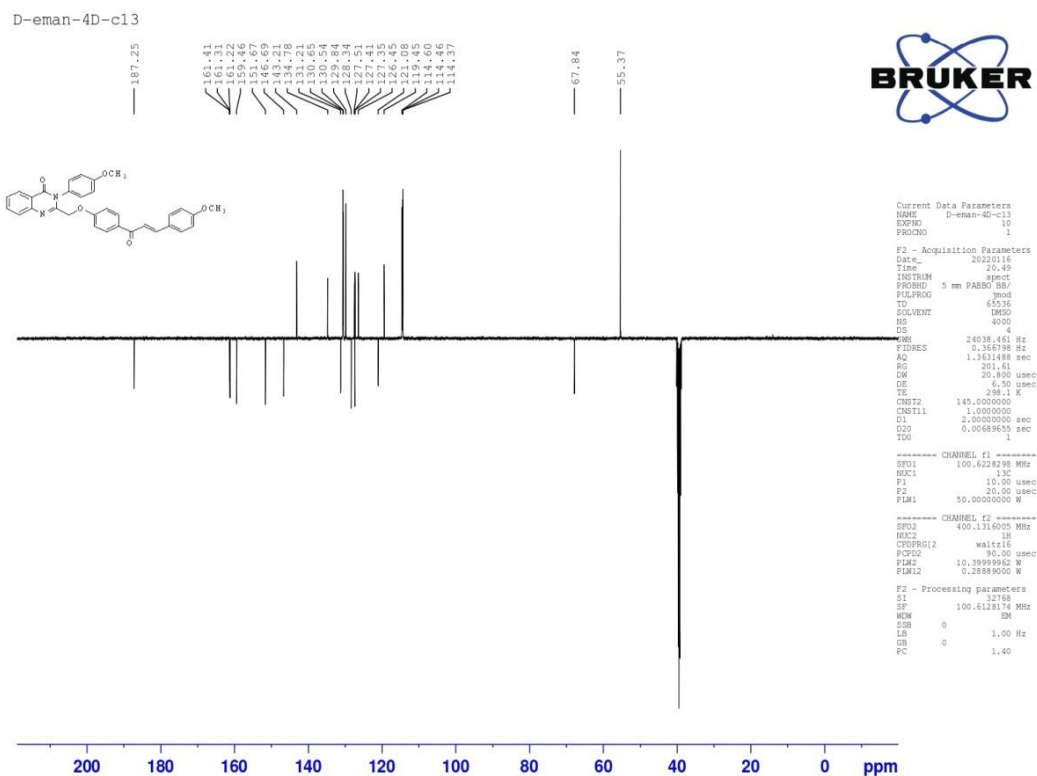

**Cairo University  
Micro Analytical Center**

**DI Analysis  
Shimadzu Qp-2010 Plus**

Sample Information  
 Analyzed by : Dr. Mai Younis  
 Analyzed : 21/01/2007 04:31:06  
 Sample Name : 4D  
 Sample ID :  
 Customer Name : Dr. Eman Ashraf - Pharmacy - Zagazik  
 Data File : C:\GCMSsolution\Data\Project1\4D.QGD  
 Org Data File : C:\GCMSsolution\Data\Project1\4D.QGD  
 Method File : C:\GCMSsolution\Data\Project1\High Temperature Op  
 Org Method File : C:\GCMSsolution\Data\Project1\High Temperature Op  
 Report File :  
 Tuning File : C:\GCMSsolution\System1\Tune1\\_default.qgt  
 \$End!\$Modified by : Dr. Mai Younis  
 Modified : 21/01/2007 04:39:02

Method  
 Analytical Line 1  
 IonSourceTemp : 250.00 °C  
 [MS Table]  
 --Group 1 - Event 1--  
 Start Time : 0.00min  
 End Time : 10.00min  
 ACQ Mode : Scan  
 Event Time : 0.50sec  
 Scan Speed : 1250  
 Start m/z : 50.00  
 End m/z : 600.00  
 Electron Voltage : 70 eV  
 Ionization Mode : EI

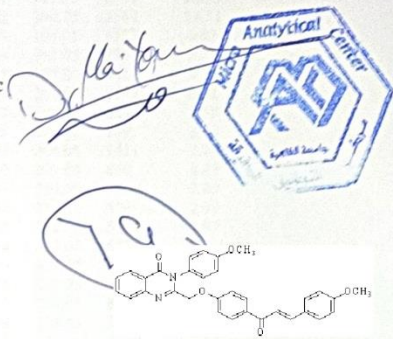

C:\GCMSsolution\Data\Project1\4D.QGD

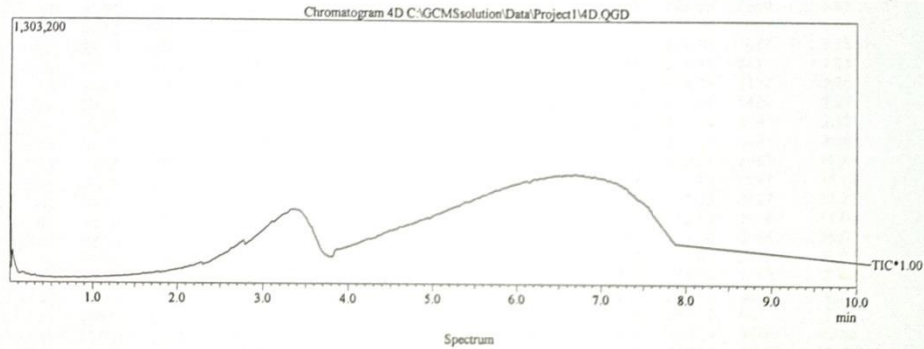

Line#:1 R.Time:3.3(Scan#:399)  
 MassPeaks:167  
 RawMode:Single 3.3(399) BasePeak:265(19428)  
 BG Mode:None Group 1 - Event 1

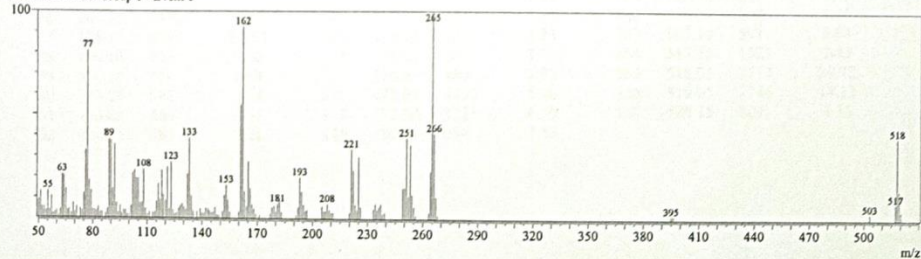

Mass Table  
 Line#:1 R.Time:3.3(Scan#:399)  
 MassPeaks:167  
 RawMode:Single 3.3(399) BasePeak:265(19428)  
 BG Mode:None Group 1 - Event 1

| # | m/z   | Abs. In | Rel. Int. | # | m/z   | Abs. In | Rel. Int. | # | m/z   | Abs. In | Rel. Int. |
|---|-------|---------|-----------|---|-------|---------|-----------|---|-------|---------|-----------|
| 1 | 50.00 | 1746    | 8.99      | 4 | 53.05 | 1063    | 5.47      | 7 | 56.10 | 777     | 4.00      |
| 2 | 51.00 | 2519    | 12.97     | 5 | 54.15 | 687     | 3.54      | 8 | 57.10 | 2070    | 10.65     |
| 3 | 52.00 | 1074    | 5.53      | 6 | 55.05 | 2536    | 13.05     | 9 | 58.05 | 437     | 2.25      |

**(E)-2-((4-(3-(3,4-Dimethoxyphenyl)acryloyl)phenoxy)methyl)-3-(4-methoxyphenyl) quinazolin-4(3H)-one (43).**

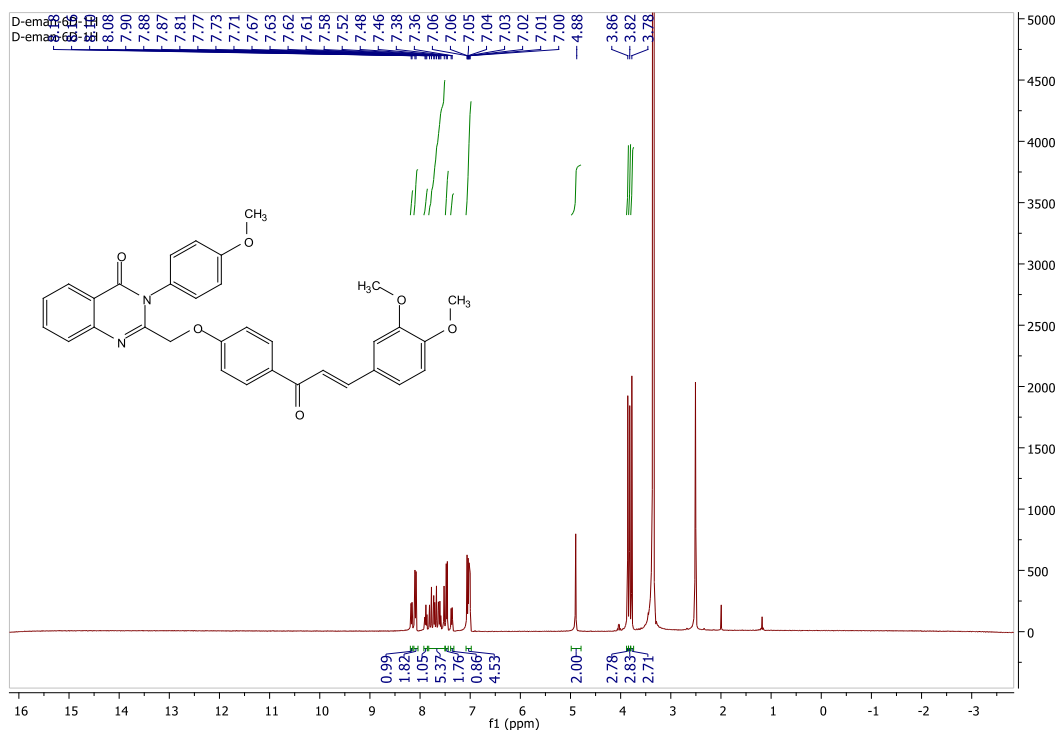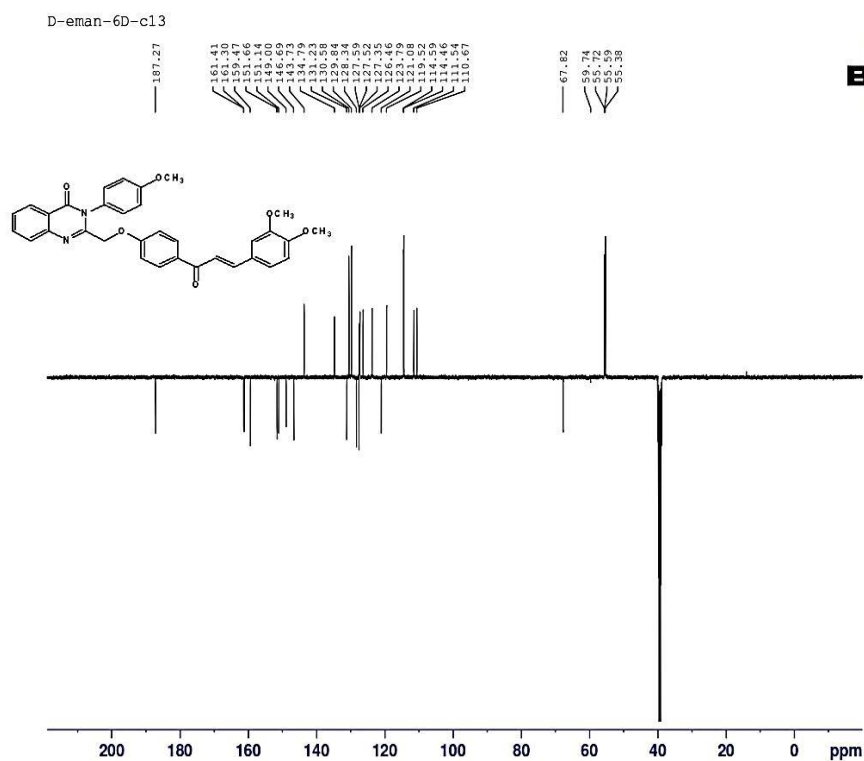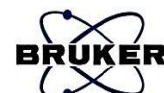

Current Data Parameters  
 NAME: D-eman-6D-c13  
 EXPNO: 20  
 PROCNO: 1

F2 - Acquisition Parameters  
 Date\_: 20220117  
 Time: 0.40  
 INSTRUM: spect  
 PROBHD: 5 mm PABBO 5B  
 PULPROG: jmod  
 ID: 6536  
 SOLVENT: DMSO  
 NS: 4000  
 DS: 4  
 SWH: 24038.461 Hz  
 FIDRES: 0.365798 Hz  
 AQ: 1.3531488 sec  
 RG: 201.04  
 DW: 20.800 usec  
 DE: 4.30 usec  
 TE: 298.1 K  
 CHST2: 145.000000  
 CHN11: 1.000000  
 D1: 2.00000000 sec  
 ED0: 0.0068885 sec  
 TDO: 1

==== CHANNEL f1 =====  
 SFO1: 100.628278 MHz  
 NUC1: 13C  
 P1: 18.00 usec  
 F2: 20.00 usec  
 PLW1: 50.0000000 W

==== CHANNEL f2 =====  
 SFO2: 400.1314509 MHz  
 NUC2: 1H  
 CTEPRG12: waltz16  
 PCPD2: 90.00 usec  
 PLW2: 10.1999962 W  
 PLW12: 0.28889000 W

F2 - Processing parameters  
 SI: 32768  
 SF: 100.6128170 MHz  
 MSH: EM  
 SSB: 0  
 LB: 1.00 Hz  
 GB: 0  
 PC: 1.40

## Cairo University Micro Analytical Center

**DI Analysis**  
**Shimadzu Qp-2010 Plus**

Sample Information  
 Analyzed by : Dr. Mai Younis  
 Analyzed : 21/01/2007 04:53:53  
 Sample Name : 6D  
 Sample ID :  
 Customer Name : Dr. Eman Ashraf - Pharmacy - Zagazik  
 Data File : C:\GCMSsolution\Data\Project1\6D.QGD  
 Org. Data File : C:\GCMSsolution\Data\Project1\6D.QGD  
 Method File : C:\GCMSsolution\Data\Project1\High Temperature Op  
 Org Method File : C:\GCMSsolution\Data\Project1\High Temperature Op  
 Report File :  
 Tuning File : C:\GCMSsolution\System\Tune1\\_default.qgt  
 \$EndI\$ Modified by : Dr. Mai Younis  
 Modified : 21/01/2007 04:59:15

Method  
 Analytical Line 1  
 IonSourceTemp : 250.00 C  
 [MS Table]  
 -Group 1 - Event 1-  
 Start Time : 0.00min  
 End Time : 10.00min  
 ACQ Mode : Scan  
 Event Time : 0.50sec  
 Scan Speed : 1250  
 Start m/z : 50.00  
 End m/z : 600.00

Electron Voltage : 70 eV  
 Ionization Mode : EI

C:\GCMSsolution\Data\Project1\6D.QGD

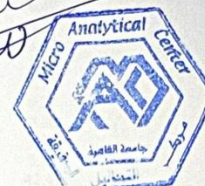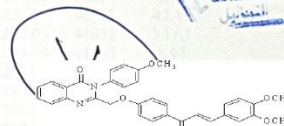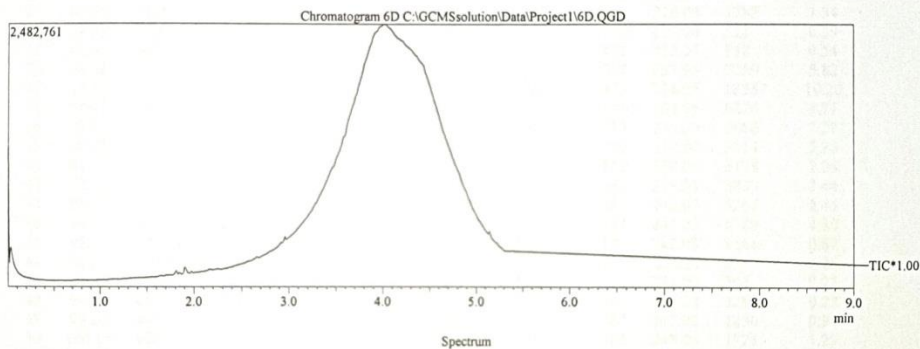

Line#:1 R.Time:4.0(Scan#:478)  
 MassPeaks:306  
 RawMode:Single 4.0(478) BasePeak:265(133235)  
 BG Mode:None Group 1 - Event 1

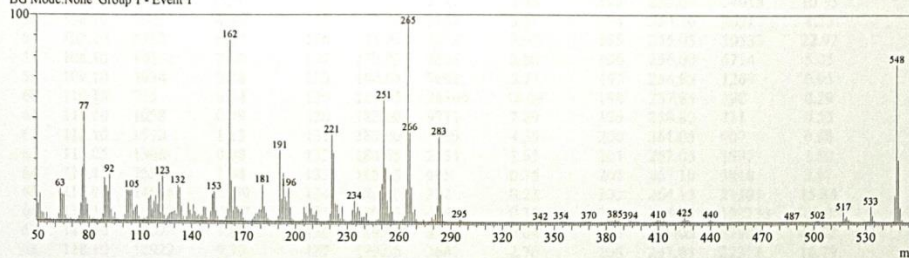

Mass Table

Line#:1 R.Time:4.0(Scan#:478)

MassPeaks:306

RawMode:Single 4.0(478) BasePeak:265(133235)

BG Mode:None Group 1 - Event 1

| # | m/z   | Abs. In | Rel. Int. | # | m/z   | Abs. In | Rel. Int. | # | m/z   | Abs. In | Rel. Int. |
|---|-------|---------|-----------|---|-------|---------|-----------|---|-------|---------|-----------|
| 1 | 50.00 | 11031   | 8.28      | 4 | 53.00 | 5394    | 4.05      | 7 | 56.00 | 959     | 0.72      |
| 2 | 51.00 | 17745   | 13.32     | 5 | 54.05 | 1417    | 1.06      | 8 | 57.05 | 1709    | 1.28      |
| 3 | 52.00 | 5809    | 4.36      | 6 | 55.00 | 5111    | 3.84      | 9 | 58.05 | 514     | 0.39      |
